# Supplementary material for: Comprehensive functional annotation of susceptibility SNPs prioritized 10 genes for schizophrenia
Source: PubMed Central journal article supplement (PMC6355777; doi:10.1038/s41398-019-0398-5), 2019-01-31
Supplement: 41398_2019_398_MOESM8_ESM.pdf [file 41398_2019_398_MOESM8_ESM.pdf]

Table S6. QTLs analyses results of functional SNPs.

1、The most significant meQTL analyses results.

| <b>Gene</b>          | <b>SNP</b> | <b>P_value</b> | <b>FDR</b> | <b>beta</b> |
|----------------------|------------|----------------|------------|-------------|
| <i>MAD1L1</i>        | rs6950330  | 8.69E-116      | 2.57E-111  | -0.10       |
| <i>HLA-C</i>         | rs9264586  | 8.65E-98       | 1.17E-93   | -0.22       |
| <i>LSM1</i>          | rs11783967 | 7.76E-95       | 8.96E-91   | -0.24       |
| <i>GABBR1</i>        | rs7757931  | 6.45E-94       | 7.03E-90   | -0.18       |
| <i>HLA-DQB1</i>      | rs9274657  | 4.25E-85       | 2.71E-81   | 0.20        |
| <i>SNX19</i>         | rs2276097  | 4.77E-83       | 2.71E-79   | -0.11       |
| <i>HAPLN4</i>        | rs735273   | 4.90E-78       | 2.06E-74   | 0.06        |
| <i>ZKSCAN8</i>       | rs9468298  | 5.47E-78       | 2.27E-74   | 0.06        |
| <i>BAG6</i>          | rs805302   | 4.67E-77       | 1.87E-73   | -0.08       |
| <i>HLA-G</i>         | rs1710     | 6.08E-75       | 2.16E-71   | 0.06        |
| <i>SRR</i>           | rs2224770  | 7.00E-63       | 1.33E-59   | 0.14        |
| <i>HLA-F</i>         | rs1633086  | 3.97E-58       | 5.87E-55   | -0.22       |
| <i>ZSCAN16-AS1</i>   | rs2275508  | 3.88E-57       | 5.38E-54   | 0.13        |
| <i>YJEFN3</i>        | rs1054930  | 3.96E-57       | 5.49E-54   | 0.11        |
| <i>FES</i>           | rs35346340 | 6.16E-56       | 7.97E-53   | 0.06        |
| <i>HLA-B</i>         | rs9266230  | 1.46E-55       | 1.85E-52   | -0.10       |
| <i>GPSM3</i>         | rs204994   | 1.87E-54       | 2.23E-51   | -0.04       |
| <i>MYO15A</i>        | rs2955365  | 2.15E-51       | 2.16E-48   | -0.05       |
| <i>OR2J2</i>         | rs3116856  | 1.63E-50       | 1.56E-47   | -0.05       |
| <i>ZSCAN12</i>       | rs7750526  | 1.03E-49       | 9.39E-47   | -0.14       |
| <i>ZFP57</i>         | rs416571   | 1.41E-49       | 1.28E-46   | 0.23        |
| <i>NT5C2</i>         | rs35525740 | 1.89E-49       | 1.71E-46   | -0.05       |
| <i>BRD2</i>          | rs176249   | 5.82E-49       | 5.11E-46   | 0.05        |
| <i>HLA-DQA1</i>      | rs707949   | 3.66E-48       | 3.06E-45   | -0.10       |
| <i>OGFOD2</i>        | rs4275659  | 4.56E-47       | 3.57E-44   | -0.03       |
| <i>IGSF9B</i>        | rs11223650 | 7.42E-47       | 5.74E-44   | -0.10       |
| <i>LOC554223</i>     | rs1610645  | 5.62E-45       | 3.87E-42   | 0.10        |
| <i>FAM109B</i>       | rs6002597  | 6.60E-44       | 4.23E-41   | 0.02        |
| <i>DRG2</i>          | rs11078410 | 3.94E-41       | 2.11E-38   | -0.03       |
| <i>C10orf32-ASMT</i> | rs12219246 | 2.43E-40       | 1.24E-37   | 0.06        |
| <i>TRMT61A</i>       | rs12880077 | 1.64E-38       | 7.47E-36   | -0.04       |
| <i>MICB</i>          | rs2596473  | 9.13E-38       | 3.97E-35   | 0.03        |
| <i>NAGA</i>          | rs4822088  | 1.15E-36       | 4.63E-34   | 0.03        |
| <i>TSNARE1</i>       | rs4976982  | 1.68E-35       | 6.25E-33   | 0.09        |
| <i>HLA-DRA</i>       | rs2395179  | 2.08E-35       | 7.72E-33   | -0.03       |
| <i>PLCH2</i>         | rs16824398 | 2.15E-35       | 7.97E-33   | 0.04        |
| <i>MUC22</i>         | rs9501045  | 2.50E-35       | 9.22E-33   | -0.08       |
| <i>NEK4</i>          | rs34017441 | 2.37E-33       | 7.60E-31   | 0.03        |
| <i>TRIM8</i>         | rs10786701 | 5.09E-32       | 1.48E-29   | -0.07       |
| <i>BAK1</i>          | rs511515   | 7.96E-31       | 2.12E-28   | -0.03       |

| <b>Gene</b>           | <b>SNP</b> | <b>P_value</b> | <b>FDR</b> | <b>beta</b> |
|-----------------------|------------|----------------|------------|-------------|
| <i>GLT8D1</i>         | rs11177    | 1.79E-29       | 4.32E-27   | -0.10       |
| <i>BCL11B</i>         | rs35604463 | 1.92E-27       | 3.99E-25   | 0.03        |
| <i>PRRC2A</i>         | rs3130621  | 7.82E-27       | 1.55E-24   | 0.03        |
| <i>BTN3A2</i>         | rs9379859  | 8.66E-27       | 1.71E-24   | 0.06        |
| <i>PPT2</i>           | rs3130281  | 2.54E-26       | 4.85E-24   | 0.03        |
| <i>ITIH4</i>          | rs13072536 | 3.97E-26       | 7.47E-24   | 0.06        |
| <i>TMEM110-MUSTN1</i> | rs6769789  | 8.40E-26       | 1.54E-23   | 0.03        |
| <i>CNNM2</i>          | rs10786736 | 2.64E-25       | 4.67E-23   | -0.05       |
| <i>HIST1H2BJ</i>      | rs9348746  | 3.73E-25       | 6.51E-23   | -0.02       |
| <i>WHSC1L1</i>        | rs2016875  | 2.58E-24       | 4.22E-22   | 0.04        |
| <i>GPANK1</i>         | rs3130618  | 7.71E-24       | 1.22E-21   | 0.05        |
| <i>C6orf10</i>        | rs1003878  | 1.77E-23       | 2.72E-21   | -0.21       |
| <i>FTCDNL1</i>        | rs796364   | 2.11E-23       | 3.21E-21   | -0.04       |
| <i>C6orf15</i>        | rs2523893  | 3.25E-23       | 4.87E-21   | -0.01       |
| <i>NT5DC2</i>         | rs1961958  | 3.05E-22       | 4.23E-20   | 0.03        |
| <i>ITIH1</i>          | rs678      | 3.49E-22       | 4.81E-20   | -0.05       |
| <i>HCFC1</i>          | rs2266886  | 4.96E-22       | 6.74E-20   | 0.02        |
| <i>LEMD2</i>          | rs2182658  | 6.90E-22       | 9.25E-20   | 0.02        |
| <i>C2orf82</i>        | rs2675956  | 9.93E-22       | 1.31E-19   | -0.03       |
| <i>HIST1H2BL</i>      | rs2747054  | 1.68E-21       | 2.18E-19   | 0.02        |
| <i>MPHOSPH9</i>       | rs1727334  | 7.50E-21       | 9.23E-19   | 0.06        |
| <i>PITPNM2</i>        | rs1727295  | 1.15E-20       | 1.39E-18   | -0.02       |
| <i>NFATC3</i>         | rs9922594  | 1.64E-20       | 1.96E-18   | 0.03        |
| <i>NMB</i>            | rs11630887 | 2.33E-20       | 2.75E-18   | -0.03       |
| <i>PEX10</i>          | rs10797426 | 2.39E-20       | 2.82E-18   | 0.03        |
| <i>LY6G5C</i>         | rs3130618  | 2.53E-20       | 2.97E-18   | 0.06        |
| <i>OR12D2</i>         | rs9257834  | 1.14E-19       | 1.27E-17   | -0.03       |
| <i>PPP1R13B</i>       | rs2223937  | 1.80E-19       | 1.96E-17   | 0.02        |
| <i>WBP2NL</i>         | rs5758527  | 1.81E-19       | 1.97E-17   | -0.01       |
| <i>SHISA8</i>         | rs9620001  | 2.45E-19       | 2.64E-17   | 0.05        |
| <i>TCF20</i>          | rs5758605  | 2.87E-18       | 2.80E-16   | -0.04       |
| <i>PSORS1C1</i>       | rs2233960  | 4.96E-18       | 4.74E-16   | -0.03       |
| <i>BAG5</i>           | rs28362583 | 6.06E-18       | 5.74E-16   | 0.03        |
| <i>TRIM26</i>         | rs885912   | 1.00E-17       | 9.29E-16   | -0.03       |
| <i>CACNA1C</i>        | rs1016388  | 1.19E-17       | 1.10E-15   | 0.02        |
| <i>CCHCR1</i>         | rs1265092  | 1.41E-17       | 1.30E-15   | -0.02       |
| <i>GRIN2A</i>         | rs9926303  | 1.89E-17       | 1.71E-15   | 0.02        |
| <i>NOTCH4</i>         | rs6457513  | 3.81E-16       | 3.04E-14   | -0.03       |
| <i>GATAD2A</i>        | rs2905435  | 4.51E-16       | 3.57E-14   | 0.02        |
| <i>SUGP1</i>          | rs2315022  | 2.07E-15       | 1.53E-13   | 0.01        |
| <i>TMTC1</i>          | rs302317   | 3.51E-15       | 2.53E-13   | -0.04       |
| <i>CENPM</i>          | rs5996096  | 5.40E-15       | 3.82E-13   | 0.01        |
| <i>DPCR1</i>          | rs3095153  | 5.51E-15       | 3.89E-13   | -0.03       |

| <b>Gene</b>       | <b>SNP</b>  | <b>P_value</b> | <b>FDR</b> | <b>beta</b> |
|-------------------|-------------|----------------|------------|-------------|
| <i>HIST1H2AJ</i>  | rs2747054   | 5.89E-15       | 4.15E-13   | 0.01        |
| <i>CSNK2B</i>     | rs805302    | 9.99E-15       | 6.87E-13   | -0.07       |
| <i>CHRNA2</i>     | rs2565065   | 1.36E-14       | 9.21E-13   | -0.04       |
| <i>NMUR2</i>      | rs112345465 | 1.91E-14       | 1.28E-12   | -0.04       |
| <i>TCF19</i>      | rs1265092   | 2.31E-14       | 1.53E-12   | 0.03        |
| <i>CACNB2</i>     | rs6482406   | 4.37E-14       | 2.81E-12   | 0.04        |
| <i>CDC25C</i>     | rs16373     | 6.37E-14       | 4.02E-12   | 0.03        |
| <i>POU5F1</i>     | rs887465    | 7.19E-14       | 4.51E-12   | -0.04       |
| <i>CLU</i>        | rs9331950   | 1.30E-13       | 7.91E-12   | 0.02        |
| <i>UBD</i>        | rs7757931   | 1.42E-13       | 8.61E-12   | -0.04       |
| <i>POM121L2</i>   | rs16897515  | 1.93E-13       | 1.15E-11   | 0.02        |
| <i>KLC1</i>       | rs59092643  | 2.13E-13       | 1.27E-11   | -0.02       |
| <i>INO80E</i>     | rs4788211   | 2.44E-13       | 1.44E-11   | 0.01        |
| <i>MLN</i>        | rs1318691   | 3.34E-13       | 1.95E-11   | 0.02        |
| <i>NGEF</i>       | rs2675956   | 4.46E-13       | 2.57E-11   | -0.02       |
| <i>RERE</i>       | rs301792    | 6.23E-13       | 3.53E-11   | -0.01       |
| <i>MGAT3</i>      | rs9306336   | 1.01E-12       | 5.61E-11   | -0.01       |
| <i>FLOT1</i>      | rs1059612   | 1.52E-12       | 8.25E-11   | -0.03       |
| <i>FURIN</i>      | rs4702      | 1.68E-12       | 9.05E-11   | -0.01       |
| <i>SPATS2L</i>    | rs3769446   | 2.10E-12       | 1.12E-10   | 0.09        |
| <i>HLA-DQA2</i>   | rs5021453   | 2.11E-12       | 1.13E-10   | -0.03       |
| <i>SFTA2</i>      | rs3131787   | 2.33E-12       | 1.23E-10   | -0.02       |
| <i>NAB2</i>       | rs324017    | 2.59E-12       | 1.37E-10   | 0.02        |
| <i>TNFRSF13C</i>  | rs9620001   | 4.27E-12       | 2.19E-10   | -0.02       |
| <i>PRRT1</i>      | rs3130281   | 4.34E-12       | 2.23E-10   | -0.02       |
| <i>CDK2AP1</i>    | rs4553407   | 5.71E-12       | 2.90E-10   | 0.03        |
| <i>C16orf92</i>   | rs4788211   | 7.63E-12       | 3.81E-10   | 0.01        |
| <i>HHAT</i>       | rs3765879   | 2.11E-11       | 9.97E-10   | -0.02       |
| <i>DGKZ</i>       | rs876701    | 2.32E-11       | 1.09E-09   | -0.01       |
| <i>GNL3</i>       | rs34017441  | 2.99E-11       | 1.39E-09   | 0.01        |
| <i>GTF2H4</i>     | rs3095153   | 3.61E-11       | 1.66E-09   | 0.04        |
| <i>IER3</i>       | rs3094125   | 5.58E-11       | 2.51E-09   | -0.13       |
| <i>CUL3</i>       | rs3768886   | 6.75E-11       | 3.00E-09   | 0.04        |
| <i>ZNF165</i>     | rs3734573   | 7.25E-11       | 3.21E-09   | 0.01        |
| <i>PPM1M</i>      | rs11717383  | 1.23E-10       | 5.29E-09   | 0.01        |
| <i>DOC2A</i>      | rs4788211   | 1.58E-10       | 6.70E-09   | -0.02       |
| <i>PPP1CC</i>     | rs12305489  | 1.70E-10       | 7.16E-09   | -0.02       |
| <i>PPT2-EGFL8</i> | rs3130281   | 1.89E-10       | 7.92E-09   | 0.01        |
| <i>TMEM243</i>    | rs73210240  | 2.20E-10       | 9.16E-09   | -0.04       |
| <i>ABCB9</i>      | rs883562    | 2.71E-10       | 1.11E-08   | 0.03        |
| <i>CYP2D7</i>     | rs5758605   | 3.71E-10       | 1.50E-08   | -0.02       |
| <i>SDCCAG8</i>    | rs1058305   | 3.73E-10       | 1.50E-08   | -0.01       |
| <i>DDR1</i>       | rs1049633   | 3.85E-10       | 1.55E-08   | 0.02        |

| <b>Gene</b>         | <b>SNP</b>  | <b>P_value</b> | <b>FDR</b> | <b>beta</b> |
|---------------------|-------------|----------------|------------|-------------|
| <i>SGK223</i>       | rs2948286   | 4.00E-10       | 1.60E-08   | -0.02       |
| <i>WDR73</i>        | rs11630887  | 7.70E-10       | 2.97E-08   | 0.02        |
| <i>MAN2A1</i>       | rs3819904   | 7.71E-10       | 2.98E-08   | 0.02        |
| <i>SEMA3B</i>       | rs6776145   | 9.09E-10       | 3.48E-08   | 0.02        |
| <i>SLCO4C1</i>      | rs3114661   | 9.18E-10       | 3.51E-08   | 0.02        |
| <i>LHFPL3</i>       | rs7807853   | 1.00E-09       | 3.81E-08   | 0.02        |
| <i>LST1</i>         | rs1800629   | 1.22E-09       | 4.57E-08   | -0.02       |
| <i>RENBP</i>        | rs2269373   | 1.46E-09       | 5.41E-08   | -0.01       |
| <i>ARL6IP4</i>      | rs4275659   | 1.46E-09       | 5.43E-08   | -0.01       |
| <i>ANKRD44</i>      | rs1429417   | 1.68E-09       | 6.17E-08   | 0.01        |
| <i>WBP1L</i>        | rs284858    | 2.45E-09       | 8.79E-08   | -0.01       |
| <i>GOLGA6L4</i>     | rs62029580  | 3.78E-09       | 1.32E-07   | 0.02        |
| <i>APOM</i>         | rs1046089   | 4.39E-09       | 1.52E-07   | 0.04        |
| <i>LOC100131289</i> | rs111770007 | 5.19E-09       | 1.78E-07   | 0.02        |
| <i>HLA-H</i>        | rs1736937   | 8.79E-09       | 2.91E-07   | 0.02        |
| <i>FAM53C</i>       | rs16373     | 1.32E-08       | 4.25E-07   | 0.02        |
| <i>PLEKHO1</i>      | rs72694953  | 1.81E-08       | 5.72E-07   | -0.04       |
| <i>KDM3B</i>        | rs16373     | 2.29E-08       | 7.11E-07   | 0.02        |
| <i>IMMP2L</i>       | rs37716     | 2.29E-08       | 7.12E-07   | -0.02       |
| <i>ETF1</i>         | rs55985421  | 3.57E-08       | 1.08E-06   | 0.01        |
| <i>DPYD</i>         | rs1801265   | 3.89E-08       | 1.17E-06   | -0.02       |
| <i>GIGYF2</i>       | rs6710294   | 6.33E-08       | 1.83E-06   | -0.01       |
| <i>C6orf48</i>      | rs3115674   | 1.45E-07       | 3.96E-06   | 0.02        |
| <i>PPP1R16B</i>     | rs6129108   | 1.48E-07       | 4.02E-06   | 0.01        |
| <i>CYP17A1</i>      | rs12219246  | 1.85E-07       | 4.98E-06   | 0.01        |
| <i>ZKSCAN3</i>      | rs7750526   | 2.33E-07       | 6.15E-06   | -0.01       |
| <i>HSPA1B</i>       | rs2075800   | 2.57E-07       | 6.74E-06   | -0.01       |
| <i>LINC00336</i>    | rs511515    | 3.98E-07       | 1.01E-05   | -0.02       |
| <i>PBX2</i>         | rs204993    | 4.66E-07       | 1.17E-05   | 0.02        |
| <i>LTA</i>          | rs1800629   | 6.55E-07       | 1.60E-05   | 0.02        |
| <i>ATXN7</i>        | rs7627690   | 7.81E-07       | 1.88E-05   | -0.01       |
| <i>GALNT10</i>      | rs11740474  | 8.01E-07       | 1.92E-05   | 0.01        |
| <i>SREBF2</i>       | rs9607850   | 8.56E-07       | 2.04E-05   | 0.01        |
| <i>CYP2D6</i>       | rs28579115  | 8.87E-07       | 2.11E-05   | 0.03        |
| <i>BAG4</i>         | rs16887244  | 9.70E-07       | 2.29E-05   | -0.01       |
| <i>ARHGAP1</i>      | rs61884292  | 9.76E-07       | 2.30E-05   | 0.01        |
| <i>RNF5</i>         | rs3134940   | 1.03E-06       | 2.42E-05   | -0.01       |
| <i>3-Sep</i>        | rs5758527   | 1.18E-06       | 2.75E-05   | -0.01       |
| <i>MAU2</i>         | rs2315022   | 1.30E-06       | 3.00E-05   | 0.01        |
| <i>TWF2</i>         | rs1060330   | 1.49E-06       | 3.39E-05   | -0.02       |
| <i>ATG13</i>        | rs6485685   | 1.57E-06       | 3.56E-05   | 0.01        |
| <i>HSPA1L</i>       | rs2075800   | 1.79E-06       | 4.02E-05   | 0.01        |
| <i>C2orf47</i>      | rs281771    | 1.82E-06       | 4.08E-05   | -0.01       |

| <b>Gene</b>      | <b>SNP</b> | <b>P_value</b> | <b>FDR</b> | <b>beta</b> |
|------------------|------------|----------------|------------|-------------|
| <i>DNAH1</i>     | rs7622851  | 2.20E-06       | 4.86E-05   | 0.01        |
| <i>DRD2</i>      | rs17602038 | 2.87E-06       | 6.20E-05   | 0.01        |
| <i>BTN2A2</i>    | rs9393716  | 4.31E-06       | 8.99E-05   | 0.06        |
| <i>BTNL2</i>     | rs2001097  | 4.59E-06       | 9.51E-05   | -0.02       |
| <i>PRRG2</i>     | rs57940349 | 5.56E-06       | 1.13E-04   | -0.02       |
| <i>ZFYVE21</i>   | rs11846838 | 7.11E-06       | 1.42E-04   | 0.02        |
| <i>PBRM1</i>     | rs111177   | 1.22E-05       | 2.32E-04   | 0.01        |
| <i>C6orf47</i>   | rs805302   | 1.36E-05       | 2.55E-04   | -0.01       |
| <i>TYW5</i>      | rs281771   | 1.84E-05       | 3.36E-04   | 0.01        |
| <i>SLC7A6</i>    | rs1971546  | 2.09E-05       | 3.76E-04   | -0.01       |
| <i>HIST1H3I</i>  | rs200949   | 2.40E-05       | 4.26E-04   | 0.01        |
| <i>CCDC134</i>   | rs9607850  | 2.54E-05       | 4.48E-04   | 0.00        |
| <i>BTN2A1</i>    | rs3757150  | 2.60E-05       | 4.57E-04   | -0.01       |
| <i>GPM6A</i>     | rs7673823  | 2.68E-05       | 4.70E-04   | 0.01        |
| <i>SATB2</i>     | rs6748419  | 2.72E-05       | 4.76E-04   | 0.01        |
| <i>CACNA2D2</i>  | rs2236950  | 3.16E-05       | 5.45E-04   | 0.01        |
| <i>HCG27</i>     | rs887465   | 3.19E-05       | 5.49E-04   | -0.01       |
| <i>FGFR1</i>     | rs17182225 | 3.88E-05       | 6.56E-04   | -0.01       |
| <i>SCGN</i>      | rs7771468  | 3.98E-05       | 6.71E-04   | -0.01       |
| <i>SCAND2P</i>   | rs11630887 | 5.62E-05       | 9.13E-04   | -0.02       |
| <i>SLC17A2</i>   | rs34525648 | 7.07E-05       | 1.12E-03   | 0.01        |
| <i>VAR2</i>      | rs3131787  | 9.41E-05       | 1.45E-03   | 0.01        |
| <i>EMX1</i>      | rs2077586  | 9.48E-05       | 1.45E-03   | 0.04        |
| <i>FXR1</i>      | rs1805589  | 1.07E-04       | 1.62E-03   | -0.02       |
| <i>SYNGAP1</i>   | rs9394145  | 1.08E-04       | 1.63E-03   | 0.01        |
| <i>AGPAT1</i>    | rs3130281  | 1.34E-04       | 1.97E-03   | 0.01        |
| <i>SMG6</i>      | rs2224770  | 1.35E-04       | 1.98E-03   | 0.00        |
| <i>HIST1H3C</i>  | rs28360595 | 1.82E-04       | 2.59E-03   | 0.03        |
| <i>ZSCAN31</i>   | rs9468350  | 1.86E-04       | 2.64E-03   | 0.01        |
| <i>CNTN4</i>     | rs9845120  | 2.07E-04       | 2.90E-03   | 0.01        |
| <i>HIST1H2AC</i> | rs198811   | 2.22E-04       | 3.09E-03   | -0.03       |
| <i>LRRC48</i>    | rs4584886  | 2.28E-04       | 3.16E-03   | 0.00        |
| <i>KCTD13</i>    | rs4424923  | 2.31E-04       | 3.20E-03   | 0.01        |
| <i>ALPK3</i>     | rs17601029 | 2.60E-04       | 3.54E-03   | -0.02       |
| <i>FOXP1</i>     | rs6803008  | 2.62E-04       | 3.57E-03   | 0.01        |
| <i>MOG</i>       | rs416571   | 2.87E-04       | 3.86E-03   | -0.01       |
| <i>PLA2G15</i>   | rs1971546  | 3.45E-04       | 4.53E-03   | -0.01       |
| <i>HIST1H1B</i>  | rs200949   | 3.46E-04       | 4.55E-03   | 0.00        |
| <i>AGER</i>      | rs204993   | 3.80E-04       | 4.93E-03   | 0.01        |
| <i>PRR12</i>     | rs57940349 | 3.91E-04       | 5.05E-03   | 0.02        |
| <i>HIST1H4K</i>  | rs2747054  | 4.06E-04       | 5.22E-03   | 0.01        |
| <i>HSPA1A</i>    | rs2075800  | 4.25E-04       | 5.43E-03   | -0.02       |
| <i>HIST1H1A</i>  | rs28360595 | 4.57E-04       | 5.79E-03   | -0.02       |

| <b>Gene</b>    | <b>SNP</b> | <b>P_value</b> | <b>FDR</b> | <b>beta</b> |
|----------------|------------|----------------|------------|-------------|
| <i>MIR29C</i>  | rs7537216  | 5.16E-04       | 6.44E-03   | -0.01       |
| <i>ZNF592</i>  | rs17600551 | 5.28E-04       | 6.56E-03   | -0.01       |
| <i>ZSCAN23</i> | rs16894108 | 5.42E-04       | 6.71E-03   | -0.01       |
| <i>SRPK2</i>   | rs3801281  | 6.10E-04       | 7.43E-03   | -0.01       |
| <i>PPP1R18</i> | rs9262142  | 6.14E-04       | 7.48E-03   | -0.01       |
| <i>CILP2</i>   | rs1054930  | 6.29E-04       | 7.64E-03   | 0.01        |
| <i>HSPA9</i>   | rs256013   | 6.48E-04       | 7.83E-03   | 0.00        |
| <i>BTN3A1</i>  | rs34273322 | 6.51E-04       | 7.86E-03   | -0.01       |
| <i>BNIP3L</i>  | rs3808581  | 6.53E-04       | 7.88E-03   | 0.01        |
| <i>NAA10</i>   | rs4898465  | 7.15E-04       | 8.53E-03   | -0.01       |
| <i>PPP4C</i>   | rs34855001 | 7.62E-04       | 9.00E-03   | 0.01        |
| <i>PLCL1</i>   | rs1464211  | 8.37E-04       | 9.76E-03   | -0.01       |

## 2、The most significant eQTL analyses results.

### (1) The most significant SMR analyses results in whole blood from GTEx.

| <b>Gene</b>          | <b>topSNP</b> | <b>p_eQTL</b> | <b>p_SMR</b> | <b>p_HEIDI</b> | <b>adjp_SMR</b> |
|----------------------|---------------|---------------|--------------|----------------|-----------------|
| <i>C4B</i>           | rs3135394     | 5.27E-19      | 3.69E-12     | 0.08           | 2.47E-09        |
| <i>TRIM27</i>        | rs3131067     | 9.47E-25      | 4.17E-11     | 0.06           | 1.40E-08        |
| <i>ZFP57</i>         | rs885945      | 9.09E-46      | 1.88E-10     | NA             | 1.21E-07        |
| <i>LINC00243</i>     | rs1049633     | 2.33E-12      | 2.92E-09     | 0.08           | 6.53E-07        |
| <i>CYP21A1P</i>      | rs1265947     | 1.11E-11      | 4.48E-09     | 0.07           | 6.96E-07        |
| <i>GPN3</i>          | rs11065647    | 2.79E-43      | 5.19E-09     | 0.61           | 6.96E-07        |
| <i>GATAD2A</i>       | rs4808203     | 1.40E-20      | 3.44E-08     | 0.21           | 3.84E-06        |
| <i>C4A</i>           | rs2854277     | 3.45E-14      | 4.40E-08     | 0.24           | 9.47E-06        |
| <i>RP11-73M18.8</i>  | rs11846404    | 3.87E-15      | 1.09E-07     | 0.10           | 1.04E-05        |
| <i>CYP21A2</i>       | rs2854277     | 3.73E-10      | 1.50E-07     | 0.63           | 1.26E-05        |
| <i>MAPK3</i>         | rs4424923     | 2.15E-20      | 2.44E-07     | NA             | 1.82E-05        |
| <i>SNX19</i>         | rs62621284    | 4.59E-89      | 1.18E-07     | NA             | 1.90E-05        |
| <i>KLC1</i>          | rs11846404    | 7.58E-13      | 3.73E-07     | 0.25           | 2.50E-05        |
| <i>TRIM38</i>        | rs34525648    | 8.91E-09      | 8.07E-07     | 0.10           | 4.92E-05        |
| <i>PRRC2A</i>        | rs2857694     | 4.83E-11      | 9.47E-07     | 0.51           | 5.29E-05        |
| <i>CCHCR1</i>        | rs2853999     | 2.19E-09      | 7.11E-07     | 0.71           | 5.39E-05        |
| <i>RPL23AP1</i>      | rs885945      | 6.30E-12      | 7.50E-07     | NA             | 5.39E-05        |
| <i>RP11-890B15.3</i> | rs62621284    | 7.13E-23      | 1.61E-06     | NA             | 8.01E-05        |
| <i>HLA-S</i>         | rs1131165     | 5.27E-15      | 2.27E-06     | 0.12           | 1.05E-04        |
| <i>PSMA4</i>         | rs905739      | 2.33E-10      | 4.28E-06     | NA             | 1.61E-04        |
| <i>TMTC1</i>         | rs302317      | 2.92E-18      | 4.73E-06     | NA             | 1.61E-04        |
| <i>AC013264.2</i>    | rs10931779    | 9.61E-11      | 4.31E-06     | 0.11           | 1.92E-04        |
| <i>C2orf47</i>       | rs1658810     | 2.46E-08      | 4.10E-06     | NA             | 1.92E-04        |
| <i>C2</i>            | rs9269102     | 3.32E-07      | 5.43E-06     | 0.69           | 2.18E-04        |
| <i>FAM216A</i>       | rs11065647    | 1.52E-10      | 5.53E-06     | 0.87           | 2.18E-04        |
| <i>PLCL1</i>         | rs3731570     | 2.60E-14      | 7.26E-06     | 0.07           | 2.34E-04        |
| <i>FLOT1</i>         | rs2394978     | 7.89E-07      | 6.52E-06     | 0.37           | 2.36E-04        |
| <i>FTCDNL1</i>       | rs281771      | 6.58E-08      | 7.35E-06     | NA             | 2.36E-04        |
| <i>LY6G5B</i>        | rs805303      | 4.96E-08      | 6.75E-06     | NA             | 2.36E-04        |
| <i>PBX2</i>          | rs204990      | 5.83E-07      | 7.40E-06     | 0.34           | 2.36E-04        |
| <i>HLA-G</i>         | rs3129984     | 1.38E-06      | 9.70E-06     | 0.42           | 2.83E-04        |
| <i>FAM109B</i>       | rs1807494     | 1.01E-10      | 1.07E-05     | NA             | 2.86E-04        |
| <i>MICB</i>          | rs9266209     | 4.47E-08      | 1.07E-05     | 0.31           | 2.86E-04        |
| <i>CYP2D8P1</i>      | rs134889      | 2.73E-09      | 1.20E-05     | 0.24           | 3.09E-04        |
| <i>NT5C2</i>         | rs77420391    | 3.45E-07      | 1.30E-05     | 0.69           | 3.22E-04        |
| <i>HCG4P3</i>        | rs885945      | 2.74E-08      | 1.17E-05     | NA             | 3.44E-04        |
| <i>TBX6</i>          | rs4424923     | 1.88E-09      | 1.55E-05     | NA             | 3.59E-04        |
| <i>POU5F1</i>        | rs6457375     | 5.85E-08      | 1.64E-05     | 0.12           | 3.66E-04        |
| <i>SETD8</i>         | rs10772999    | 2.24E-07      | 1.78E-05     | 0.46           | 3.86E-04        |

| <b>Gene</b>          | <b>topSNP</b> | <b>p_eQTL</b> | <b>p_SMR</b> | <b>p_HEIDI</b> | <b>adjp_SMR</b> |
|----------------------|---------------|---------------|--------------|----------------|-----------------|
| <i>AKAP10</i>        | rs72843506    | 1.07E-18      | 1.66E-05     | NA             | 4.30E-04        |
| <i>DUS2</i>          | rs56303487    | 1.18E-20      | 2.11E-05     | NA             | 4.42E-04        |
| <i>ALMS1</i>         | rs11903916    | 7.73E-11      | 2.20E-05     | NA             | 4.46E-04        |
| <i>YPEL3</i>         | rs4788198     | 4.64E-08      | 2.30E-05     | NA             | 4.53E-04        |
| <i>SREBF1</i>        | rs9895335     | 2.06E-14      | 2.41E-05     | 0.13           | 4.61E-04        |
| <i>FES</i>           | rs35346340    | 2.54E-09      | 2.61E-05     | NA             | 4.87E-04        |
| <i>DDX39B</i>        | rs113239947   | 4.06E-09      | 2.87E-05     | 0.27           | 5.19E-04        |
| <i>RP11-325F22.2</i> | rs7807853     | 3.19E-09      | 2.94E-05     | 0.70           | 5.19E-04        |
| <i>CDK2AP1</i>       | rs10846491    | 5.09E-09      | 3.04E-05     | 0.08           | 5.22E-04        |
| <i>HLA-F-AS1</i>     | rs1611296     | 3.08E-07      | 3.29E-05     | 0.23           | 5.38E-04        |
| <i>TMEM110</i>       | rs13072536    | 2.50E-10      | 3.27E-05     | 0.11           | 5.38E-04        |
| <i>MUSTN1</i>        | rs7638524     | 1.69E-12      | 2.40E-05     | 0.06           | 5.53E-04        |
| <i>MAP3K11</i>       | rs1193851     | 3.35E-10      | 3.76E-05     | NA             | 5.98E-04        |
| <i>TSSK6</i>         | rs62135552    | 2.13E-08      | 3.84E-05     | 0.09           | 5.98E-04        |
| <i>GABBR1</i>        | rs3129055     | 3.32E-07      | 4.11E-05     | 0.11           | 6.19E-04        |
| <i>PRMT7</i>         | rs1971546     | 4.59E-10      | 4.25E-05     | NA             | 6.20E-04        |
| <i>CCDC134</i>       | rs9607850     | 6.02E-09      | 5.36E-05     | NA             | 7.65E-04        |
| <i>PRSS16</i>        | rs3757150     | 1.09E-05      | 5.60E-05     | 0.40           | 7.82E-04        |
| <i>HLA-H</i>         | rs885945      | 2.77E-06      | 6.56E-05     | 0.23           | 8.32E-04        |
| <i>IER3</i>          | rs1639108     | 1.78E-05      | 6.10E-05     | 0.43           | 8.32E-04        |
| <i>MEI1</i>          | rs1047997     | 4.46E-07      | 6.70E-05     | NA             | 8.32E-04        |
| <i>RP1-265C24.5</i>  | rs9295759     | 2.35E-06      | 6.54E-05     | 0.07           | 8.32E-04        |
| <i>TEF</i>           | rs9611488     | 7.99E-08      | 6.38E-05     | NA             | 8.32E-04        |
| <i>ZBTB12</i>        | rs1131165     | 1.46E-06      | 6.65E-05     | 0.68           | 8.32E-04        |
| <i>INO80E</i>        | rs4788198     | 1.00E-06      | 7.82E-05     | NA             | 9.52E-04        |
| <i>FTSJ2</i>         | rs1476887     | 4.73E-06      | 8.64E-05     | 0.24           | 1.03E-03        |
| <i>RP11-499P20.2</i> | rs6482406     | 3.94E-07      | 1.01E-04     | NA             | 1.19E-03        |
| <i>ARL6IP4</i>       | rs941306      | 5.32E-07      | 1.11E-04     | 0.19           | 1.26E-03        |
| <i>SFMBT1</i>        | rs62253583    | 1.13E-06      | 1.11E-04     | 0.51           | 1.26E-03        |
| <i>AC103965.1</i>    | rs220333      | 2.72E-07      | 8.53E-05     | 0.27           | 1.32E-03        |
| <i>GMIP</i>          | rs880090      | 1.12E-07      | 1.20E-04     | 0.14           | 1.33E-03        |
| <i>HLA-DMA</i>       | rs116131925   | 2.00E-05      | 1.23E-04     | 0.16           | 1.33E-03        |
| <i>RERE</i>          | rs302719      | 2.77E-07      | 1.23E-04     | NA             | 1.33E-03        |
| <i>RP1-257I20.14</i> | rs5758645     | 2.21E-06      | 1.27E-04     | 0.58           | 1.35E-03        |
| <i>FKBPL</i>         | rs3130281     | 3.46E-05      | 1.30E-04     | 0.65           | 1.36E-03        |
| <i>RNASEH2C</i>      | rs1193851     | 1.12E-07      | 1.41E-04     | NA             | 1.46E-03        |
| <i>CLP1</i>          | rs708228      | 1.54E-06      | 1.70E-04     | NA             | 1.72E-03        |
| <i>CSNK2B</i>        | rs2857694     | 1.36E-05      | 1.81E-04     | 0.59           | 1.72E-03        |
| <i>DDX39BP2</i>      | rs3094724     | 2.27E-05      | 1.74E-04     | 0.21           | 1.72E-03        |
| <i>HLA-T</i>         | rs3129012     | 4.48E-05      | 1.81E-04     | 0.88           | 1.72E-03        |
| <i>HLA-U</i>         | rs1063320     | 3.24E-07      | 1.77E-04     | 0.06           | 1.72E-03        |
| <i>GOLGA6L5</i>      | rs12905223    | 1.27E-06      | 1.34E-04     | 0.34           | 1.77E-03        |
| <i>ALMS1P</i>        | rs11903916    | 5.99E-07      | 1.95E-04     | NA             | 1.79E-03        |



| <b>Gene</b>               | <b>topSNP</b> | <b>p_eQTL</b> | <b>p_SMR</b> | <b>p_HEIDI</b> | <b>adjp_SMR</b> |
|---------------------------|---------------|---------------|--------------|----------------|-----------------|
| <i>TRIM10</i>             | rs1059535     | 2.87E-05      | 1.93E-04     | 0.27           | 1.79E-03        |
| <i>IGSF9B</i>             | rs73036062    | 1.37E-05      | 1.98E-04     | NA             | 1.79E-03        |
| <i>BAG6</i>               | rs2857694     | 1.65E-05      | 2.01E-04     | 0.88           | 1.80E-03        |
| <i>SKIV2L</i>             | rs389883      | 1.05E-05      | 2.06E-04     | NA             | 1.81E-03        |
| <i>BAG5</i>               | rs4906336     | 1.60E-05      | 2.24E-04     | NA             | 1.95E-03        |
| <i>TDRD9</i>              | rs10132641    | 8.33E-06      | 2.29E-04     | NA             | 1.97E-03        |
| <i>ABCB9</i>              | rs7296418     | 7.94E-06      | 2.40E-04     | 0.16           | 2.02E-03        |
| <i>ZNF391</i>             | rs7750526     | 6.61E-05      | 2.41E-04     | 0.69           | 2.02E-03        |
| <i>HIST1H4H</i>           | rs61534839    | 1.04E-06      | 2.58E-04     | NA             | 2.10E-03        |
| <i>IFITM4P</i>            | rs416571      | 4.02E-06      | 2.61E-04     | NA             | 2.10E-03        |
| <i>MAU2</i>               | rs62135552    | 4.83E-06      | 2.60E-04     | NA             | 2.10E-03        |
| <i>XXbac-BPG181B23.7</i>  | rs9266244     | 7.35E-07      | 1.84E-04     | 0.43           | 2.12E-03        |
| <i>NT5DC2</i>             | rs13076193    | 2.20E-09      | 1.90E-04     | 0.06           | 2.15E-03        |
| <i>RP11-245J9.4</i>       | rs7615475     | 5.85E-06      | 2.85E-04     | 0.27           | 2.25E-03        |
| <i>ZSCAN9</i>             | rs9885928     | 1.88E-05      | 2.98E-04     | 0.22           | 2.32E-03        |
| <i>CLIC1</i>              | rs3115674     | 1.40E-04      | 3.09E-04     | 0.58           | 2.35E-03        |
| <i>LCAT</i>               | rs7204208     | 6.22E-09      | 3.06E-04     | NA             | 2.35E-03        |
| <i>STK19</i>              | rs74618856    | 3.45E-05      | 3.18E-04     | 0.80           | 2.40E-03        |
| <i>GUSBP2</i>             | rs9348746     | 2.80E-05      | 3.26E-04     | NA             | 2.43E-03        |
| <i>HLA-A</i>              | rs416571      | 5.40E-06      | 2.56E-04     | NA             | 2.55E-03        |
| <i>GDPD3</i>              | rs4424923     | 1.30E-05      | 3.57E-04     | NA             | 2.61E-03        |
| <i>MOG</i>                | rs3117289     | 8.66E-05      | 3.58E-04     | NA             | 2.61E-03        |
| <i>SH3RF1</i>             | rs4434205     | 1.06E-07      | 3.63E-04     | NA             | 2.62E-03        |
| <i>RP11-282O18.3</i>      | rs11057238    | 1.39E-05      | 4.20E-04     | 0.09           | 2.96E-03        |
| <i>AGER</i>               | rs3095240     | 1.43E-04      | 4.46E-04     | 0.82           | 2.99E-03        |
| <i>NMB</i>                | rs1051168     | 1.40E-05      | 4.39E-04     | 0.72           | 2.99E-03        |
| <i>RP11-350N15.5</i>      | rs72630609    | 1.25E-05      | 4.32E-04     | NA             | 2.99E-03        |
| <i>TCF19</i>              | rs2233960     | 9.19E-06      | 4.39E-04     | 0.36           | 2.99E-03        |
| <i>ZSCAN2</i>             | rs62021208    | 4.69E-06      | 4.43E-04     | 0.82           | 2.99E-03        |
| <i>HLA-C</i>              | rs114475699   | 4.77E-08      | 3.57E-04     | NA             | 3.02E-03        |
| <i>DDAH2</i>              | rs3130281     | 1.94E-04      | 4.79E-04     | 0.65           | 3.18E-03        |
| <i>TUBB</i>               | rs2523598     | 1.09E-04      | 4.87E-04     | 0.34           | 3.20E-03        |
| <i>HCG4P5</i>             | rs885945      | 4.29E-05      | 3.87E-04     | NA             | 3.21E-03        |
| <i>HCG27</i>              | rs114475699   | 8.52E-08      | 3.99E-04     | 0.57           | 3.26E-03        |
| <i>XXbac-BPG299F13.17</i> | rs9266244     | 7.07E-06      | 4.16E-04     | NA             | 3.36E-03        |
| <i>AGPAT1</i>             | rs204993      | 5.98E-05      | 5.18E-04     | NA             | 3.37E-03        |
| <i>HIST1H2AK</i>          | rs7739915     | 2.42E-04      | 5.33E-04     | 0.72           | 3.44E-03        |
| <i>VARS2</i>              | rs2853999     | 1.47E-04      | 4.85E-04     | NA             | 3.68E-03        |
| <i>BTN2A2</i>             | rs2073528     | 1.66E-04      | 5.79E-04     | NA             | 3.70E-03        |
| <i>ZSCAN12P1</i>          | rs1150666     | 7.63E-05      | 5.92E-04     | 0.48           | 3.74E-03        |
| <i>PCCB</i>               | rs9845788     | 2.10E-05      | 6.15E-04     | 0.35           | 3.85E-03        |
| <i>PEMT</i>               | rs9895335     | 3.73E-06      | 6.35E-04     | 0.90           | 3.94E-03        |
| <i>MPHOSPH9</i>           | rs941306      | 3.72E-05      | 6.46E-04     | 0.36           | 3.97E-03        |

| <b>Gene</b>          | <b>topSNP</b> | <b>p_eQTL</b> | <b>p_SMR</b> | <b>p_HEIDI</b> | <b>adjp_SMR</b> |
|----------------------|---------------|---------------|--------------|----------------|-----------------|
| <i>RP5-821D11.7</i>  | rs9607850     | 1.87E-05      | 6.65E-04     | NA             | 4.05E-03        |
| <i>LY6G6D</i>        | rs805303      | 1.74E-04      | 6.83E-04     | NA             | 4.12E-03        |
| <i>RP11-285J16.1</i> | rs73068054    | 2.81E-05      | 6.05E-04     | NA             | 4.22E-03        |
| <i>HCG18</i>         | rs6914215     | 1.37E-04      | 7.13E-04     | 0.78           | 4.27E-03        |
| <i>HLA-DOB</i>       | rs6906021     | 9.26E-05      | 7.58E-04     | NA             | 4.45E-03        |
| <i>ATP6V1G2</i>      | rs2736176     | 1.60E-04      | 7.66E-04     | NA             | 4.46E-03        |
| <i>BAG4</i>          | rs9198        | 4.97E-05      | 7.96E-04     | 0.90           | 4.59E-03        |
| <i>C2orf69</i>       | rs1658810     | 2.37E-04      | 8.01E-04     | NA             | 4.59E-03        |
| <i>RP11-10A14.5</i>  | rs2948293     | 1.37E-05      | 7.10E-04     | 0.33           | 4.73E-03        |
| <i>ZKSCAN4</i>       | rs3131095     | 5.78E-04      | 8.49E-04     | 0.84           | 4.82E-03        |
| <i>HLA-K</i>         | rs886424      | 4.82E-04      | 8.86E-04     | NA             | 4.99E-03        |
| <i>SDAD1P1</i>       | rs3808573     | 3.06E-05      | 9.01E-04     | NA             | 5.03E-03        |
| <i>APOPT1</i>        | rs58033365    | 1.89E-04      | 9.62E-04     | NA             | 5.18E-03        |
| <i>COL11A2</i>       | rs9268084     | 4.08E-04      | 9.62E-04     | NA             | 5.18E-03        |
| <i>DES11</i>         | rs9607850     | 4.37E-05      | 9.53E-04     | NA             | 5.18E-03        |
| <i>MAD1L1</i>        | rs6975354     | 7.08E-05      | 9.66E-04     | 0.21           | 5.18E-03        |
| <i>SLC44A4</i>       | rs622871      | 2.62E-04      | 9.41E-04     | NA             | 5.18E-03        |
| <i>RP11-73M18.7</i>  | rs11846404    | 2.16E-04      | 9.99E-04     | NA             | 5.27E-03        |
| <i>RPS12P26</i>      | rs35346340    | 7.65E-05      | 9.98E-04     | NA             | 5.27E-03        |
| <i>ITPR3</i>         | rs10947436    | 1.12E-04      | 1.03E-03     | NA             | 5.37E-03        |
| <i>U91328.19</i>     | rs13204572    | 6.60E-04      | 1.05E-03     | NA             | 5.44E-03        |
| <i>CALHM2</i>        | rs10430665    | 3.86E-04      | 1.06E-03     | 0.69           | 5.44E-03        |
| <i>HLA-DPB2</i>      | rs3134940     | 5.23E-04      | 1.09E-03     | 0.73           | 5.56E-03        |
| <i>MRPS21</i>        | rs55963510    | 5.22E-05      | 1.11E-03     | NA             | 5.61E-03        |
| <i>HIST1H2BD</i>     | rs9393698     | 9.80E-05      | 1.15E-03     | NA             | 5.76E-03        |
| <i>ZNF747</i>        | rs4788198     | 2.00E-04      | 1.15E-03     | NA             | 5.76E-03        |
| <i>MICA</i>          | rs9266209     | 3.10E-04      | 1.18E-03     | NA             | 5.86E-03        |
| <i>SLC12A4</i>       | rs7204208     | 5.46E-06      | 1.21E-03     | NA             | 5.96E-03        |
| <i>TOM1L2</i>        | rs9895335     | 2.68E-05      | 1.23E-03     | 0.52           | 5.99E-03        |
| <i>HSPA1B</i>        | rs389883      | 2.58E-04      | 1.25E-03     | NA             | 6.06E-03        |
| <i>ABHD16A</i>       | rs3130621     | 7.17E-04      | 1.32E-03     | NA             | 6.25E-03        |
| <i>HIST1H4E</i>      | rs9393698     | 1.26E-04      | 1.31E-03     | NA             | 6.25E-03        |
| <i>OR2H2</i>         | rs3094064     | 7.44E-04      | 1.31E-03     | NA             | 6.25E-03        |
| <i>ETF1</i>          | rs11745933    | 8.24E-05      | 1.35E-03     | NA             | 6.33E-03        |
| <i>HLA-DPB1</i>      | rs114132738   | 1.06E-04      | 1.35E-03     | NA             | 6.33E-03        |
| <i>ATXN7</i>         | rs7627690     | 1.59E-04      | 1.48E-03     | 0.43           | 6.82E-03        |
| <i>NDUFA6</i>        | rs5758645     | 2.70E-04      | 1.47E-03     | NA             | 6.82E-03        |
| <i>HIST1H2BF</i>     | rs9393698     | 1.69E-04      | 1.52E-03     | NA             | 6.88E-03        |
| <i>HIST1H4K</i>      | rs35501037    | 1.09E-03      | 1.52E-03     | NA             | 6.88E-03        |
| <i>PPT2</i>          | rs2280774     | 1.27E-04      | 1.52E-03     | NA             | 6.88E-03        |
| <i>AIF1</i>          | rs2857694     | 4.63E-04      | 1.57E-03     | NA             | 7.06E-03        |
| <i>ZDHHC5</i>        | rs682503      | 1.64E-04      | 1.59E-03     | NA             | 7.10E-03        |
| <i>HLA-F</i>         | rs1610589     | 4.87E-04      | 1.65E-03     | 0.95           | 7.14E-03        |

| <b>Gene</b>              | <b>topSNP</b> | <b>p_eQTL</b> | <b>p_SMR</b> | <b>p_HEIDI</b> | <b>adjp_SMR</b> |
|--------------------------|---------------|---------------|--------------|----------------|-----------------|
| <i>NEK1</i>              | rs4434205     | 3.14E-05      | 1.65E-03     | NA             | 7.14E-03        |
| <i>PRR12</i>             | rs10417980    | 1.25E-04      | 1.62E-03     | NA             | 7.14E-03        |
| <i>RNF39</i>             | rs3094724     | 6.37E-04      | 1.65E-03     | NA             | 7.14E-03        |
| <i>RNF5</i>              | rs6914215     | 4.97E-04      | 1.65E-03     | NA             | 7.14E-03        |
| <i>TRANK1</i>            | rs73068054    | 1.68E-04      | 1.71E-03     | NA             | 7.33E-03        |
| <i>GNL3</i>              | rs1029871     | 8.18E-05      | 1.78E-03     | NA             | 7.60E-03        |
| <i>NPIPB11</i>           | rs4424923     | 3.25E-04      | 1.86E-03     | NA             | 7.88E-03        |
| <i>LST1</i>              | rs1131165     | 5.48E-04      | 1.88E-03     | 0.88           | 7.88E-03        |
| <i>SPCS1</i>             | rs34017441    | 7.77E-05      | 1.88E-03     | NA             | 7.88E-03        |
| <i>GNA12</i>             | rs10263703    | 4.63E-04      | 2.07E-03     | NA             | 8.63E-03        |
| <i>HCG20</i>             | rs1610696     | 9.16E-04      | 2.17E-03     | NA             | 8.80E-03        |
| <i>RP11-73M18.9</i>      | rs3212090     | 7.04E-04      | 2.16E-03     | NA             | 8.80E-03        |
| <i>VWA7</i>              | rs805303      | 8.77E-04      | 2.13E-03     | NA             | 8.80E-03        |
| <i>Z83851.3</i>          | rs5758605     | 5.03E-04      | 2.19E-03     | NA             | 8.83E-03        |
| <i>ZBTB22</i>            | rs10947436    | 4.52E-04      | 2.24E-03     | NA             | 8.98E-03        |
| <i>SNORD35A</i>          | rs7047        | 5.06E-04      | 2.27E-03     | NA             | 9.05E-03        |
| <i>3-Sep</i>             | rs7290134     | 2.78E-04      | 2.29E-03     | NA             | 9.08E-03        |
| <i>TRPV4</i>             | rs3026445     | 3.28E-04      | 2.35E-03     | NA             | 9.28E-03        |
| <i>RP5-874C20.3</i>      | rs7776351     | 1.17E-03      | 2.38E-03     | NA             | 9.34E-03        |
| <i>LY6G5C</i>            | rs2075800     | 5.03E-04      | 1.88E-03     | NA             | 9.40E-03        |
| <i>HIST1H1T</i>          | rs198811      | 6.32E-04      | 2.54E-03     | NA             | 9.90E-03        |
| <i>HLA-W</i>             | rs3129055     | 8.36E-04      | 2.65E-03     | NA             | 1.02E-02        |
| <i>NDUFA13</i>           | rs880090      | 3.60E-04      | 2.65E-03     | NA             | 1.02E-02        |
| <i>XXbac-BPG252P9.10</i> | rs3094628     | 1.78E-03      | 2.68E-03     | NA             | 1.02E-02        |
| <i>ALG1L13P</i>          | rs2948293     | 2.09E-04      | 2.25E-03     | NA             | 1.03E-02        |
| <i>ZSCAN16-AS1</i>       | rs2275508     | 1.08E-03      | 2.75E-03     | NA             | 1.05E-02        |
| <i>APH1A</i>             | rs11589922    | 4.93E-04      | 2.81E-03     | NA             | 1.06E-02        |
| <i>ELMO3</i>             | rs6499157     | 8.89E-05      | 2.86E-03     | NA             | 1.08E-02        |
| <i>PGBD1</i>             | rs200983      | 2.02E-03      | 2.87E-03     | NA             | 1.08E-02        |
| <i>RP11-731C17.2</i>     | rs696520      | 8.72E-04      | 2.92E-03     | NA             | 1.09E-02        |
| <i>HIST1H4I</i>          | rs66972160    | 1.05E-03      | 2.98E-03     | NA             | 1.10E-02        |
| <i>ITIH3</i>             | rs4687663     | 5.07E-04      | 3.11E-03     | NA             | 1.15E-02        |
| <i>MDC1</i>              | rs1063320     | 5.04E-04      | 3.25E-03     | NA             | 1.18E-02        |
| <i>MED19</i>             | rs708228      | 7.63E-04      | 3.29E-03     | NA             | 1.18E-02        |
| <i>NDUFA6-AS1</i>        | rs6002597     | 7.31E-04      | 3.28E-03     | NA             | 1.18E-02        |
| <i>ZNF204P</i>           | rs9468350     | 2.15E-03      | 3.28E-03     | NA             | 1.18E-02        |
| <i>SLC4A1AP</i>          | rs4666014     | 2.06E-04      | 3.48E-03     | NA             | 1.25E-02        |
| <i>ATP13A1</i>           | rs7252981     | 9.56E-04      | 3.53E-03     | NA             | 1.25E-02        |
| <i>RP11-347C12.2</i>     | rs4424923     | 9.59E-04      | 3.54E-03     | NA             | 1.25E-02        |
| <i>CTRL</i>              | rs6499157     | 1.76E-04      | 3.65E-03     | NA             | 1.29E-02        |
| <i>CTA-989H11.1</i>      | rs134889      | 1.17E-03      | 3.71E-03     | NA             | 1.30E-02        |
| <i>TCF20</i>             | rs2143139     | 1.19E-03      | 3.73E-03     | NA             | 1.30E-02        |
| <i>RP3-477M7.5</i>       | rs302719      | 8.07E-04      | 3.75E-03     | NA             | 1.30E-02        |

| <b>Gene</b>               | <b>topSNP</b> | <b>p_eQTL</b> | <b>p_SMR</b> | <b>p_HEIDI</b> | <b>adjp_SMR</b> |
|---------------------------|---------------|---------------|--------------|----------------|-----------------|
| <i>PRRT1</i>              | rs9273595     | 2.35E-03      | 3.78E-03     | NA             | 1.30E-02        |
| <i>SFXN2</i>              | rs10883798    | 2.03E-03      | 3.90E-03     | NA             | 1.33E-02        |
| <i>ZNF785</i>             | rs4424923     | 1.12E-03      | 3.89E-03     | NA             | 1.33E-02        |
| <i>SPECC1</i>             | rs72843506    | 2.56E-04      | 3.31E-03     | NA             | 1.38E-02        |
| <i>RP11-196G18.3</i>      | rs11589922    | 9.61E-04      | 4.10E-03     | NA             | 1.40E-02        |
| <i>DFNA5</i>              | rs79210963    | 8.33E-04      | 4.27E-03     | NA             | 1.44E-02        |
| <i>LY6G6C</i>             | rs2395174     | 1.33E-03      | 4.28E-03     | NA             | 1.44E-02        |
| <i>HLA-J</i>              | rs885945      | 1.47E-03      | 3.67E-03     | NA             | 1.46E-02        |
| <i>SRR</i>                | rs11078018    | 1.16E-03      | 4.40E-03     | NA             | 1.47E-02        |
| <i>ABCF1</i>              | rs3129055     | 1.80E-03      | 4.46E-03     | NA             | 1.49E-02        |
| <i>MNT</i>                | rs11078018    | 1.21E-03      | 4.52E-03     | NA             | 1.50E-02        |
| <i>LRRFIP2</i>            | rs6769400     | 1.21E-03      | 4.56E-03     | NA             | 1.51E-02        |
| <i>DGKZ</i>               | rs876701      | 1.90E-03      | 4.62E-03     | NA             | 1.52E-02        |
| <i>CTA-250D10.23</i>      | rs133348      | 1.09E-03      | 4.64E-03     | NA             | 1.52E-02        |
| <i>WBP2NL</i>             | rs8135801     | 1.34E-03      | 4.70E-03     | NA             | 1.53E-02        |
| <i>ATF6B</i>              | rs3096690     | 3.68E-03      | 4.83E-03     | NA             | 1.55E-02        |
| <i>GTF2H4</i>             | rs3094125     | 3.52E-03      | 4.81E-03     | NA             | 1.55E-02        |
| <i>RP11-524F11.1</i>      | rs6826        | 6.46E-04      | 4.91E-03     | NA             | 1.57E-02        |
| <i>CUTA</i>               | rs209474      | 1.08E-03      | 4.94E-03     | NA             | 1.57E-02        |
| <i>MICD</i>               | rs1611350     | 2.62E-03      | 5.00E-03     | NA             | 1.57E-02        |
| <i>PAN2</i>               | rs61937595    | 1.96E-03      | 5.01E-03     | NA             | 1.57E-02        |
| <i>PPP1R18</i>            | rs6457375     | 2.24E-03      | 5.01E-03     | NA             | 1.57E-02        |
| <i>SF3B1</i>              | rs700664      | 1.51E-03      | 5.06E-03     | NA             | 1.57E-02        |
| <i>U91328.22</i>          | rs13196986    | 2.45E-03      | 5.06E-03     | NA             | 1.57E-02        |
| <i>RILPL2</i>             | rs883563      | 1.46E-03      | 5.17E-03     | NA             | 1.59E-02        |
| <i>ZNF184</i>             | rs13215020    | 3.47E-03      | 5.16E-03     | NA             | 1.59E-02        |
| <i>CFB</i>                | rs9269102     | 3.62E-03      | 5.21E-03     | NA             | 1.59E-02        |
| <i>C7orf50</i>            | rs7783715     | 1.25E-03      | 5.25E-03     | NA             | 1.60E-02        |
| <i>LGALS9B</i>            | rs72843506    | 5.88E-04      | 4.80E-03     | NA             | 1.70E-02        |
| <i>MIEF2</i>              | rs7219320     | 6.06E-04      | 4.83E-03     | NA             | 1.70E-02        |
| <i>OR2B6</i>              | rs7739915     | 4.09E-03      | 5.63E-03     | NA             | 1.71E-02        |
| <i>HIST1H1E</i>           | rs3757150     | 4.00E-03      | 5.66E-03     | NA             | 1.71E-02        |
| <i>C12orf65</i>           | rs11057238    | 1.88E-03      | 5.70E-03     | NA             | 1.71E-02        |
| <i>RCN3</i>               | rs7047        | 2.22E-03      | 5.81E-03     | NA             | 1.74E-02        |
| <i>HLA-DRA</i>            | rs9271562     | 2.79E-03      | 5.85E-03     | NA             | 1.74E-02        |
| <i>DPEP3</i>              | rs7204208     | 5.89E-04      | 5.87E-03     | NA             | 1.74E-02        |
| <i>USP32P3</i>            | rs72843506    | 6.48E-04      | 5.03E-03     | NA             | 1.74E-02        |
| <i>HLA-V</i>              | rs1610622     | 1.55E-03      | 6.01E-03     | NA             | 1.77E-02        |
| <i>NEU1</i>               | rs6908927     | 3.79E-03      | 6.02E-03     | NA             | 1.77E-02        |
| <i>XXbac-BPG299F13.14</i> | rs389883      | 1.21E-03      | 5.51E-03     | NA             | 1.83E-02        |
| <i>ACAD8</i>              | rs73034295    | 3.28E-03      | 6.27E-03     | NA             | 1.83E-02        |
| <i>RP11-62H7.2</i>        | rs1878561     | 1.20E-03      | 5.76E-03     | NA             | 1.88E-02        |
| <i>C6orf25</i>            | rs4249311     | 3.45E-03      | 6.57E-03     | NA             | 1.91E-02        |

| <b>Gene</b>          | <b>topSNP</b> | <b>p_eQTL</b> | <b>p_SMR</b> | <b>p_HEIDI</b> | <b>adjp_SMR</b> |
|----------------------|---------------|---------------|--------------|----------------|-----------------|
| <i>WBP1L</i>         | rs284854      | 1.84E-03      | 6.12E-03     | NA             | 1.91E-02        |
| <i>C11orf31</i>      | rs682503      | 2.12E-03      | 6.66E-03     | NA             | 1.91E-02        |
| <i>TRIM26</i>        | rs3129012     | 4.58E-03      | 6.63E-03     | NA             | 1.91E-02        |
| <i>HCG9</i>          | rs1610720     | 3.77E-03      | 6.75E-03     | NA             | 1.93E-02        |
| <i>ABT1</i>          | rs9348746     | 3.37E-03      | 6.85E-03     | NA             | 1.94E-02        |
| <i>IRF3</i>          | rs57940349    | 1.90E-03      | 6.79E-03     | NA             | 1.94E-02        |
| <i>RP5-1115A15.1</i> | rs301792      | 1.93E-03      | 6.84E-03     | NA             | 1.94E-02        |
| <i>SIPA1</i>         | rs1193851     | 1.92E-03      | 6.99E-03     | NA             | 1.97E-02        |
| <i>NAGA</i>          | rs5758605     | 3.06E-03      | 7.09E-03     | NA             | 1.99E-02        |
| <i>FCGR1C</i>        | rs72694955    | 2.25E-03      | 7.13E-03     | NA             | 1.99E-02        |
| <i>NCR3</i>          | rs9269102     | 5.25E-03      | 7.17E-03     | NA             | 1.99E-02        |
| <i>CHST12</i>        | rs7783715     | 2.20E-03      | 7.32E-03     | NA             | 2.01E-02        |
| <i>NIF3L1</i>        | rs1658810     | 4.53E-03      | 7.33E-03     | NA             | 2.01E-02        |
| <i>TMEM161A</i>      | rs2965199     | 3.43E-03      | 7.30E-03     | NA             | 2.01E-02        |
| <i>NHP2L1</i>        | rs5758605     | 3.32E-03      | 7.51E-03     | NA             | 2.05E-02        |
| <i>ZNF592</i>        | rs3803405     | 1.61E-03      | 7.61E-03     | NA             | 2.07E-02        |
| <i>KAT5</i>          | rs1193851     | 2.29E-03      | 7.75E-03     | NA             | 2.10E-02        |
| <i>LTA</i>           | rs2905737     | 2.35E-03      | 7.79E-03     | NA             | 2.11E-02        |
| <i>ANP32E</i>        | rs72694955    | 2.63E-03      | 7.86E-03     | NA             | 2.11E-02        |
| <i>EIF2B1</i>        | rs11057238    | 3.13E-03      | 7.96E-03     | NA             | 2.12E-02        |
| <i>HIST1H2BH</i>     | rs61534839    | 2.49E-03      | 8.02E-03     | NA             | 2.13E-02        |
| <i>DPEP2</i>         | rs6499157     | 1.22E-03      | 8.16E-03     | NA             | 2.15E-02        |
| <i>TMEM180</i>       | rs11818043    | 3.77E-03      | 8.35E-03     | NA             | 2.19E-02        |
| <i>HIST1H2AL</i>     | rs34130214    | 6.46E-03      | 8.45E-03     | NA             | 2.20E-02        |
| <i>PPM1M</i>         | rs2276834     | 2.86E-03      | 8.44E-03     | NA             | 2.20E-02        |
| <i>RP11-261C10.3</i> | rs12751210    | 2.75E-03      | 8.60E-03     | NA             | 2.23E-02        |
| <i>RPL32P1</i>       | rs9273595     | 6.25E-03      | 8.60E-03     | NA             | 2.23E-02        |
| <i>B3GALT4</i>       | rs707962      | 5.38E-03      | 8.75E-03     | NA             | 2.23E-02        |
| <i>NRM</i>           | rs1610622     | 2.90E-03      | 8.74E-03     | NA             | 2.23E-02        |
| <i>PSMD6-AS2</i>     | rs13272       | 3.55E-03      | 8.74E-03     | NA             | 2.23E-02        |
| <i>TRIM39</i>        | rs12665531    | 2.94E-03      | 8.75E-03     | NA             | 2.23E-02        |
| <i>EGFL8</i>         | rs2523554     | 4.63E-03      | 8.84E-03     | NA             | 2.24E-02        |
| <i>HIST1H2BN</i>     | rs4711163     | 5.83E-03      | 8.85E-03     | NA             | 2.24E-02        |
| <i>RAD9B</i>         | rs3026445     | 3.25E-03      | 8.89E-03     | NA             | 2.24E-02        |
| <i>PPP1R2P1</i>      | rs616187      | 4.31E-03      | 8.96E-03     | NA             | 2.25E-02        |
| <i>MEF2C-AS1</i>     | rs62378245    | 4.62E-03      | 9.06E-03     | NA             | 2.26E-02        |
| <i>VAMP3</i>         | rs11121178    | 3.13E-03      | 9.03E-03     | NA             | 2.26E-02        |
| <i>FOXP1</i>         | rs9842406     | 3.35E-03      | 9.18E-03     | NA             | 2.28E-02        |
| <i>BATF2</i>         | rs1193851     | 3.06E-03      | 9.23E-03     | NA             | 2.28E-02        |
| <i>SYNGAP1</i>       | rs9276915     | 3.68E-03      | 9.28E-03     | NA             | 2.29E-02        |
| <i>ATPAF2</i>        | rs4584886     | 2.32E-03      | 9.48E-03     | NA             | 2.33E-02        |
| <i>MSH5</i>          | rs2858310     | 4.20E-03      | 9.65E-03     | NA             | 2.36E-02        |
| <i>ARPC3</i>         | rs3026445     | 3.79E-03      | 9.80E-03     | NA             | 2.38E-02        |

| <b>Gene</b>              | <b>topSNP</b> | <b>p_eQTL</b> | <b>p_SMR</b> | <b>p_HEIDI</b> | <b>adjp_SMR</b> |
|--------------------------|---------------|---------------|--------------|----------------|-----------------|
| <i>DDHD2</i>             | rs2016875     | 4.10E-03      | 9.86E-03     | NA             | 2.38E-02        |
| <i>TM2D2</i>             | rs9198        | 4.17E-03      | 9.81E-03     | NA             | 2.38E-02        |
| <i>TULP3</i>             | rs68089646    | 3.79E-03      | 9.85E-03     | NA             | 2.38E-02        |
| <i>OGFOD2</i>            | rs4148863     | 5.31E-03      | 9.91E-03     | NA             | 2.38E-02        |
| <i>SPATS2L</i>           | rs3769456     | 4.82E-03      | 9.94E-03     | NA             | 2.38E-02        |
| <i>NELFE</i>             | rs204990      | 7.72E-03      | 9.97E-03     | NA             | 2.38E-02        |
| <i>RP11-677M14.3</i>     | rs12293624    | 4.06E-03      | 1.00E-02     | NA             | 2.38E-02        |
| <i>RFXANK</i>            | rs880090      | 3.74E-03      | 1.01E-02     | NA             | 2.39E-02        |
| <i>XXbac-BPG249D20.9</i> | rs28744244    | 4.07E-03      | 1.02E-02     | NA             | 2.40E-02        |
| <i>PAQR5</i>             | rs28620094    | 3.84E-03      | 1.03E-02     | NA             | 2.42E-02        |
| <i>ZSCAN16</i>           | rs34130214    | 8.14E-03      | 1.04E-02     | NA             | 2.42E-02        |
| <i>WBP1</i>              | rs11903916    | 3.98E-03      | 1.04E-02     | NA             | 2.43E-02        |
| <i>RP3-370M22.8</i>      | rs11705236    | 5.05E-03      | 1.07E-02     | NA             | 2.47E-02        |
| <i>HLA-DPA1</i>          | rs9270665     | 6.26E-03      | 1.08E-02     | NA             | 2.47E-02        |
| <i>TAPSAR1</i>           | rs34434863    | 4.88E-03      | 1.08E-02     | NA             | 2.47E-02        |
| <i>ZNRD1</i>             | rs2106072     | 8.74E-03      | 1.07E-02     | NA             | 2.47E-02        |
| <i>HIST1H3E</i>          | rs2073526     | 5.00E-03      | 1.10E-02     | NA             | 2.50E-02        |
| <i>NFKBIL1</i>           | rs12665531    | 4.22E-03      | 1.10E-02     | NA             | 2.50E-02        |
| <i>PSMB8</i>             | rs4947350     | 6.74E-03      | 1.11E-02     | NA             | 2.51E-02        |
| <i>RP11-571M6.8</i>      | rs324017      | 5.62E-03      | 1.11E-02     | NA             | 2.51E-02        |
| <i>RP4-756G23.5</i>      | rs5758645     | 5.89E-03      | 1.12E-02     | NA             | 2.51E-02        |
| <i>ATF4</i>              | rs5757717     | 5.69E-03      | 1.12E-02     | NA             | 2.51E-02        |
| <i>RP11-425L10.1</i>     | rs7130141     | 6.53E-03      | 1.12E-02     | NA             | 2.51E-02        |
| <i>DEPDC1B</i>           | rs4604142     | 7.24E-03      | 1.14E-02     | NA             | 2.54E-02        |
| <i>NR1H2</i>             | rs7047        | 5.99E-03      | 1.16E-02     | NA             | 2.57E-02        |
| <i>CNGB1</i>             | rs12447860    | 5.95E-03      | 1.17E-02     | NA             | 2.58E-02        |
| <i>PRR3</i>              | rs3129986     | 9.22E-03      | 1.17E-02     | NA             | 2.58E-02        |
| <i>TMX2</i>              | rs708228      | 5.61E-03      | 1.18E-02     | NA             | 2.59E-02        |
| <i>INHBE</i>             | rs61937595    | 6.70E-03      | 1.21E-02     | NA             | 2.63E-02        |
| <i>SDCCAG8</i>           | rs12751210    | 4.78E-03      | 1.21E-02     | NA             | 2.64E-02        |
| <i>RPS18</i>             | rs176249      | 5.14E-03      | 1.22E-02     | NA             | 2.65E-02        |
| <i>SNRNP35</i>           | rs1790119     | 5.66E-03      | 1.23E-02     | NA             | 2.66E-02        |
| <i>MICE</i>              | rs1633081     | 7.44E-03      | 1.24E-02     | NA             | 2.67E-02        |
| <i>RFT1</i>              | rs7638524     | 4.88E-03      | 1.24E-02     | NA             | 2.67E-02        |
| <i>ERCC8</i>             | rs4604142     | 8.08E-03      | 1.25E-02     | NA             | 2.67E-02        |
| <i>ALDH16A1</i>          | rs7047        | 6.72E-03      | 1.26E-02     | NA             | 2.68E-02        |
| <i>C6orf48</i>           | rs1046089     | 9.00E-03      | 1.28E-02     | NA             | 2.68E-02        |
| <i>CTSW</i>              | rs1193851     | 5.15E-03      | 1.28E-02     | NA             | 2.68E-02        |
| <i>RGL2</i>              | rs9271562     | 7.88E-03      | 1.28E-02     | NA             | 2.68E-02        |
| <i>RP11-894P9.1</i>      | rs1799796     | 7.95E-03      | 1.27E-02     | NA             | 2.68E-02        |
| <i>SERPING1</i>          | rs708228      | 6.24E-03      | 1.27E-02     | NA             | 2.68E-02        |
| <i>WDR81</i>             | rs8076939     | 5.20E-03      | 1.27E-02     | NA             | 2.68E-02        |
| <i>RP4-778K6.3</i>       | rs6968335     | 5.69E-03      | 1.30E-02     | NA             | 2.71E-02        |

| <b>Gene</b>             | <b>topSNP</b> | <b>p_eQTL</b> | <b>p_SMR</b> | <b>p_HEIDI</b> | <b>adjp_SMR</b> |
|-------------------------|---------------|---------------|--------------|----------------|-----------------|
| <i>SGK223</i>           | rs1878561     | 3.10E-03      | 9.86E-03     | NA             | 2.71E-02        |
| <i>SLURP1</i>           | rs72687376    | 5.91E-03      | 1.31E-02     | NA             | 2.73E-02        |
| <i>C16orf93</i>         | rs4788198     | 7.69E-03      | 1.33E-02     | NA             | 2.73E-02        |
| <i>C1orf116</i>         | rs12749612    | 4.24E-03      | 1.32E-02     | NA             | 2.73E-02        |
| <i>HIST1H4J</i>         | rs4711163     | 9.51E-03      | 1.33E-02     | NA             | 2.73E-02        |
| <i>TAPBP</i>            | rs511515      | 5.73E-03      | 1.33E-02     | NA             | 2.73E-02        |
| <i>HCG4P11</i>          | rs1610622     | 5.75E-03      | 1.35E-02     | NA             | 2.74E-02        |
| <i>MED25</i>            | rs7047        | 7.32E-03      | 1.34E-02     | NA             | 2.74E-02        |
| <i>PHF1</i>             | rs4947350     | 8.62E-03      | 1.35E-02     | NA             | 2.74E-02        |
| <i>TNFRSF13C</i>        | rs133348      | 6.00E-03      | 1.34E-02     | NA             | 2.74E-02        |
| <i>FAM83G</i>           | rs11078410    | 4.02E-03      | 1.38E-02     | NA             | 2.80E-02        |
| <i>SLC47A1</i>          | rs72843506    | 2.91E-03      | 1.08E-02     | NA             | 2.83E-02        |
| <i>HIST1H2AC</i>        | rs1179087     | 7.32E-03      | 1.41E-02     | NA             | 2.85E-02        |
| <i>HLA-B</i>            | rs2233960     | 2.89E-03      | 1.13E-02     | NA             | 2.88E-02        |
| <i>TAP2</i>             | rs1770        | 6.71E-03      | 1.44E-02     | NA             | 2.90E-02        |
| <i>ATG13</i>            | rs12574918    | 7.48E-03      | 1.47E-02     | NA             | 2.92E-02        |
| <i>CDH1</i>             | rs7187202     | 6.16E-03      | 1.46E-02     | NA             | 2.92E-02        |
| <i>CTSK</i>             | rs7544145     | 6.72E-03      | 1.47E-02     | NA             | 2.92E-02        |
| <i>RP1-34B20.4</i>      | rs9393698     | 7.35E-03      | 1.47E-02     | NA             | 2.92E-02        |
| <i>FGFR1</i>            | rs17435276    | 5.25E-03      | 1.48E-02     | NA             | 2.93E-02        |
| <i>LYPLA2P1</i>         | rs756139      | 7.70E-03      | 1.49E-02     | NA             | 2.95E-02        |
| <i>HSPA1A</i>           | rs616187      | 8.75E-03      | 1.50E-02     | NA             | 2.96E-02        |
| <i>HIST2H2AC</i>        | rs72694965    | 7.99E-03      | 1.51E-02     | NA             | 2.97E-02        |
| <i>DOPEY1</i>           | rs4470825     | 7.78E-03      | 1.57E-02     | NA             | 3.07E-02        |
| <i>GPANK1</i>           | rs2233974     | 1.21E-02      | 1.57E-02     | NA             | 3.07E-02        |
| <i>SAPCD1</i>           | rs3095240     | 1.23E-02      | 1.57E-02     | NA             | 3.07E-02        |
| <i>ZNF165</i>           | rs1150666     | 1.01E-02      | 1.59E-02     | NA             | 3.08E-02        |
| <i>BTN3A3</i>           | rs61534839    | 7.54E-03      | 1.62E-02     | NA             | 3.09E-02        |
| <i>EHMT2</i>            | rs1131156     | 9.71E-03      | 1.61E-02     | NA             | 3.09E-02        |
| <i>GOLPH3L</i>          | rs7544145     | 7.76E-03      | 1.62E-02     | NA             | 3.09E-02        |
| <i>HCG4P7</i>           | rs9257834     | 7.63E-03      | 1.63E-02     | NA             | 3.09E-02        |
| <i>HIST1H2AH</i>        | rs34130214    | 1.36E-02      | 1.64E-02     | NA             | 3.09E-02        |
| <i>HIST1H4C</i>         | rs3757150     | 1.34E-02      | 1.64E-02     | NA             | 3.09E-02        |
| <i>SNX32</i>            | rs1193851     | 7.54E-03      | 1.64E-02     | NA             | 3.09E-02        |
| <i>TRIM8</i>            | rs11191356    | 8.61E-03      | 1.61E-02     | NA             | 3.09E-02        |
| <i>UBE3B</i>            | rs3026445     | 8.10E-03      | 1.63E-02     | NA             | 3.09E-02        |
| <i>XXbac-BPG252P9.9</i> | rs1632855     | 1.32E-02      | 1.61E-02     | NA             | 3.09E-02        |
| <i>NAB2</i>             | rs324017      | 9.64E-03      | 1.65E-02     | NA             | 3.10E-02        |
| <i>MARCKSL1P1</i>       | rs34747231    | 1.26E-02      | 1.66E-02     | NA             | 3.12E-02        |
| <i>DAXX</i>             | rs210133      | 1.03E-02      | 1.68E-02     | NA             | 3.14E-02        |
| <i>LEMD2</i>            | rs116131925   | 1.30E-02      | 1.68E-02     | NA             | 3.14E-02        |
| <i>HIST1H1B</i>         | rs7750526     | 1.37E-02      | 1.71E-02     | NA             | 3.16E-02        |
| <i>NEAT1</i>            | rs1193851     | 8.03E-03      | 1.71E-02     | NA             | 3.16E-02        |

| <b>Gene</b>          | <b>topSNP</b> | <b>p_eQTL</b> | <b>p_SMR</b> | <b>p_HEIDI</b> | <b>adjp_SMR</b> |
|----------------------|---------------|---------------|--------------|----------------|-----------------|
| <i>RP11-434P11.2</i> | rs11903916    | 8.45E-03      | 1.72E-02     | NA             | 3.16E-02        |
| <i>ZNF192P1</i>      | rs9301        | 1.22E-02      | 1.72E-02     | NA             | 3.16E-02        |
| <i>RP4-669P10.16</i> | rs7290134     | 8.52E-03      | 1.72E-02     | NA             | 3.17E-02        |
| <i>SLC39A7</i>       | rs9274558     | 1.04E-02      | 1.73E-02     | NA             | 3.17E-02        |
| <i>SNX7</i>          | rs4970719     | 1.06E-02      | 1.75E-02     | NA             | 3.19E-02        |
| <i>LTB</i>           | rs1003878     | 1.32E-02      | 1.78E-02     | NA             | 3.24E-02        |
| <i>ELL</i>           | rs2905432     | 1.16E-02      | 1.79E-02     | NA             | 3.24E-02        |
| <i>DRG2</i>          | rs9895335     | 7.43E-03      | 1.79E-02     | NA             | 3.25E-02        |
| <i>PCNXL3</i>        | rs1193851     | 8.68E-03      | 1.80E-02     | NA             | 3.25E-02        |
| <i>C10orf32</i>      | rs284856      | 8.32E-03      | 1.82E-02     | NA             | 3.28E-02        |
| <i>ITGAL</i>         | rs4788198     | 1.16E-02      | 1.82E-02     | NA             | 3.28E-02        |
| <i>FBN2</i>          | rs2764766     | 5.44E-03      | 1.88E-02     | NA             | 3.37E-02        |
| <i>RP11-455F5.4</i>  | rs4788198     | 1.25E-02      | 1.92E-02     | NA             | 3.41E-02        |
| <i>SUGP2</i>         | rs1054930     | 1.24E-02      | 1.92E-02     | NA             | 3.41E-02        |
| <i>SLC43A2</i>       | rs9909895     | 1.09E-02      | 1.93E-02     | NA             | 3.43E-02        |
| <i>RPL3P2</i>        | rs2523673     | 1.29E-02      | 1.94E-02     | NA             | 3.43E-02        |
| <i>TLE3</i>          | rs2137272     | 7.60E-03      | 1.95E-02     | NA             | 3.44E-02        |
| <i>APOM</i>          | rs3094014     | 1.61E-02      | 1.98E-02     | NA             | 3.45E-02        |
| <i>BTN1A1</i>        | rs6456728     | 1.66E-02      | 1.99E-02     | NA             | 3.45E-02        |
| <i>CS</i>            | rs324015      | 1.24E-02      | 1.98E-02     | NA             | 3.45E-02        |
| <i>IBTK</i>          | rs4470825     | 1.08E-02      | 1.98E-02     | NA             | 3.45E-02        |
| <i>PMM1</i>          | rs7290134     | 1.05E-02      | 1.99E-02     | NA             | 3.45E-02        |
| <i>SPDYA</i>         | rs13001060    | 8.39E-03      | 1.98E-02     | NA             | 3.45E-02        |
| <i>ZNF101</i>        | rs880090      | 1.05E-02      | 2.00E-02     | NA             | 3.46E-02        |
| <i>PHF5A</i>         | rs5996116     | 1.17E-02      | 2.01E-02     | NA             | 3.46E-02        |
| <i>RANP1</i>         | rs1737048     | 1.50E-02      | 2.01E-02     | NA             | 3.46E-02        |
| <i>1-Sep</i>         | rs4788198     | 1.32E-02      | 2.01E-02     | NA             | 3.46E-02        |
| <i>RP11-7807.2</i>   | rs72843506    | 6.40E-03      | 1.70E-02     | NA             | 3.49E-02        |
| <i>AC104695.3</i>    | rs4632296     | 8.77E-03      | 2.04E-02     | NA             | 3.50E-02        |
| <i>ACD</i>           | rs56303487    | 8.12E-03      | 2.06E-02     | NA             | 3.50E-02        |
| <i>RP11-261C10.7</i> | rs12751210    | 1.06E-02      | 2.06E-02     | NA             | 3.50E-02        |
| <i>RPRD2</i>         | rs7521783     | 1.21E-02      | 2.05E-02     | NA             | 3.50E-02        |
| <i>SLC39A8</i>       | rs13107325    | 1.59E-02      | 2.07E-02     | NA             | 3.50E-02        |
| <i>ZSCAN31</i>       | rs2747054     | 1.83E-02      | 2.08E-02     | NA             | 3.51E-02        |
| <i>CTC-559E9.5</i>   | rs62135552    | 1.26E-02      | 2.10E-02     | NA             | 3.54E-02        |
| <i>CLK1</i>          | rs281771      | 1.61E-02      | 2.12E-02     | NA             | 3.57E-02        |
| <i>DXO</i>           | rs9276905     | 1.13E-02      | 2.13E-02     | NA             | 3.58E-02        |
| <i>RP1-86C11.7</i>   | rs16897515    | 1.90E-02      | 2.14E-02     | NA             | 3.59E-02        |
| <i>CYP17A1</i>       | rs10883823    | 1.62E-02      | 2.17E-02     | NA             | 3.61E-02        |
| <i>TVP23B</i>        | rs11078400    | 9.26E-03      | 2.17E-02     | NA             | 3.61E-02        |
| <i>VAR5</i>          | rs7195        | 1.47E-02      | 2.17E-02     | NA             | 3.61E-02        |
| <i>RP11-455F5.3</i>  | rs4788198     | 1.46E-02      | 2.18E-02     | NA             | 3.61E-02        |
| <i>ZNF14</i>         | rs7249692     | 1.36E-02      | 2.18E-02     | NA             | 3.61E-02        |



| <b>Gene</b>               | <b>topSNP</b> | <b>p_eQTL</b> | <b>p_SMR</b> | <b>p_HEIDI</b> | <b>adjp_SMR</b> |
|---------------------------|---------------|---------------|--------------|----------------|-----------------|
| <i>MADD</i>               | rs61882682    | 1.53E-02      | 2.21E-02     | NA             | 3.65E-02        |
| <i>ALPK3</i>              | rs7237        | 9.57E-03      | 2.24E-02     | NA             | 3.65E-02        |
| <i>ATAT1</i>              | rs2523673     | 1.56E-02      | 2.26E-02     | NA             | 3.65E-02        |
| <i>EIF3B</i>              | rs6975354     | 1.35E-02      | 2.26E-02     | NA             | 3.65E-02        |
| <i>GLS2</i>               | rs61937595    | 1.49E-02      | 2.23E-02     | NA             | 3.65E-02        |
| <i>HARBI1</i>             | rs35324223    | 1.60E-02      | 2.25E-02     | NA             | 3.65E-02        |
| <i>HCG4B</i>              | rs1610721     | 1.70E-02      | 2.29E-02     | NA             | 3.65E-02        |
| <i>HIST1H2AG</i>          | rs45527431    | 2.06E-02      | 2.27E-02     | NA             | 3.65E-02        |
| <i>HSPA1L</i>             | rs616187      | 1.50E-02      | 2.28E-02     | NA             | 3.65E-02        |
| <i>NUDT3</i>              | rs9394145     | 1.26E-02      | 2.25E-02     | NA             | 3.65E-02        |
| <i>PITPNA</i>             | rs9893573     | 1.21E-02      | 2.24E-02     | NA             | 3.65E-02        |
| <i>RP3-425P12.4</i>       | rs198811      | 1.49E-02      | 2.28E-02     | NA             | 3.65E-02        |
| <i>TOP3A</i>              | rs4584886     | 1.03E-02      | 2.28E-02     | NA             | 3.65E-02        |
| <i>ZDHHC20P1</i>          | rs3129055     | 1.56E-02      | 2.26E-02     | NA             | 3.65E-02        |
| <i>ALAS1</i>              | rs2581819     | 1.59E-02      | 2.31E-02     | NA             | 3.67E-02        |
| <i>GDPGP1</i>             | rs6227        | 1.42E-02      | 2.30E-02     | NA             | 3.67E-02        |
| <i>TNF</i>                | rs1800629     | 1.85E-02      | 2.32E-02     | NA             | 3.69E-02        |
| <i>C1orf132</i>           | rs2745977     | 1.11E-02      | 2.33E-02     | NA             | 3.69E-02        |
| <i>GPR146</i>             | rs12671113    | 1.61E-02      | 2.34E-02     | NA             | 3.69E-02        |
| <i>RPS3P2</i>             | rs208818      | 1.55E-02      | 2.35E-02     | NA             | 3.69E-02        |
| <i>SLC39A5</i>            | rs324015      | 1.55E-02      | 2.35E-02     | NA             | 3.69E-02        |
| <i>XXbac-BPG157A10.21</i> | rs3129877     | 1.51E-02      | 2.35E-02     | NA             | 3.69E-02        |
| <i>HIST1H2BL</i>          | rs200983      | 2.10E-02      | 2.36E-02     | NA             | 3.70E-02        |
| <i>Y_RNA</i>              | rs2428498     | 1.47E-02      | 2.41E-02     | NA             | 3.76E-02        |
| <i>RTN4RL1</i>            | rs9893573     | 1.38E-02      | 2.45E-02     | NA             | 3.82E-02        |
| <i>CTB-152G17.6</i>       | rs6968335     | 1.44E-02      | 2.47E-02     | NA             | 3.83E-02        |
| <i>RP11-73M18.6</i>       | rs58033365    | 1.78E-02      | 2.47E-02     | NA             | 3.83E-02        |
| <i>GYS1</i>               | rs10417980    | 1.40E-02      | 2.48E-02     | NA             | 3.84E-02        |
| <i>CETN3</i>              | rs6891794     | 1.75E-02      | 2.50E-02     | NA             | 3.84E-02        |
| <i>FLCN</i>               | rs6826        | 1.22E-02      | 2.52E-02     | NA             | 3.84E-02        |
| <i>NFAM1</i>              | rs1807494     | 1.58E-02      | 2.51E-02     | NA             | 3.84E-02        |
| <i>SBP1</i>               | rs2858310     | 1.58E-02      | 2.49E-02     | NA             | 3.84E-02        |
| <i>TMEM243</i>            | rs73206909    | 1.58E-02      | 2.51E-02     | NA             | 3.84E-02        |
| <i>TNXB</i>               | rs2858328     | 1.65E-02      | 2.52E-02     | NA             | 3.84E-02        |
| <i>CTSS</i>               | rs7521783     | 1.61E-02      | 2.54E-02     | NA             | 3.87E-02        |
| <i>SPOCK1</i>             | rs256013      | 1.48E-02      | 2.55E-02     | NA             | 3.87E-02        |
| <i>ASPDH</i>              | rs57940349    | 1.46E-02      | 2.56E-02     | NA             | 3.87E-02        |
| <i>ADIPOR2</i>            | rs68089646    | 1.55E-02      | 2.59E-02     | NA             | 3.88E-02        |
| <i>BAP1</i>               | rs11235       | 1.62E-02      | 2.57E-02     | NA             | 3.88E-02        |
| <i>CDC25C</i>             | rs256013      | 1.52E-02      | 2.59E-02     | NA             | 3.88E-02        |
| <i>KCTD9</i>              | rs1042992     | 1.61E-02      | 2.59E-02     | NA             | 3.88E-02        |
| <i>TIMM10</i>             | rs708228      | 1.66E-02      | 2.60E-02     | NA             | 3.88E-02        |
| <i>HIST1H2BJ</i>          | rs198811      | 1.78E-02      | 2.61E-02     | NA             | 3.89E-02        |

| <b>Gene</b>          | <b>topSNP</b> | <b>p_eQTL</b> | <b>p_SMR</b> | <b>p_HEIDI</b> | <b>adjp_SMR</b> |
|----------------------|---------------|---------------|--------------|----------------|-----------------|
| <i>HIST1H3J</i>      | rs1225715     | 1.97E-02      | 2.61E-02     | NA             | 3.89E-02        |
| <i>DIS3L2</i>        | rs974321      | 2.10E-02      | 2.66E-02     | NA             | 3.94E-02        |
| <i>LY6G6E</i>        | rs6457375     | 1.95E-02      | 2.65E-02     | NA             | 3.94E-02        |
| <i>STAB1</i>         | rs352139      | 9.81E-03      | 2.66E-02     | NA             | 3.94E-02        |
| <i>IDH2</i>          | rs4702        | 1.95E-02      | 2.68E-02     | NA             | 3.94E-02        |
| <i>NGRN</i>          | rs35346340    | 1.70E-02      | 2.68E-02     | NA             | 3.94E-02        |
| <i>RING1</i>         | rs511515      | 1.58E-02      | 2.68E-02     | NA             | 3.94E-02        |
| <i>C1orf51</i>       | rs72694955    | 1.64E-02      | 2.70E-02     | NA             | 3.95E-02        |
| <i>DBP</i>           | rs10417980    | 1.59E-02      | 2.71E-02     | NA             | 3.95E-02        |
| <i>HIST1H3B</i>      | rs9393716     | 2.10E-02      | 2.72E-02     | NA             | 3.95E-02        |
| <i>NPTXR</i>         | rs1883123     | 1.87E-02      | 2.71E-02     | NA             | 3.95E-02        |
| <i>SUMO2P1</i>       | rs9885928     | 1.95E-02      | 2.73E-02     | NA             | 3.95E-02        |
| <i>TAP1</i>          | rs9276905     | 1.59E-02      | 2.72E-02     | NA             | 3.95E-02        |
| <i>UBE2Q2P1</i>      | rs11633450    | 1.59E-02      | 2.71E-02     | NA             | 3.95E-02        |
| <i>ZFYVE21</i>       | rs4906336     | 2.03E-02      | 2.74E-02     | NA             | 3.96E-02        |
| <i>HIST1H1PS1</i>    | rs198811      | 1.89E-02      | 2.75E-02     | NA             | 3.96E-02        |
| <i>EIF4EBP1</i>      | rs16887340    | 1.78E-02      | 2.76E-02     | NA             | 3.97E-02        |
| <i>RP11-209D14.4</i> | rs72843506    | 1.09E-02      | 2.36E-02     | NA             | 3.98E-02        |
| <i>FAM53C</i>        | rs1811371     | 1.64E-02      | 2.79E-02     | NA             | 3.99E-02        |
| <i>HCG11</i>         | rs2073526     | 1.81E-02      | 2.79E-02     | NA             | 3.99E-02        |
| <i>SEMA6C</i>        | rs12124898    | 1.71E-02      | 2.80E-02     | NA             | 4.00E-02        |
| <i>SREBF2</i>        | rs5751220     | 1.72E-02      | 2.82E-02     | NA             | 4.03E-02        |
| <i>GBF1</i>          | rs284856      | 1.62E-02      | 2.86E-02     | NA             | 4.08E-02        |
| <i>OBFC1</i>         | rs4917994     | 2.29E-02      | 2.93E-02     | NA             | 4.16E-02        |
| <i>ABHD14B</i>       | rs9836499     | 1.99E-02      | 2.94E-02     | NA             | 4.16E-02        |
| <i>BRD2</i>          | rs9275109     | 1.89E-02      | 2.96E-02     | NA             | 4.18E-02        |
| <i>HLA-DMB</i>       | rs1003878     | 2.39E-02      | 2.96E-02     | NA             | 4.18E-02        |
| <i>ADAP1</i>         | rs7783715     | 1.82E-02      | 2.97E-02     | NA             | 4.18E-02        |
| <i>HIST1H3G</i>      | rs501220      | 2.46E-02      | 2.98E-02     | NA             | 4.18E-02        |
| <i>KHK</i>           | rs12474906    | 1.71E-02      | 2.98E-02     | NA             | 4.18E-02        |
| <i>HIST1H2BM</i>     | rs9468350     | 2.63E-02      | 2.99E-02     | NA             | 4.18E-02        |
| <i>SNHG17</i>        | rs12625702    | 1.95E-02      | 3.00E-02     | NA             | 4.18E-02        |
| <i>KCNIP2</i>        | rs284857      | 1.79E-02      | 3.01E-02     | NA             | 4.19E-02        |
| <i>CLCN3</i>         | rs4434205     | 1.52E-02      | 3.03E-02     | NA             | 4.20E-02        |
| <i>PEX16</i>         | rs11038864    | 2.09E-02      | 3.04E-02     | NA             | 4.20E-02        |
| <i>SLC35E2B</i>      | rs942820      | 2.11E-02      | 3.03E-02     | NA             | 4.20E-02        |
| <i>SV2A</i>          | rs72694962    | 1.96E-02      | 3.04E-02     | NA             | 4.20E-02        |
| <i>GLT8D1</i>        | rs2276834     | 1.92E-02      | 3.06E-02     | NA             | 4.22E-02        |
| <i>GNL1</i>          | rs9501082     | 2.06E-02      | 3.08E-02     | NA             | 4.23E-02        |
| <i>AKT3</i>          | rs3006916     | 1.93E-02      | 3.14E-02     | NA             | 4.25E-02        |
| <i>CBFB</i>          | rs56303487    | 1.57E-02      | 3.11E-02     | NA             | 4.25E-02        |
| <i>FCGRT</i>         | rs7047        | 2.20E-02      | 3.11E-02     | NA             | 4.25E-02        |
| <i>HIC1</i>          | rs11078018    | 2.07E-02      | 3.12E-02     | NA             | 4.25E-02        |

| <b>Gene</b>           | <b>topSNP</b> | <b>p_eQTL</b> | <b>p_SMR</b> | <b>p_HEIDI</b> | <b>adjp_SMR</b> |
|-----------------------|---------------|---------------|--------------|----------------|-----------------|
| <i>HIST1H2AE</i>      | rs66972160    | 2.38E-02      | 3.14E-02     | NA             | 4.25E-02        |
| <i>RBKS</i>           | rs12474906    | 1.84E-02      | 3.14E-02     | NA             | 4.25E-02        |
| <i>RP11-196G18.22</i> | rs72694955    | 2.00E-02      | 3.13E-02     | NA             | 4.25E-02        |
| <i>RP11-54A4.2</i>    | rs72694955    | 2.01E-02      | 3.14E-02     | NA             | 4.25E-02        |
| <i>WDR46</i>          | rs1003878     | 2.52E-02      | 3.10E-02     | NA             | 4.25E-02        |
| <i>DCP1A</i>          | rs2019065     | 1.74E-02      | 3.16E-02     | NA             | 4.26E-02        |
| <i>BTBD1</i>          | rs2135551     | 1.98E-02      | 3.17E-02     | NA             | 4.26E-02        |
| <i>HYAL3</i>          | rs9852677     | 7.82E-04      | 3.17E-02     | NA             | 4.26E-02        |
| <i>TAC3</i>           | rs324015      | 2.28E-02      | 3.19E-02     | NA             | 4.27E-02        |
| <i>ZBTB9</i>          | rs73409643    | 2.71E-02      | 3.20E-02     | NA             | 4.29E-02        |
| <i>FAM213B</i>        | rs942820      | 2.27E-02      | 3.22E-02     | NA             | 4.29E-02        |
| <i>HLA-DOA</i>        | rs9394145     | 2.10E-02      | 3.27E-02     | NA             | 4.35E-02        |
| <i>BTN2A3P</i>        | rs66972160    | 2.51E-02      | 3.28E-02     | NA             | 4.36E-02        |
| <i>ACO2</i>           | rs9607850     | 2.15E-02      | 3.33E-02     | NA             | 4.42E-02        |
| <i>MIR4519</i>        | rs4424923     | 2.39E-02      | 3.38E-02     | NA             | 4.46E-02        |
| <i>FUT1</i>           | rs57940349    | 2.15E-02      | 3.38E-02     | NA             | 4.46E-02        |
| <i>PPP1R11</i>        | rs9257834     | 2.21E-02      | 3.45E-02     | NA             | 4.54E-02        |
| <i>EPC2</i>           | rs76355118    | 2.03E-02      | 3.22E-02     | NA             | 4.58E-02        |
| <i>PITPNM2</i>        | rs7296418     | 2.57E-02      | 3.50E-02     | NA             | 4.59E-02        |
| <i>SLC5A6</i>         | rs12474906    | 2.15E-02      | 3.50E-02     | NA             | 4.59E-02        |
| <i>HFE</i>            | rs12199613    | 2.89E-02      | 3.54E-02     | NA             | 4.62E-02        |
| <i>HMGA1</i>          | rs10947436    | 2.54E-02      | 3.54E-02     | NA             | 4.62E-02        |
| <i>KRT8P26</i>        | rs1193851     | 2.26E-02      | 3.53E-02     | NA             | 4.62E-02        |
| <i>TTL1</i>           | rs134885      | 2.66E-02      | 3.59E-02     | NA             | 4.67E-02        |
| <i>PBX4</i>           | rs62135552    | 2.55E-02      | 3.61E-02     | NA             | 4.68E-02        |
| <i>HIST2H2AA4</i>     | rs72694962    | 2.46E-02      | 3.62E-02     | NA             | 4.69E-02        |
| <i>HNRNPA0</i>        | rs3756766     | 2.27E-02      | 3.65E-02     | NA             | 4.71E-02        |
| <i>TSPAN9</i>         | rs3829331     | 3.08E-02      | 3.67E-02     | NA             | 4.73E-02        |
| <i>CTA-223H9.9</i>    | rs133379      | 2.65E-02      | 3.69E-02     | NA             | 4.74E-02        |
| <i>RP4-669P10.19</i>  | rs9607850     | 2.47E-02      | 3.71E-02     | NA             | 4.76E-02        |
| <i>RP11-561C5.4</i>   | rs17598603    | 2.62E-02      | 3.72E-02     | NA             | 4.76E-02        |
| <i>WDR73</i>          | rs12905223    | 2.46E-02      | 3.72E-02     | NA             | 4.76E-02        |
| <i>PSMG3-AS1</i>      | rs4719366     | 2.84E-02      | 3.74E-02     | NA             | 4.77E-02        |
| <i>SLC35G2</i>        | rs7349597     | 2.71E-02      | 3.75E-02     | NA             | 4.78E-02        |
| <i>NKAPL</i>          | rs11752496    | 3.24E-02      | 3.79E-02     | NA             | 4.82E-02        |
| <i>CYCS</i>           | rs79210963    | 2.55E-02      | 3.84E-02     | NA             | 4.87E-02        |
| <i>RP11-245J9.5</i>   | rs13272       | 2.80E-02      | 3.91E-02     | NA             | 4.95E-02        |
| <i>RP11-47A8.5</i>    | rs3934495     | 2.87E-02      | 3.91E-02     | NA             | 4.95E-02        |
| <i>RRP7B</i>          | rs9607850     | 2.66E-02      | 3.92E-02     | NA             | 4.95E-02        |
| <i>VRK3</i>           | rs7047        | 2.98E-02      | 3.97E-02     | NA             | 5.00E-02        |

## (2) The most significant SMR analyses results in brain tissues from GTEx.

| <b>Gene</b>              | <b>topSNP</b> | <b>p_eQTL</b> | <b>p_SMR</b> | <b>p_HEIDI</b> | <b>adjp_SMR</b> |
|--------------------------|---------------|---------------|--------------|----------------|-----------------|
| <i>BTN3A2</i>            | rs3047288     | 1.47E-14      | 3.86E-10     | 0.34           | 2.26E-07        |
| <i>HLA-DMA</i>           | rs73409643    | 8.12E-18      | 7.02E-10     | NA             | 4.72E-07        |
| <i>HCG4</i>              | rs1610645     | 6.50E-22      | 5.58E-09     | 0.06           | 1.63E-06        |
| <i>C4A</i>               | rs3129950     | 2.55E-11      | 1.01E-08     | 0.05           | 3.38E-06        |
| <i>LY6G5C</i>            | rs1046089     | 5.06E-14      | 2.70E-08     | NA             | 6.05E-06        |
| <i>RP11-753C18.8</i>     | rs7911789     | 5.03E-13      | 1.25E-07     | NA             | 2.10E-05        |
| <i>CYP21A1P</i>          | rs3129950     | 5.33E-10      | 5.66E-08     | 0.07           | 2.24E-05        |
| <i>PRSS16</i>            | rs13205911    | 5.09E-09      | 8.55E-08     | 0.19           | 2.91E-05        |
| <i>AS3MT</i>             | rs35525740    | 5.87E-13      | 1.80E-07     | NA             | 4.09E-05        |
| <i>MICE</i>              | rs1737082     | 1.65E-13      | 3.38E-07     | 0.06           | 4.70E-05        |
| <i>RNF5</i>              | rs3130281     | 3.15E-09      | 3.44E-07     | 0.19           | 4.70E-05        |
| <i>HLA-C</i>             | rs6457375     | 6.70E-13      | 4.44E-07     | 0.23           | 5.86E-05        |
| <i>RP11-724N1.1</i>      | rs7911789     | 5.38E-11      | 5.49E-07     | NA             | 6.24E-05        |
| <i>HLA-F</i>             | rs1610720     | 3.16E-11      | 5.36E-07     | 0.07           | 7.21E-05        |
| <i>AC103965.1</i>        | rs12905223    | 2.06E-23      | 1.38E-07     | 0.36           | 7.94E-05        |
| <i>NAGA</i>              | rs6519298     | 4.42E-16      | 7.11E-07     | 0.07           | 7.96E-05        |
| <i>HLA-DMB</i>           | rs73409643    | 4.77E-09      | 1.05E-06     | 0.22           | 8.93E-05        |
| <i>VAR2</i>              | rs3131787     | 1.40E-08      | 9.89E-07     | 0.47           | 8.93E-05        |
| <i>BAG6</i>              | rs2736176     | 1.77E-10      | 1.31E-06     | 0.27           | 8.93E-05        |
| <i>WASF5P</i>            | rs9266231     | 3.34E-10      | 1.25E-06     | 0.05           | 8.93E-05        |
| <i>HLA-DQB2</i>          | rs1130145     | 1.43E-14      | 3.22E-07     | 0.43           | 9.28E-05        |
| <i>INO80E</i>            | rs4583255     | 7.45E-11      | 2.01E-06     | 0.21           | 1.14E-04        |
| <i>NDUFA6-AS1</i>        | rs8135801     | 3.67E-15      | 1.95E-06     | 0.12           | 1.14E-04        |
| <i>C10orf32</i>          | rs35525740    | 1.27E-09      | 2.17E-06     | NA             | 1.14E-04        |
| <i>HLA-V</i>             | rs1610720     | 3.95E-10      | 1.29E-06     | 0.26           | 1.19E-04        |
| <i>XXbac-BPG154L12.4</i> | rs6457513     | 3.60E-09      | 9.61E-07     | NA             | 1.19E-04        |
| <i>PITPNM2</i>           | rs1051434     | 1.69E-10      | 2.60E-06     | 0.13           | 1.27E-04        |
| <i>CYP21A2</i>           | rs1265754     | 2.81E-07      | 3.03E-06     | 0.46           | 1.29E-04        |
| <i>ZSCAN9</i>            | rs3131336     | 6.20E-07      | 2.85E-06     | 0.31           | 1.29E-04        |
| <i>ITIH4</i>             | rs13072536    | 1.05E-17      | 3.61E-06     | NA             | 1.38E-04        |
| <i>RP4-669P10.19</i>     | rs8135801     | 2.39E-13      | 3.65E-06     | 0.12           | 1.38E-04        |
| <i>ALMS1P</i>            | rs73947808    | 5.25E-15      | 4.34E-06     | NA             | 1.56E-04        |
| <i>ZSCAN31</i>           | rs213238      | 6.91E-13      | 6.15E-07     | 0.08           | 1.67E-04        |
| <i>CYP2D6</i>            | rs5758605     | 2.49E-14      | 8.21E-07     | 0.51           | 1.67E-04        |
| <i>DDAH2</i>             | rs1046089     | 4.36E-08      | 5.09E-06     | 0.14           | 1.74E-04        |
| <i>ZNF184</i>            | rs45527431    | 5.84E-08      | 5.87E-07     | 0.41           | 1.77E-04        |
| <i>HCG27</i>             | rs1130592     | 3.38E-09      | 5.98E-06     | 0.33           | 1.94E-04        |
| <i>TYW5</i>              | rs281771      | 5.57E-09      | 2.38E-06     | 0.98           | 2.00E-04        |
| <i>CACNA1C</i>           | rs11062170    | 4.08E-08      | 3.30E-06     | 0.53           | 2.09E-04        |
| <i>RP13-98N21.3</i>      | rs75884951    | 6.06E-18      | 3.43E-06     | 0.11           | 2.09E-04        |
| <i>HLA-F-AS1</i>         | rs416571      | 7.33E-14      | 2.05E-06     | NA             | 2.17E-04        |

| <b>Gene</b>               | <b>topSNP</b> | <b>p_eQTL</b> | <b>p_SMR</b> | <b>p_HEIDI</b> | <b>adjp_SMR</b> |
|---------------------------|---------------|---------------|--------------|----------------|-----------------|
| <i>TM6SF2</i>             | rs4808203     | 3.54E-09      | 7.70E-06     | 0.83           | 2.39E-04        |
| <i>MSH5</i>               | rs3115674     | 8.53E-08      | 1.33E-06     | 0.37           | 2.59E-04        |
| <i>RP11-806K15.1</i>      | rs7673823     | 7.64E-11      | 5.46E-06     | NA             | 2.82E-04        |
| <i>FTSJ2</i>              | rs4719431     | 8.14E-08      | 9.54E-06     | 0.30           | 2.83E-04        |
| <i>CD46</i>               | rs2745977     | 9.49E-20      | 1.04E-05     | NA             | 2.84E-04        |
| <i>BRD2</i>               | rs73409643    | 2.91E-08      | 2.61E-06     | NA             | 3.10E-04        |
| <i>RP11-102M11.2</i>      | rs696520      | 9.37E-12      | 1.98E-06     | 0.37           | 3.18E-04        |
| <i>C2orf82</i>            | rs2675956     | 8.09E-09      | 4.22E-06     | 0.30           | 3.41E-04        |
| <i>RPL23AP1</i>           | rs1610720     | 3.25E-08      | 7.48E-06     | 0.10           | 3.59E-04        |
| <i>HLA-DRB5</i>           | rs72849267    | 4.58E-11      | 6.11E-06     | 0.07           | 3.90E-04        |
| <i>RP11-890B15.3</i>      | rs62621284    | 6.92E-16      | 5.60E-06     | NA             | 3.90E-04        |
| <i>RP4-669P10.16</i>      | rs8135801     | 2.28E-20      | 1.03E-05     | 0.12           | 4.50E-04        |
| <i>PPAPDC1B</i>           | rs1488936     | 1.61E-09      | 2.03E-05     | 0.70           | 4.94E-04        |
| <i>PRR12</i>              | rs57940349    | 1.99E-11      | 2.03E-05     | NA             | 4.94E-04        |
| <i>ZKSCAN8</i>            | rs34130214    | 3.10E-06      | 2.12E-05     | 0.13           | 5.00E-04        |
| <i>ARL3</i>               | rs7911789     | 4.83E-07      | 2.42E-05     | 0.27           | 5.51E-04        |
| <i>RP5-874C20.3</i>       | rs213238      | 1.06E-09      | 4.68E-06     | 0.15           | 5.54E-04        |
| <i>HCG4P3</i>             | rs1061815     | 2.78E-08      | 2.80E-06     | 0.11           | 5.72E-04        |
| <i>HLA-K</i>              | rs1264352     | 2.07E-07      | 3.59E-06     | 0.28           | 5.72E-04        |
| <i>SF3B1</i>              | rs3792159     | 1.38E-07      | 2.64E-05     | 0.72           | 5.80E-04        |
| <i>THOC7</i>              | rs7615475     | 7.00E-09      | 2.85E-05     | 0.83           | 6.08E-04        |
| <i>DDHD2</i>              | rs9198        | 5.31E-09      | 3.03E-05     | 0.86           | 6.14E-04        |
| <i>GLYCK</i>              | rs1060330     | 7.36E-10      | 3.32E-05     | 0.16           | 6.14E-04        |
| <i>NAT8</i>               | rs11903916    | 5.13E-10      | 3.18E-05     | NA             | 6.14E-04        |
| <i>DNM1P51</i>            | rs2135551     | 1.02E-12      | 2.77E-06     | 0.48           | 6.18E-04        |
| <i>PAC3IN3</i>            | rs12272795    | 2.01E-07      | 3.56E-05     | 0.51           | 6.23E-04        |
| <i>CENPM</i>              | rs1894713     | 6.93E-11      | 4.10E-06     | 0.34           | 6.58E-04        |
| <i>CHRNA2</i>             | rs2565065     | 1.77E-08      | 3.89E-05     | NA             | 6.63E-04        |
| <i>HLA-DRB6</i>           | rs7195        | 6.38E-09      | 1.04E-05     | 0.56           | 6.71E-04        |
| <i>HCG23</i>              | rs1003878     | 1.80E-07      | 1.16E-05     | 0.06           | 6.83E-04        |
| <i>RP11-73M18.8</i>       | rs3212090     | 7.09E-07      | 4.34E-05     | 0.53           | 7.05E-04        |
| <i>HLA-DQB1</i>           | rs1130126     | 9.79E-07      | 4.50E-05     | 0.57           | 7.12E-04        |
| <i>STK19P</i>             | rs3129950     | 1.21E-05      | 4.59E-05     | 0.51           | 7.12E-04        |
| <i>ZNF192P2</i>           | rs9301        | 2.11E-08      | 1.42E-05     | 0.09           | 7.13E-04        |
| <i>C6orf48</i>            | rs2001097     | 9.64E-06      | 4.76E-05     | 0.30           | 7.21E-04        |
| <i>ZNF192P1</i>           | rs760587      | 3.23E-07      | 1.11E-05     | 0.71           | 7.76E-04        |
| <i>ZSCAN23</i>            | rs1416920     | 1.29E-06      | 1.72E-05     | 0.24           | 8.37E-04        |
| <i>C4B</i>                | rs2233974     | 1.28E-06      | 2.09E-05     | 0.08           | 8.49E-04        |
| <i>HCG17</i>              | rs1634721     | 2.64E-06      | 1.42E-05     | 0.38           | 8.49E-04        |
| <i>NOTCH4</i>             | rs204994      | 1.92E-06      | 2.17E-05     | 0.05           | 8.49E-04        |
| <i>RP11-275H4.1</i>       | rs1871355     | 1.00E-10      | 2.42E-05     | NA             | 8.49E-04        |
| <i>RP11-457M11.5</i>      | rs13217675    | 4.02E-09      | 1.99E-05     | 0.10           | 8.49E-04        |
| <i>XXbac-BPG299F13.17</i> | rs9266244     | 2.73E-07      | 1.75E-05     | 0.55           | 8.49E-04        |

| <b>Gene</b>              | <b>topSNP</b> | <b>p_eQTL</b> | <b>p_SMR</b> | <b>p_HEIDI</b> | <b>adjp_SMR</b> |
|--------------------------|---------------|---------------|--------------|----------------|-----------------|
| <i>GPSM3</i>             | rs204994      | 9.62E-06      | 6.27E-05     | 0.17           | 8.49E-04        |
| <i>PPM1M</i>             | rs7629072     | 1.68E-08      | 6.48E-05     | 0.62           | 8.49E-04        |
| <i>CSPG4P11</i>          | rs2135551     | 6.11E-08      | 4.41E-05     | 0.26           | 9.09E-04        |
| <i>SNX19</i>             | rs4936123     | 4.44E-12      | 2.25E-05     | 0.11           | 9.27E-04        |
| <i>WBP2NL</i>            | rs6519298     | 2.69E-09      | 1.62E-05     | 0.13           | 9.76E-04        |
| <i>BAK1</i>              | rs210142      | 2.13E-09      | 3.26E-05     | NA             | 9.87E-04        |
| <i>GNL3</i>              | rs11235       | 9.19E-09      | 3.54E-05     | 0.32           | 9.92E-04        |
| <i>IFITM4P</i>           | rs1633081     | 2.48E-07      | 3.28E-05     | 0.19           | 9.93E-04        |
| <i>FAM86B3P</i>          | rs2948286     | 3.51E-19      | 6.77E-05     | NA             | 1.12E-03        |
| <i>ATAT1</i>             | rs1264352     | 2.22E-06      | 1.73E-05     | 0.39           | 1.18E-03        |
| <i>FAM85B</i>            | rs2948286     | 5.83E-18      | 7.65E-05     | NA             | 1.19E-03        |
| <i>CFB</i>               | rs3132935     | 3.14E-06      | 3.00E-05     | 0.48           | 1.19E-03        |
| <i>FTCDNL1</i>           | rs796364      | 5.81E-07      | 1.84E-05     | 0.45           | 1.20E-03        |
| <i>LY6G5B</i>            | rs1046089     | 1.19E-05      | 1.10E-04     | NA             | 1.29E-03        |
| <i>RP11-282O18.3</i>     | rs585522      | 7.67E-07      | 1.10E-04     | 0.35           | 1.29E-03        |
| <i>RPS20P22</i>          | rs2411256     | 4.05E-07      | 1.07E-04     | 0.72           | 1.29E-03        |
| <i>HLA-DRB1</i>          | rs7195        | 4.01E-07      | 4.94E-05     | 0.65           | 1.37E-03        |
| <i>HLA-U</i>             | rs112863520   | 4.54E-07      | 5.32E-05     | 0.05           | 1.41E-03        |
| <i>GOLGA6L10</i>         | rs1269134     | 3.60E-07      | 1.29E-04     | 0.83           | 1.48E-03        |
| <i>IRF3</i>              | rs7047        | 1.72E-06      | 1.30E-04     | NA             | 1.48E-03        |
| <i>HLA-J</i>             | rs1061815     | 1.76E-06      | 2.78E-05     | 0.07           | 1.48E-03        |
| <i>HLA-DQB1-AS1</i>      | rs2858310     | 4.60E-08      | 4.97E-05     | NA             | 1.54E-03        |
| <i>XXbac-BPG181B23.7</i> | rs9266797     | 1.85E-08      | 5.02E-05     | NA             | 1.54E-03        |
| <i>POU5F1</i>            | rs3925616     | 1.35E-06      | 1.43E-04     | 0.56           | 1.57E-03        |
| <i>SFMBT1</i>            | rs4687680     | 2.10E-06      | 1.42E-04     | 0.33           | 1.57E-03        |
| <i>IGSF9B</i>            | rs73036062    | 7.73E-06      | 1.45E-04     | NA             | 1.57E-03        |
| <i>SMDT1</i>             | rs6002597     | 5.05E-08      | 5.66E-05     | 0.12           | 1.66E-03        |
| <i>CYP2D8P1</i>          | rs134885      | 3.88E-06      | 1.68E-04     | 0.46           | 1.71E-03        |
| <i>HCG4P7</i>            | rs416571      | 8.24E-07      | 1.21E-04     | NA             | 1.71E-03        |
| <i>C6orf100</i>          | rs3116856     | 1.32E-06      | 3.85E-05     | 0.48           | 1.72E-03        |
| <i>YPEL3</i>             | rs4788211     | 8.83E-08      | 9.04E-05     | 0.08           | 1.77E-03        |
| <i>XRCC3</i>             | rs35498576    | 1.19E-05      | 2.00E-04     | 0.83           | 2.01E-03        |
| <i>CSPG4P12</i>          | rs12905223    | 3.08E-08      | 3.61E-05     | 0.37           | 2.05E-03        |
| <i>PGBD1</i>             | rs34130214    | 3.50E-05      | 1.22E-04     | NA             | 2.16E-03        |
| <i>HLA-B</i>             | rs2523599     | 6.48E-07      | 7.44E-05     | 0.52           | 2.17E-03        |
| <i>HLA-DQA2</i>          | rs2858310     | 3.46E-06      | 2.30E-04     | NA             | 2.27E-03        |
| <i>GOLGA6L5</i>          | rs950169      | 1.73E-07      | 5.18E-05     | 0.48           | 2.34E-03        |
| <i>CPT1C</i>             | rs7047        | 7.32E-06      | 2.45E-04     | NA             | 2.39E-03        |
| <i>PCCB</i>              | rs696520      | 1.68E-06      | 1.03E-04     | 0.64           | 2.43E-03        |
| <i>RNASEH2C</i>          | rs1193851     | 3.95E-08      | 1.07E-04     | NA             | 2.44E-03        |
| <i>SMCR5</i>             | rs9907287     | 5.63E-08      | 2.58E-04     | 0.42           | 2.48E-03        |
| <i>HCG4B</i>             | rs1629068     | 9.53E-06      | 9.36E-05     | 0.38           | 2.52E-03        |
| <i>RP1-265C24.5</i>      | rs200969      | 2.96E-06      | 6.05E-05     | 0.10           | 2.52E-03        |

| <b>Gene</b>          | <b>topSNP</b> | <b>p_eQTL</b> | <b>p_SMR</b> | <b>p_HEIDI</b> | <b>adjp_SMR</b> |
|----------------------|---------------|---------------|--------------|----------------|-----------------|
| <i>BTN2A2</i>        | rs3208733     | 1.79E-07      | 1.04E-04     | NA             | 2.55E-03        |
| <i>OLA1P1</i>        | rs5758645     | 1.48E-06      | 1.07E-04     | 0.19           | 2.55E-03        |
| <i>TOM1L2</i>        | rs4584886     | 1.89E-07      | 1.97E-04     | 0.53           | 2.57E-03        |
| <i>LEMD2</i>         | rs487835      | 3.64E-06      | 2.75E-04     | 0.38           | 2.61E-03        |
| <i>TOB2P1</i>        | rs1416920     | 2.17E-05      | 1.11E-04     | 0.19           | 2.63E-03        |
| <i>TSNARE1</i>       | rs7832163     | 7.77E-07      | 1.69E-04     | NA             | 2.74E-03        |
| <i>GDPD3</i>         | rs4424923     | 8.86E-06      | 3.00E-04     | NA             | 2.76E-03        |
| <i>RP11-731C17.2</i> | rs9845788     | 9.85E-07      | 1.89E-04     | 0.45           | 2.77E-03        |
| <i>TMEM180</i>       | rs284854      | 2.80E-07      | 1.25E-04     | NA             | 2.78E-03        |
| <i>SDAD1P1</i>       | rs3808581     | 4.32E-06      | 3.12E-04     | NA             | 2.84E-03        |
| <i>ZNF391</i>        | rs35555795    | 3.58E-05      | 9.84E-05     | 0.26           | 2.88E-03        |
| <i>SERBP1P3</i>      | rs4687680     | 4.85E-06      | 2.04E-04     | 0.30           | 2.91E-03        |
| <i>FAM154B</i>       | rs75884951    | 5.49E-07      | 2.11E-04     | 0.26           | 2.95E-03        |
| <i>RCCD1</i>         | rs4702        | 1.54E-05      | 2.36E-04     | NA             | 3.18E-03        |
| <i>FLOT1</i>         | rs3129984     | 1.01E-04      | 2.45E-04     | 0.46           | 3.23E-03        |
| <i>BTBD1</i>         | rs4779046     | 7.07E-07      | 1.91E-04     | NA             | 3.26E-03        |
| <i>TCF19</i>         | rs9262696     | 1.03E-06      | 2.15E-04     | 0.21           | 3.26E-03        |
| <i>RP11-425L10.1</i> | rs6485685     | 4.03E-06      | 1.63E-04     | NA             | 3.29E-03        |
| <i>ZKSCAN3</i>       | rs9301        | 1.23E-05      | 1.44E-04     | 0.40           | 3.42E-03        |
| <i>FAM109B</i>       | rs6002597     | 3.36E-06      | 2.44E-04     | 0.30           | 3.62E-03        |
| <i>NT5C2</i>         | rs79237883    | 3.59E-05      | 2.03E-04     | 0.84           | 3.70E-03        |
| <i>RFT1</i>          | rs4687680     | 8.21E-06      | 2.58E-04     | NA             | 3.74E-03        |
| <i>AC091969.1</i>    | rs17489682    | 4.49E-06      | 2.18E-04     | 0.67           | 3.74E-03        |
| <i>CCHCR1</i>        | rs887465      | 5.75E-05      | 2.31E-04     | NA             | 3.74E-03        |
| <i>NMB</i>           | rs17598603    | 2.15E-06      | 2.07E-04     | 0.94           | 3.74E-03        |
| <i>WDR73</i>         | rs11631921    | 2.00E-07      | 1.72E-04     | 0.10           | 3.77E-03        |
| <i>NMUR2</i>         | rs2961756     | 3.79E-07      | 1.78E-04     | 0.25           | 3.79E-03        |
| <i>TSNAXIP1</i>      | rs1971546     | 1.75E-07      | 1.67E-04     | NA             | 3.83E-03        |
| <i>PSORS1C3</i>      | rs3132564     | 2.85E-05      | 3.06E-04     | NA             | 3.85E-03        |
| <i>PSORS1C1</i>      | rs1049709     | 2.86E-05      | 1.09E-04     | 0.44           | 3.89E-03        |
| <i>APOPT1</i>        | rs56168984    | 5.32E-06      | 1.22E-04     | 0.54           | 3.95E-03        |
| <i>BTN3A3</i>        | rs6940638     | 5.73E-05      | 3.18E-04     | 0.15           | 3.97E-03        |
| <i>HLA-DOA</i>       | rs1003878     | 5.65E-05      | 3.13E-04     | NA             | 3.97E-03        |
| <i>RERE</i>          | rs302719      | 3.82E-06      | 3.07E-04     | NA             | 3.97E-03        |
| <i>SRR</i>           | rs2224770     | 4.22E-07      | 1.84E-04     | NA             | 4.05E-03        |
| <i>RP5-874C20.6</i>  | rs34546986    | 2.11E-04      | 3.56E-04     | NA             | 4.27E-03        |
| <i>TDRD9</i>         | rs10132641    | 1.46E-05      | 3.00E-04     | 0.15           | 4.40E-03        |
| <i>ABHD16A</i>       | rs1046089     | 6.79E-05      | 3.35E-04     | NA             | 4.50E-03        |
| <i>PRMT7</i>         | rs1971546     | 1.57E-06      | 3.22E-04     | NA             | 4.50E-03        |
| <i>HLA-G</i>         | rs3129973     | 1.80E-04      | 3.85E-04     | 0.22           | 4.54E-03        |
| <i>U91328.19</i>     | rs198811      | 2.48E-05      | 4.21E-04     | NA             | 4.70E-03        |
| <i>ENPP7P1</i>       | rs2948286     | 2.64E-08      | 5.11E-04     | NA             | 4.80E-03        |
| <i>PLEKHO1</i>       | rs72694957    | 3.08E-05      | 5.93E-04     | NA             | 4.87E-03        |

| <b>Gene</b>          | <b>topSNP</b> | <b>p_eQTL</b> | <b>p_SMR</b> | <b>p_HEIDI</b> | <b>adjp_SMR</b> |
|----------------------|---------------|---------------|--------------|----------------|-----------------|
| <i>SKIV2L</i>        | rs9266244     | 1.36E-04      | 6.08E-04     | 0.25           | 4.94E-03        |
| <i>CDK2AP1</i>       | rs1051434     | 4.13E-05      | 4.15E-04     | NA             | 4.96E-03        |
| <i>CUL3</i>          | rs3768886     | 7.11E-06      | 4.53E-04     | NA             | 4.96E-03        |
| <i>CYP2D7P1</i>      | rs2143139     | 3.02E-05      | 4.49E-04     | NA             | 4.96E-03        |
| <i>MPHOSPH9</i>      | rs4553407     | 2.36E-05      | 4.13E-04     | 0.27           | 4.96E-03        |
| <i>SETD8</i>         | rs11057238    | 1.25E-05      | 4.01E-04     | 0.14           | 4.96E-03        |
| <i>VPS29</i>         | rs12305489    | 1.08E-05      | 4.33E-04     | NA             | 4.96E-03        |
| <i>VSIG2</i>         | rs12283429    | 1.95E-05      | 4.47E-04     | NA             | 4.96E-03        |
| <i>HAPLN4</i>        | rs8101938     | 1.57E-05      | 6.28E-04     | 0.28           | 5.04E-03        |
| <i>LINC00942</i>     | rs11062170    | 6.51E-05      | 2.79E-04     | NA             | 5.06E-03        |
| <i>MICA</i>          | rs9262617     | 8.13E-06      | 5.05E-04     | 0.23           | 5.11E-03        |
| <i>PBX4</i>          | rs880090      | 1.66E-05      | 6.52E-04     | 0.35           | 5.12E-03        |
| <i>CTSS</i>          | rs72694955    | 1.20E-05      | 5.26E-04     | NA             | 5.19E-03        |
| <i>INA</i>           | rs10430665    | 1.38E-04      | 5.06E-04     | NA             | 5.37E-03        |
| <i>TMTC1</i>         | rs302317      | 8.90E-06      | 6.15E-04     | NA             | 5.38E-03        |
| <i>HIST1H3E</i>      | rs34525648    | 6.84E-05      | 2.35E-04     | NA             | 5.47E-03        |
| <i>HCG22</i>         | rs2233974     | 2.55E-04      | 7.17E-04     | NA             | 5.51E-03        |
| <i>HLA-L</i>         | rs2523898     | 4.96E-05      | 6.04E-04     | 0.52           | 5.57E-03        |
| <i>ABCB9</i>         | rs10846491    | 2.14E-05      | 5.43E-04     | 0.47           | 5.67E-03        |
| <i>CILP2</i>         | rs8101938     | 1.57E-05      | 6.27E-04     | 0.21           | 5.70E-03        |
| <i>CTA-250D10.23</i> | rs5996096     | 2.12E-05      | 7.82E-04     | 0.16           | 5.85E-03        |
| <i>TNFRSF13C</i>     | rs1894713     | 8.92E-05      | 7.90E-04     | 0.62           | 5.85E-03        |
| <i>MYO15A</i>        | rs2955365     | 6.40E-06      | 7.36E-04     | 0.63           | 5.96E-03        |
| <i>MAPK3</i>         | rs4424923     | 1.39E-05      | 3.68E-04     | NA             | 6.03E-03        |
| <i>GUSBP2</i>        | rs2747054     | 5.16E-05      | 1.33E-04     | NA             | 6.09E-03        |
| <i>HIST1H2BF</i>     | rs6902389     | 1.55E-04      | 3.40E-04     | 0.45           | 6.13E-03        |
| <i>RP5-966M1.5</i>   | rs678         | 6.97E-06      | 6.35E-04     | 0.35           | 6.14E-03        |
| <i>ABCF1</i>         | rs886424      | 4.70E-04      | 8.69E-04     | NA             | 6.20E-03        |
| <i>BTNL2</i>         | rs3115674     | 5.03E-04      | 8.88E-04     | 0.93           | 6.20E-03        |
| <i>LINC00240</i>     | rs200969      | 2.41E-04      | 8.90E-04     | NA             | 6.20E-03        |
| <i>RP11-245J9.4</i>  | rs7615475     | 6.66E-05      | 8.67E-04     | 0.96           | 6.20E-03        |
| <i>ZC3H7B</i>        | rs9611488     | 6.74E-05      | 9.05E-04     | NA             | 6.23E-03        |
| <i>RP11-863K10.4</i> | rs7005874     | 4.23E-05      | 7.42E-04     | NA             | 6.39E-03        |
| <i>PCNXL3</i>        | rs1193851     | 3.25E-05      | 9.42E-04     | NA             | 6.42E-03        |
| <i>HCG24</i>         | rs210142      | 7.71E-06      | 4.07E-04     | NA             | 6.44E-03        |
| <i>ZNRD1-AS1</i>     | rs1061815     | 3.78E-04      | 9.95E-04     | NA             | 6.56E-03        |
| <i>ZNRD1</i>         | rs1061815     | 3.82E-04      | 1.00E-03     | NA             | 6.56E-03        |
| <i>GLRA1</i>         | rs72801007    | 2.95E-05      | 6.94E-04     | 0.45           | 6.57E-03        |
| <i>EFTUD1P1</i>      | rs2135551     | 6.05E-06      | 2.53E-04     | NA             | 6.57E-03        |
| <i>TAP1</i>          | rs3134940     | 3.59E-04      | 8.07E-04     | NA             | 6.59E-03        |
| <i>LRRC48</i>        | rs4584886     | 6.89E-06      | 5.93E-04     | 0.59           | 6.62E-03        |
| <i>RP11-73M18.9</i>  | rs11623546    | 1.13E-05      | 1.60E-04     | NA             | 6.66E-03        |
| <i>MICB</i>          | rs1051788     | 8.86E-06      | 4.79E-04     | NA             | 6.73E-03        |



| <b>Gene</b>              | <b>topSNP</b> | <b>p_eQTL</b> | <b>p_SMR</b> | <b>p_HEIDI</b> | <b>adjp_SMR</b> |
|--------------------------|---------------|---------------|--------------|----------------|-----------------|
| <i>HLA-W</i>             | rs1736934     | 1.32E-04      | 1.09E-03     | 0.09           | 6.98E-03        |
| <i>ATF6B</i>             | rs2736176     | 2.00E-05      | 2.17E-04     | 0.41           | 7.04E-03        |
| <i>HIST1H1C</i>          | rs9348746     | 2.31E-04      | 1.12E-03     | NA             | 7.08E-03        |
| <i>EP300</i>             | rs9611469     | 1.11E-04      | 1.16E-03     | NA             | 7.23E-03        |
| <i>AGPAT1</i>            | rs204994      | 1.49E-04      | 4.38E-04     | 0.17           | 7.24E-03        |
| <i>HLA-DQA1</i>          | rs2858310     | 4.61E-05      | 7.25E-04     | NA             | 7.33E-03        |
| <i>C2</i>                | rs130065      | 1.06E-04      | 3.31E-04     | NA             | 7.47E-03        |
| <i>HLA-H</i>             | rs2535332     | 1.36E-04      | 3.07E-04     | NA             | 7.47E-03        |
| <i>BTN1A1</i>            | rs28551159    | 6.97E-04      | 1.22E-03     | 0.94           | 7.50E-03        |
| <i>AGER</i>              | rs73409643    | 9.53E-05      | 3.57E-04     | NA             | 7.52E-03        |
| <i>BTN3A1</i>            | rs3208733     | 4.01E-05      | 8.03E-04     | NA             | 7.54E-03        |
| <i>C6orf136</i>          | rs2523898     | 8.54E-05      | 8.05E-04     | NA             | 7.54E-03        |
| <i>NDUF2</i>             | rs4583848     | 7.87E-05      | 4.87E-04     | 0.86           | 7.62E-03        |
| <i>ZBTB42</i>            | rs2223937     | 5.52E-05      | 5.00E-04     | NA             | 7.67E-03        |
| <i>GPANK1</i>            | rs1046089     | 3.29E-04      | 9.93E-04     | NA             | 7.71E-03        |
| <i>PSMG3-AS1</i>         | rs3778970     | 6.90E-05      | 5.22E-04     | 0.23           | 7.81E-03        |
| <i>RP11-182J1.14</i>     | rs2135551     | 3.29E-05      | 5.53E-04     | NA             | 7.93E-03        |
| <i>HSPA1L</i>            | rs1264318     | 3.93E-04      | 9.72E-04     | NA             | 7.97E-03        |
| <i>ACO2</i>              | rs9611488     | 1.44E-04      | 1.33E-03     | NA             | 8.02E-03        |
| <i>MDK</i>               | rs12574918    | 7.11E-05      | 9.43E-04     | NA             | 8.12E-03        |
| <i>LPAR2</i>             | rs8101938     | 5.03E-05      | 1.03E-03     | NA             | 8.20E-03        |
| <i>COL11A2</i>           | rs73409626    | 4.51E-04      | 1.11E-03     | NA             | 8.28E-03        |
| <i>CDIPT-AS1</i>         | rs4583255     | 8.56E-05      | 6.26E-04     | NA             | 8.47E-03        |
| <i>POC1A</i>             | rs111177      | 2.95E-06      | 6.43E-04     | NA             | 8.54E-03        |
| <i>RP11-490G2.2</i>      | rs1702294     | 2.53E-04      | 7.36E-04     | 0.57           | 8.57E-03        |
| <i>ZNF204P</i>           | rs6940638     | 2.16E-04      | 7.72E-04     | NA             | 8.68E-03        |
| <i>XXbac-BPG252P9.10</i> | rs3095153     | 3.95E-04      | 7.14E-04     | NA             | 8.69E-03        |
| <i>SLC44A4</i>           | rs2233974     | 4.54E-04      | 1.10E-03     | NA             | 8.73E-03        |
| <i>RP1-86C11.7</i>       | rs6940638     | 1.12E-04      | 4.92E-04     | NA             | 8.75E-03        |
| <i>CPEB1</i>             | rs1145173     | 9.34E-05      | 1.12E-03     | NA             | 8.76E-03        |
| <i>DDX39B</i>            | rs74618856    | 2.99E-04      | 1.20E-03     | NA             | 8.97E-03        |
| <i>LINC00634</i>         | rs9611488     | 9.73E-05      | 1.09E-03     | NA             | 9.01E-03        |
| <i>RP5-1157M23.2</i>     | rs7622851     | 6.38E-05      | 1.12E-03     | NA             | 9.01E-03        |
| <i>HIST1H4I</i>          | rs35345226    | 5.01E-04      | 7.58E-04     | 0.53           | 9.29E-03        |
| <i>SLCO4C1</i>           | rs3114661     | 4.17E-06      | 1.22E-03     | NA             | 9.38E-03        |
| <i>HCG20</i>             | rs2523898     | 2.14E-04      | 1.34E-03     | NA             | 9.41E-03        |
| <i>DPYD</i>              | rs7415086     | 2.09E-04      | 8.43E-04     | NA             | 9.47E-03        |
| <i>C6orf25</i>           | rs2736176     | 4.21E-04      | 1.45E-03     | NA             | 9.62E-03        |
| <i>CD2BP2</i>            | rs4424923     | 2.07E-04      | 1.44E-03     | NA             | 9.62E-03        |
| <i>USP8P1</i>            | rs1960278     | 6.27E-04      | 1.70E-03     | NA             | 9.68E-03        |
| <i>LINC00606</i>         | rs61432137    | 2.57E-05      | 8.58E-04     | NA             | 9.68E-03        |
| <i>RPP21</i>             | rs1629068     | 1.65E-04      | 6.01E-04     | 0.23           | 9.71E-03        |
| <i>CTCF</i>              | rs1971546     | 3.90E-05      | 1.04E-03     | NA             | 9.84E-03        |

| Gene               | topSNP     | p_eQTL   | p_SMR    | p_HEIDI | adjp_SMR |
|--------------------|------------|----------|----------|---------|----------|
| SAPCD1-AS1         | rs3094605  | 1.16E-03 | 1.75E-03 | NA      | 9.88E-03 |
| MED19              | rs708228   | 2.67E-04 | 1.80E-03 | NA      | 9.90E-03 |
| PTK2B              | rs2565065  | 2.62E-04 | 1.80E-03 | NA      | 9.90E-03 |
| SREBF2             | rs9611488  | 2.60E-04 | 1.82E-03 | NA      | 9.90E-03 |
| HLA-T              | rs1063320  | 1.61E-04 | 1.84E-03 | 0.28    | 9.94E-03 |
| HLA-DPB1           | rs1003878  | 5.21E-04 | 1.43E-03 | NA      | 1.01E-02 |
| C6orf47            | rs1046089  | 3.97E-04 | 1.14E-03 | NA      | 1.02E-02 |
| CNNM2              | rs77420391 | 5.88E-04 | 1.46E-03 | NA      | 1.02E-02 |
| RP11-347C12.2      | rs4424923  | 8.53E-05 | 8.95E-04 | NA      | 1.03E-02 |
| NRM                | rs1737082  | 5.61E-04 | 1.94E-03 | NA      | 1.04E-02 |
| VPS45              | rs1824850  | 6.22E-05 | 8.43E-04 | NA      | 1.04E-02 |
| PPT2               | rs3132451  | 9.18E-04 | 1.63E-03 | NA      | 1.06E-02 |
| RP11-631M6.2       | rs4583848  | 6.77E-04 | 1.99E-03 | NA      | 1.06E-02 |
| OVOL1              | rs1193851  | 1.82E-04 | 2.02E-03 | NA      | 1.07E-02 |
| ZSCAN12P1          | rs2275508  | 7.03E-04 | 2.03E-03 | NA      | 1.07E-02 |
| STAT2              | rs324015   | 1.22E-04 | 9.79E-04 | NA      | 1.08E-02 |
| PPP1R18            | rs9266231  | 5.07E-04 | 1.56E-03 | 0.97    | 1.09E-02 |
| PAIP1P1            | rs9262696  | 3.02E-05 | 7.80E-04 | NA      | 1.09E-02 |
| HCG21              | rs2596473  | 2.85E-05 | 6.16E-04 | NA      | 1.09E-02 |
| MKLN1-AS1          | rs10954343 | 2.17E-04 | 2.15E-03 | NA      | 1.10E-02 |
| PACSIN1            | rs942496   | 3.08E-04 | 2.14E-03 | NA      | 1.10E-02 |
| XXbac-BPG157A10.21 | rs5021453  | 8.54E-04 | 2.14E-03 | NA      | 1.10E-02 |
| LY6G6C             | rs130079   | 7.49E-04 | 1.60E-03 | NA      | 1.11E-02 |
| DGKZ               | rs12576115 | 6.62E-04 | 2.21E-03 | NA      | 1.12E-02 |
| DBF4               | rs76349903 | 3.04E-04 | 2.24E-03 | NA      | 1.12E-02 |
| RP11-524F11.1      | rs9890563  | 8.72E-05 | 2.23E-03 | NA      | 1.12E-02 |
| RPRD2              | rs72694965 | 4.05E-04 | 2.26E-03 | NA      | 1.12E-02 |
| LY6E               | rs7832163  | 1.99E-04 | 1.74E-03 | NA      | 1.12E-02 |
| C11orf49           | rs12574918 | 4.75E-05 | 7.77E-04 | 0.06    | 1.13E-02 |
| LINC00933          | rs12905223 | 1.59E-04 | 1.80E-03 | 0.85    | 1.14E-02 |
| CDIPT              | rs4583255  | 4.39E-04 | 1.71E-03 | NA      | 1.14E-02 |
| AL049840.1         | rs2368560  | 9.58E-05 | 6.71E-04 | 0.87    | 1.15E-02 |
| AIF1               | rs1264352  | 1.14E-03 | 1.92E-03 | NA      | 1.15E-02 |
| ZFYVE21            | rs2368560  | 5.26E-04 | 1.92E-03 | NA      | 1.15E-02 |
| KIF26A             | rs56168984 | 5.15E-04 | 1.78E-03 | NA      | 1.16E-02 |
| RP13-467H17.1      | rs7462788  | 2.76E-04 | 1.11E-03 | NA      | 1.16E-02 |
| HLA-DPA1           | rs5021453  | 9.89E-04 | 2.38E-03 | NA      | 1.17E-02 |
| DNAJB7             | rs9607850  | 7.45E-05 | 1.21E-03 | NA      | 1.18E-02 |
| RP11-1814.10       | rs284856   | 1.50E-04 | 2.07E-03 | NA      | 1.18E-02 |
| RP11-455F5.3       | rs4583255  | 5.79E-04 | 2.04E-03 | NA      | 1.18E-02 |
| BTN2A1             | rs3208733  | 2.82E-04 | 2.09E-03 | NA      | 1.18E-02 |
| ARTN               | rs3001723  | 4.17E-04 | 1.78E-03 | NA      | 1.18E-02 |
| CTD-3051D23.4      | rs10132641 | 5.03E-04 | 2.12E-03 | NA      | 1.18E-02 |

| <b>Gene</b>          | <b>topSNP</b> | <b>p_eQTL</b> | <b>p_SMR</b> | <b>p_HEIDI</b> | <b>adjp_SMR</b> |
|----------------------|---------------|---------------|--------------|----------------|-----------------|
| <i>PRRT1</i>         | rs1049709     | 1.27E-03      | 2.13E-03     | NA             | 1.18E-02        |
| <i>VWA7</i>          | rs1041885     | 1.30E-03      | 2.17E-03     | NA             | 1.20E-02        |
| <i>ALMS1</i>         | rs73947808    | 1.21E-04      | 1.45E-03     | NA             | 1.20E-02        |
| <i>DUS2</i>          | rs1971546     | 2.07E-04      | 2.19E-03     | NA             | 1.20E-02        |
| <i>RP11-182J1.5</i>  | rs12905223    | 1.79E-04      | 1.34E-03     | NA             | 1.20E-02        |
| <i>FKBPL</i>         | rs204994      | 7.31E-04      | 1.48E-03     | NA             | 1.20E-02        |
| <i>BRF2</i>          | rs7005874     | 1.16E-04      | 1.22E-03     | NA             | 1.21E-02        |
| <i>CKB</i>           | rs34633710    | 9.78E-05      | 1.19E-03     | 0.23           | 1.21E-02        |
| <i>CTD-3065B20.1</i> | rs4702        | 2.43E-04      | 1.16E-03     | NA             | 1.21E-02        |
| <i>HIST1H2BK</i>     | rs6940638     | 3.87E-04      | 1.16E-03     | NA             | 1.21E-02        |
| <i>SKI</i>           | rs2477686     | 1.52E-04      | 1.19E-03     | NA             | 1.21E-02        |
| <i>TBX6</i>          | rs4788211     | 8.82E-05      | 1.20E-03     | NA             | 1.21E-02        |
| <i>RP1-97D16.1</i>   | rs760587      | 8.73E-04      | 1.90E-03     | NA             | 1.22E-02        |
| <i>3-Sep</i>         | rs5996096     | 1.55E-04      | 1.85E-03     | 0.15           | 1.22E-02        |
| <i>GATAD2A</i>       | rs4808203     | 3.11E-04      | 1.42E-03     | NA             | 1.22E-02        |
| <i>SPATS2L</i>       | rs59695400    | 2.05E-04      | 1.45E-03     | 0.10           | 1.22E-02        |
| <i>RP11-600F24.7</i> | rs4906379     | 2.16E-04      | 1.06E-03     | 0.64           | 1.23E-02        |
| <i>ATP13A1</i>       | rs880090      | 3.35E-04      | 2.55E-03     | NA             | 1.23E-02        |
| <i>RP13-98N21.2</i>  | rs75884951    | 1.11E-04      | 1.55E-03     | NA             | 1.23E-02        |
| <i>HSPA1B</i>        | rs1264318     | 4.63E-04      | 1.10E-03     | NA             | 1.25E-02        |
| <i>GLT8D1</i>        | rs111177      | 1.82E-05      | 1.14E-03     | NA             | 1.26E-02        |
| <i>MDC1</i>          | rs1633081     | 8.72E-04      | 2.65E-03     | NA             | 1.26E-02        |
| <i>TRIM26</i>        | rs3094125     | 1.29E-03      | 2.02E-03     | NA             | 1.27E-02        |
| <i>GPM6A</i>         | rs7673823     | 6.62E-04      | 2.69E-03     | NA             | 1.27E-02        |
| <i>SDCCAG8</i>       | rs10803138    | 3.28E-04      | 2.06E-03     | NA             | 1.28E-02        |
| <i>HCG18</i>         | rs1049709     | 6.21E-04      | 1.18E-03     | NA             | 1.28E-02        |
| <i>DEPDC1B</i>       | rs4583848     | 7.86E-04      | 2.21E-03     | NA             | 1.28E-02        |
| <i>HCG11</i>         | rs2235251     | 1.45E-03      | 2.21E-03     | NA             | 1.28E-02        |
| <i>HLA-DPA3</i>      | rs210142      | 3.02E-04      | 2.20E-03     | NA             | 1.28E-02        |
| <i>GNL1</i>          | rs1264352     | 7.53E-04      | 1.37E-03     | NA             | 1.29E-02        |
| <i>RFTN2</i>         | rs12693816    | 2.08E-04      | 1.37E-03     | NA             | 1.29E-02        |
| <i>TMEM110</i>       | rs13072536    | 8.07E-05      | 1.35E-03     | NA             | 1.29E-02        |
| <i>RAI1</i>          | rs4584886     | 1.85E-04      | 2.22E-03     | NA             | 1.31E-02        |
| <i>PLCL1</i>         | rs4850812     | 5.56E-04      | 2.85E-03     | 0.81           | 1.32E-02        |
| <i>RP11-345P4.6</i>  | rs10797426    | 7.21E-04      | 2.81E-03     | NA             | 1.32E-02        |
| <i>VPS52</i>         | rs1048645     | 9.98E-04      | 2.87E-03     | NA             | 1.32E-02        |
| <i>DCTPP1</i>        | rs4424923     | 4.26E-04      | 2.17E-03     | NA             | 1.32E-02        |
| <i>PAIP2</i>         | rs256013      | 2.54E-04      | 2.20E-03     | NA             | 1.32E-02        |
| <i>GPER1</i>         | rs3800882     | 7.41E-04      | 2.47E-03     | 0.25           | 1.33E-02        |
| <i>RPL3P2</i>        | rs3134900     | 8.69E-04      | 1.46E-03     | NA             | 1.33E-02        |
| <i>EIF5</i>          | rs3212090     | 3.31E-04      | 1.30E-03     | 0.83           | 1.33E-02        |
| <i>USMG5</i>         | rs10883798    | 4.42E-04      | 1.25E-03     | NA             | 1.33E-02        |
| <i>PPP1R11</i>       | rs112863520   | 9.50E-04      | 2.99E-03     | NA             | 1.34E-02        |

| <b>Gene</b>               | <b>topSNP</b> | <b>p_eQTL</b> | <b>p_SMR</b> | <b>p_HEIDI</b> | <b>adjp_SMR</b> |
|---------------------------|---------------|---------------|--------------|----------------|-----------------|
| <i>SEMA6C</i>             | rs72694955    | 5.00E-04      | 3.00E-03     | NA             | 1.34E-02        |
| <i>GTF2H4</i>             | rs74618856    | 9.08E-04      | 2.54E-03     | NA             | 1.34E-02        |
| <i>HSD17B8</i>            | rs210142      | 4.14E-04      | 2.60E-03     | NA             | 1.34E-02        |
| <i>ALKBH5</i>             | rs9907287     | 2.15E-04      | 3.06E-03     | NA             | 1.35E-02        |
| <i>XXbac-BPG299F13.14</i> | rs1131165     | 7.55E-04      | 2.33E-03     | 0.99           | 1.35E-02        |
| <i>ACTR5</i>              | rs4812317     | 1.36E-03      | 3.14E-03     | NA             | 1.36E-02        |
| <i>ALPK3</i>              | rs17598603    | 6.91E-04      | 3.18E-03     | 0.64           | 1.36E-02        |
| <i>ATP6V1G2</i>           | rs9264640     | 1.14E-03      | 3.18E-03     | NA             | 1.36E-02        |
| <i>RP11-77H9.6</i>        | rs8058276     | 5.77E-05      | 1.44E-03     | 0.26           | 1.36E-02        |
| <i>OGFOD2</i>             | rs4275659     | 7.49E-04      | 2.66E-03     | NA             | 1.36E-02        |
| <i>RP11-182J1.16</i>      | rs2135551     | 3.62E-04      | 2.70E-03     | 0.83           | 1.36E-02        |
| <i>RP1-257I20.14</i>      | rs8135801     | 7.21E-04      | 3.25E-03     | NA             | 1.38E-02        |
| <i>TRIM27</i>             | rs1610721     | 1.11E-03      | 2.76E-03     | NA             | 1.38E-02        |
| <i>RP11-182J1.1</i>       | rs1051168     | 2.63E-04      | 1.84E-03     | 0.90           | 1.40E-02        |
| <i>REEP2</i>              | rs55985421    | 8.44E-04      | 3.35E-03     | NA             | 1.40E-02        |
| <i>C7orf50</i>            | rs6950330     | 9.37E-04      | 2.59E-03     | NA             | 1.41E-02        |
| <i>HSPA1A</i>             | rs2075800     | 9.60E-04      | 2.61E-03     | NA             | 1.41E-02        |
| <i>TCF4</i>               | rs784255      | 2.17E-04      | 1.16E-03     | NA             | 1.41E-02        |
| <i>HIST2H2BF</i>          | rs7555080     | 6.77E-04      | 3.43E-03     | NA             | 1.41E-02        |
| <i>LPXN</i>               | rs708228      | 1.85E-04      | 1.48E-03     | NA             | 1.41E-02        |
| <i>SCAND3</i>             | rs7750526     | 7.60E-04      | 1.53E-03     | 0.68           | 1.41E-02        |
| <i>KRT8P26</i>            | rs1193851     | 5.55E-04      | 3.52E-03     | NA             | 1.42E-02        |
| <i>TULP3</i>              | rs10774033    | 1.65E-03      | 3.50E-03     | NA             | 1.42E-02        |
| <i>RP1-85F18.5</i>        | rs9611469     | 7.78E-05      | 9.65E-04     | NA             | 1.42E-02        |
| <i>ZSCAN16</i>            | rs1150670     | 3.36E-04      | 1.23E-03     | 0.45           | 1.43E-02        |
| <i>CACNA1I</i>            | rs1008677     | 4.01E-04      | 1.62E-03     | NA             | 1.44E-02        |
| <i>MARK3</i>              | rs12891288    | 1.42E-05      | 6.88E-04     | 0.07           | 1.44E-02        |
| <i>HYI</i>                | rs3001723     | 1.71E-04      | 1.03E-03     | NA             | 1.44E-02        |
| <i>PHF5A</i>              | rs6519298     | 6.22E-04      | 2.68E-03     | NA             | 1.45E-02        |
| <i>ASPHD1</i>             | rs4424923     | 2.60E-04      | 1.64E-03     | NA             | 1.45E-02        |
| <i>NEK4</i>               | rs11717383    | 7.09E-04      | 3.64E-03     | NA             | 1.45E-02        |
| <i>MAD1L1</i>             | rs13227554    | 1.56E-03      | 2.97E-03     | NA             | 1.45E-02        |
| <i>OTUD7B</i>             | rs72694965    | 6.39E-04      | 2.94E-03     | NA             | 1.45E-02        |
| <i>GOLGA6L9</i>           | rs75884951    | 1.44E-04      | 1.75E-03     | NA             | 1.47E-02        |
| <i>CSDC2</i>              | rs5758268     | 2.36E-04      | 1.98E-03     | NA             | 1.50E-02        |
| <i>CTD-2589M5.5</i>       | rs61884292    | 4.04E-04      | 1.83E-03     | NA             | 1.50E-02        |
| <i>GPIHBP1</i>            | rs7462788     | 6.60E-04      | 2.00E-03     | NA             | 1.50E-02        |
| <i>TNXA</i>               | rs1142323     | 6.83E-04      | 1.91E-03     | NA             | 1.50E-02        |
| <i>CISD2</i>              | rs13107325    | 1.37E-03      | 2.83E-03     | NA             | 1.50E-02        |
| <i>LINC00336</i>          | rs210142      | 4.81E-04      | 2.82E-03     | NA             | 1.50E-02        |
| <i>MADD</i>               | rs10838634    | 1.11E-03      | 3.82E-03     | NA             | 1.51E-02        |
| <i>MSL2</i>               | rs7349597     | 1.73E-04      | 1.35E-03     | NA             | 1.51E-02        |
| <i>FSD2</i>               | rs75884951    | 8.57E-05      | 1.38E-03     | NA             | 1.52E-02        |

| <b>Gene</b>          | <b>topSNP</b> | <b>p_eQTL</b> | <b>p_SMR</b> | <b>p_HEIDI</b> | <b>adjp_SMR</b> |
|----------------------|---------------|---------------|--------------|----------------|-----------------|
| <i>FANCL</i>         | rs2678915     | 8.91E-04      | 3.89E-03     | NA             | 1.52E-02        |
| <i>RGL2</i>          | rs3129950     | 2.05E-03      | 2.95E-03     | NA             | 1.53E-02        |
| <i>WDR46</i>         | rs5021453     | 1.36E-03      | 3.02E-03     | NA             | 1.53E-02        |
| <i>NOL5BP</i>        | rs9468350     | 1.19E-03      | 2.00E-03     | NA             | 1.54E-02        |
| <i>SPDEF</i>         | rs2395401     | 3.86E-04      | 1.99E-03     | NA             | 1.54E-02        |
| <i>SLC35G2</i>       | rs7349597     | 3.90E-04      | 2.12E-03     | NA             | 1.55E-02        |
| <i>MRPS18B</i>       | rs1610721     | 1.39E-03      | 3.26E-03     | NA             | 1.56E-02        |
| <i>EHMT2</i>         | rs2001097     | 1.09E-03      | 1.84E-03     | NA             | 1.56E-02        |
| <i>hsa-mir-8072</i>  | rs7304782     | 1.38E-03      | 3.15E-03     | NA             | 1.57E-02        |
| <i>BAP1</i>          | rs6769789     | 9.51E-04      | 3.43E-03     | NA             | 1.58E-02        |
| <i>VPS51</i>         | rs1193851     | 5.25E-04      | 3.42E-03     | NA             | 1.58E-02        |
| <i>FIBP</i>          | rs1193851     | 4.67E-04      | 3.22E-03     | NA             | 1.59E-02        |
| <i>IER3</i>          | rs3129984     | 1.17E-03      | 1.84E-03     | NA             | 1.59E-02        |
| <i>PPP1R13B</i>      | rs2368560     | 5.45E-04      | 1.97E-03     | NA             | 1.59E-02        |
| <i>SULT1A4</i>       | rs4424923     | 3.57E-04      | 1.96E-03     | NA             | 1.59E-02        |
| <i>AC110781.3</i>    | rs872465      | 4.64E-04      | 2.48E-03     | NA             | 1.60E-02        |
| <i>SLK</i>           | rs79237883    | 1.21E-03      | 2.50E-03     | NA             | 1.60E-02        |
| <i>RP5-1104E15.6</i> | rs9306336     | 1.77E-04      | 1.99E-03     | NA             | 1.60E-02        |
| <i>FAM65B</i>        | rs34525648    | 1.49E-03      | 2.56E-03     | NA             | 1.61E-02        |
| <i>FXR1</i>          | rs1805589     | 7.87E-04      | 2.58E-03     | NA             | 1.61E-02        |
| <i>SAP30L-AS1</i>    | rs11740474    | 4.67E-04      | 3.01E-03     | NA             | 1.61E-02        |
| <i>PHF7</i>          | rs13072536    | 2.07E-04      | 2.09E-03     | NA             | 1.61E-02        |
| <i>RP11-661D19.3</i> | rs34633710    | 3.04E-04      | 2.12E-03     | NA             | 1.61E-02        |
| <i>SLC25A5P1</i>     | rs133347      | 1.23E-03      | 4.15E-03     | NA             | 1.62E-02        |
| <i>MIR137HG</i>      | rs4506495     | 1.63E-03      | 3.59E-03     | NA             | 1.62E-02        |
| <i>VRK3</i>          | rs7047        | 3.99E-04      | 1.97E-03     | NA             | 1.62E-02        |
| <i>AC156455.1</i>    | rs883563      | 1.03E-03      | 4.19E-03     | NA             | 1.62E-02        |
| <i>UBE2Q2P1</i>      | rs3803405     | 4.99E-04      | 4.25E-03     | 0.41           | 1.63E-02        |
| <i>PDCD11</i>        | rs284854      | 5.72E-04      | 3.10E-03     | NA             | 1.63E-02        |
| <i>DNAJC19</i>       | rs16832165    | 6.36E-04      | 2.31E-03     | NA             | 1.64E-02        |
| <i>C1QTNF4</i>       | rs10838634    | 5.05E-04      | 2.35E-03     | NA             | 1.65E-02        |
| <i>RP11-894P9.1</i>  | rs11623546    | 2.07E-03      | 4.47E-03     | NA             | 1.65E-02        |
| <i>SEMA3G</i>        | rs1029871     | 6.32E-04      | 4.45E-03     | NA             | 1.65E-02        |
| <i>VARS</i>          | rs2596473     | 5.25E-04      | 2.73E-03     | NA             | 1.65E-02        |
| <i>RN7SL471P</i>     | rs3131336     | 2.71E-03      | 3.40E-03     | NA             | 1.67E-02        |
| <i>CSNK2B</i>        | rs2075800     | 1.10E-03      | 2.88E-03     | NA             | 1.67E-02        |
| <i>CTD-2126E3.3</i>  | rs7047        | 7.64E-04      | 2.92E-03     | NA             | 1.67E-02        |
| <i>HIST1H2AC</i>     | rs3208733     | 5.17E-04      | 2.89E-03     | NA             | 1.67E-02        |
| <i>ATXN7L1</i>       | rs7807853     | 7.07E-04      | 3.32E-03     | NA             | 1.68E-02        |
| <i>DTX3</i>          | rs73115999    | 1.87E-04      | 2.27E-03     | NA             | 1.69E-02        |
| <i>ZNF101</i>        | rs880090      | 7.22E-04      | 3.83E-03     | NA             | 1.69E-02        |
| <i>AC093590.1</i>    | rs281771      | 8.75E-04      | 2.11E-03     | NA             | 1.70E-02        |
| <i>APOM</i>          | rs1049709     | 1.28E-03      | 2.14E-03     | NA             | 1.70E-02        |

| <b>Gene</b>         | <b>topSNP</b> | <b>p_eQTL</b> | <b>p_SMR</b> | <b>p_HEIDI</b> | <b>adjp_SMR</b> |
|---------------------|---------------|---------------|--------------|----------------|-----------------|
| <i>ARFGAP3</i>      | rs5758659     | 5.90E-04      | 2.03E-03     | NA             | 1.70E-02        |
| <i>C8orf86</i>      | rs2016875     | 2.51E-04      | 1.87E-03     | NA             | 1.70E-02        |
| <i>GRAP2</i>        | rs9306336     | 2.37E-04      | 2.29E-03     | NA             | 1.70E-02        |
| <i>HIST1H4C</i>     | rs198811      | 4.56E-04      | 2.08E-03     | NA             | 1.70E-02        |
| <i>LTA</i>          | rs2001097     | 1.34E-03      | 2.20E-03     | NA             | 1.70E-02        |
| <i>RP11-73M18.6</i> | rs10132641    | 5.71E-04      | 2.30E-03     | NA             | 1.70E-02        |
| <i>ZKSCAN4</i>      | rs34130214    | 1.34E-03      | 2.19E-03     | NA             | 1.70E-02        |
| <i>GABBR1</i>       | rs1611204     | 1.81E-03      | 3.88E-03     | NA             | 1.70E-02        |
| <i>HLA-DOB</i>      | rs1003878     | 1.67E-03      | 3.40E-03     | NA             | 1.70E-02        |
| <i>POLR3H</i>       | rs9611488     | 1.34E-03      | 4.68E-03     | NA             | 1.70E-02        |
| <i>STK19</i>        | rs3132935     | 3.02E-03      | 4.69E-03     | NA             | 1.70E-02        |
| <i>XRCC6</i>        | rs9611488     | 1.35E-03      | 4.70E-03     | NA             | 1.70E-02        |
| <i>ALG1L13P</i>     | rs2948286     | 4.62E-05      | 2.66E-03     | NA             | 1.72E-02        |
| <i>DDX39B-AS1</i>   | rs1265092     | 3.03E-04      | 2.45E-03     | NA             | 1.72E-02        |
| <i>GPR146</i>       | rs56727870    | 1.18E-03      | 2.51E-03     | NA             | 1.72E-02        |
| <i>KNTC1</i>        | rs1051434     | 7.12E-04      | 2.35E-03     | NA             | 1.72E-02        |
| <i>LEPRE1</i>       | rs3001723     | 7.16E-04      | 2.50E-03     | NA             | 1.72E-02        |
| <i>NCR3</i>         | rs3094605     | 1.73E-03      | 2.48E-03     | NA             | 1.72E-02        |
| <i>BTN2A3P</i>      | rs6910549     | 1.89E-03      | 3.19E-03     | NA             | 1.72E-02        |
| <i>HFE</i>          | rs34525648    | 1.88E-03      | 3.10E-03     | NA             | 1.72E-02        |
| <i>RP11-73M18.7</i> | rs3212024     | 3.98E-04      | 1.45E-03     | NA             | 1.74E-02        |
| <i>PNOC</i>         | rs111659883   | 9.86E-04      | 3.61E-03     | NA             | 1.74E-02        |
| <i>ROBO3</i>        | rs12283429    | 9.99E-04      | 3.70E-03     | NA             | 1.76E-02        |
| <i>SCGN</i>         | rs9393716     | 2.48E-03      | 4.95E-03     | NA             | 1.76E-02        |
| <i>PPP1R16B</i>     | rs12625702    | 7.99E-04      | 3.57E-03     | NA             | 1.78E-02        |
| <i>RNF39</i>        | rs112863520   | 1.34E-03      | 3.77E-03     | NA             | 1.78E-02        |
| <i>CYP17A1</i>      | rs17114641    | 6.72E-04      | 2.79E-03     | NA             | 1.79E-02        |
| <i>F2</i>           | rs6485685     | 7.93E-04      | 2.82E-03     | NA             | 1.79E-02        |
| <i>CTB-152G17.6</i> | rs3801281     | 6.78E-04      | 2.77E-03     | NA             | 1.79E-02        |
| <i>PSORS1C2</i>     | rs3132564     | 8.35E-04      | 2.48E-03     | NA             | 1.79E-02        |
| <i>NRIP2</i>        | rs10774033    | 1.23E-03      | 2.81E-03     | NA             | 1.80E-02        |
| <i>CEP170</i>       | rs14403       | 7.30E-04      | 2.83E-03     | NA             | 1.81E-02        |
| <i>MEI1</i>         | rs9611469     | 5.70E-04      | 2.80E-03     | NA             | 1.81E-02        |
| <i>NAPSB</i>        | rs7047        | 1.87E-03      | 5.18E-03     | NA             | 1.81E-02        |
| <i>NDUFA6</i>       | rs5758268     | 1.39E-03      | 5.27E-03     | NA             | 1.82E-02        |
| <i>RP1-313I6.12</i> | rs9295759     | 2.62E-03      | 5.24E-03     | NA             | 1.82E-02        |
| <i>EIF4BP6</i>      | rs7807853     | 5.72E-04      | 2.94E-03     | NA             | 1.82E-02        |
| <i>CNTN4</i>        | rs9845120     | 5.36E-04      | 3.04E-03     | NA             | 1.83E-02        |
| <i>LRTM2</i>        | rs11062157    | 5.50E-04      | 3.04E-03     | NA             | 1.83E-02        |
| <i>C1orf86</i>      | rs10797426    | 8.55E-04      | 3.13E-03     | NA             | 1.84E-02        |
| <i>UQCC2</i>        | rs2395401     | 7.76E-04      | 3.03E-03     | 0.92           | 1.84E-02        |
| <i>DHFRP2</i>       | rs1131165     | 1.54E-03      | 3.81E-03     | NA             | 1.85E-02        |
| <i>ZBTB22</i>       | rs1048645     | 1.51E-03      | 3.81E-03     | NA             | 1.85E-02        |

| <b>Gene</b>          | <b>topSNP</b> | <b>p_eQTL</b> | <b>p_SMR</b> | <b>p_HEIDI</b> | <b>adjp_SMR</b> |
|----------------------|---------------|---------------|--------------|----------------|-----------------|
| <i>HIST1H4K</i>      | rs1005127     | 2.32E-03      | 4.07E-03     | NA             | 1.85E-02        |
| <i>SLC39A7</i>       | rs2395401     | 1.23E-03      | 4.05E-03     | NA             | 1.85E-02        |
| <i>PABPC1P7</i>      | rs13107325    | 3.21E-03      | 5.49E-03     | NA             | 1.85E-02        |
| <i>CYP17A1-AS1</i>   | rs35525740    | 1.93E-03      | 4.11E-03     | NA             | 1.86E-02        |
| <i>DNAH1</i>         | rs11717383    | 8.92E-04      | 4.14E-03     | NA             | 1.86E-02        |
| <i>RP11-350N15.4</i> | rs9198        | 1.74E-03      | 5.56E-03     | NA             | 1.86E-02        |
| <i>CRY2</i>          | rs61882709    | 1.75E-03      | 4.19E-03     | NA             | 1.86E-02        |
| <i>RP11-245J9.6</i>  | rs7627690     | 4.47E-04      | 2.56E-03     | NA             | 1.88E-02        |
| <i>TEX264</i>        | rs7622851     | 9.12E-04      | 4.28E-03     | NA             | 1.88E-02        |
| <i>RP11-664I21.6</i> | rs12283429    | 1.32E-03      | 4.39E-03     | NA             | 1.89E-02        |
| <i>ALDH16A1</i>      | rs7047        | 2.16E-03      | 5.71E-03     | NA             | 1.90E-02        |
| <i>RP11-62H7.2</i>   | rs2948286     | 6.16E-05      | 2.91E-03     | NA             | 1.90E-02        |
| <i>OR2H5P</i>        | rs1737082     | 1.43E-03      | 3.66E-03     | NA             | 1.91E-02        |
| <i>L3MBTL2</i>       | rs5758268     | 6.39E-04      | 3.37E-03     | NA             | 1.91E-02        |
| <i>SNRNP35</i>       | rs4148862     | 1.65E-03      | 4.50E-03     | NA             | 1.92E-02        |
| <i>CTD-2574D22.2</i> | rs4424923     | 1.36E-03      | 4.41E-03     | NA             | 1.92E-02        |
| <i>SBNO1</i>         | rs7139321     | 1.70E-03      | 4.53E-03     | NA             | 1.92E-02        |
| <i>POM121L2</i>      | rs9348746     | 1.86E-03      | 4.47E-03     | NA             | 1.93E-02        |
| <i>RP11-12M9.3</i>   | rs12158335    | 1.03E-03      | 4.48E-03     | NA             | 1.93E-02        |
| <i>RP11-214K3.21</i> | rs655293      | 3.00E-04      | 1.73E-03     | NA             | 1.93E-02        |
| <i>THYN1</i>         | rs11223651    | 1.53E-03      | 3.52E-03     | NA             | 1.94E-02        |
| <i>NAB2</i>          | rs324015      | 1.06E-03      | 3.54E-03     | NA             | 1.94E-02        |
| <i>FCGRT</i>         | rs57940349    | 9.87E-04      | 4.68E-03     | NA             | 1.95E-02        |
| <i>CLIC1</i>         | rs2596473     | 1.99E-03      | 6.06E-03     | NA             | 1.96E-02        |
| <i>GOLGA6L3</i>      | rs17600551    | 5.60E-04      | 3.42E-03     | NA             | 1.97E-02        |
| <i>AC005076.5</i>    | rs73210240    | 1.38E-03      | 4.84E-03     | NA             | 1.97E-02        |
| <i>FAM63A</i>        | rs72694955    | 1.11E-03      | 4.69E-03     | NA             | 1.98E-02        |
| <i>HLA-DPB2</i>      | rs210142      | 1.28E-03      | 4.91E-03     | NA             | 1.98E-02        |
| <i>ZSCAN16-AS1</i>   | rs34546986    | 3.40E-03      | 4.21E-03     | NA             | 1.98E-02        |
| <i>KCNK7</i>         | rs1193851     | 3.41E-04      | 2.74E-03     | NA             | 1.98E-02        |
| <i>CTB-134H23.2</i>  | rs4583255     | 1.39E-03      | 3.68E-03     | NA             | 1.99E-02        |
| <i>RP11-68I18.10</i> | rs72694955    | 7.50E-04      | 3.75E-03     | NA             | 1.99E-02        |
| <i>TNF</i>           | rs9266797     | 8.32E-04      | 3.71E-03     | NA             | 1.99E-02        |
| <i>WDR82</i>         | rs11235       | 8.97E-04      | 3.72E-03     | NA             | 1.99E-02        |
| <i>HMGNA4</i>        | rs3757150     | 4.60E-03      | 6.39E-03     | NA             | 2.00E-02        |
| <i>TRIM35</i>        | rs9331950     | 5.70E-04      | 2.83E-03     | NA             | 2.00E-02        |
| <i>STAT6</i>         | rs324015      | 1.23E-03      | 3.91E-03     | NA             | 2.00E-02        |
| <i>PANX3</i>         | rs12283429    | 1.67E-03      | 5.10E-03     | NA             | 2.01E-02        |
| <i>EXOC6B</i>        | rs11903916    | 1.83E-03      | 6.46E-03     | NA             | 2.01E-02        |
| <i>CNTF</i>          | rs708228      | 1.46E-03      | 4.86E-03     | NA             | 2.01E-02        |
| <i>RP11-350N15.5</i> | rs9198        | 9.37E-04      | 3.81E-03     | NA             | 2.03E-02        |
| <i>CTD-3065B20.3</i> | rs6227        | 6.64E-04      | 2.99E-03     | NA             | 2.03E-02        |
| <i>ZSCAN12</i>       | rs6456825     | 3.74E-03      | 6.56E-03     | NA             | 2.03E-02        |

| <b>Gene</b>           | <b>topSNP</b> | <b>p_eQTL</b> | <b>p_SMR</b> | <b>p_HEIDI</b> | <b>adjp_SMR</b> |
|-----------------------|---------------|---------------|--------------|----------------|-----------------|
| <i>CHRM4</i>          | rs11038906    | 2.23E-03      | 4.98E-03     | NA             | 2.04E-02        |
| <i>SCARA3</i>         | rs73229093    | 2.02E-03      | 5.01E-03     | NA             | 2.04E-02        |
| <i>INPP5K</i>         | rs12603592    | 9.17E-04      | 4.17E-03     | NA             | 2.06E-02        |
| <i>RP1-178F10.1</i>   | rs2955367     | 1.92E-04      | 3.94E-03     | NA             | 2.06E-02        |
| <i>RP11-469M7.1</i>   | rs796364      | 2.51E-03      | 4.50E-03     | NA             | 2.07E-02        |
| <i>RPL3P4</i>         | rs11624408    | 9.09E-04      | 4.29E-03     | NA             | 2.08E-02        |
| <i>RP11-541N10.3</i>  | rs7911789     | 2.31E-03      | 4.56E-03     | NA             | 2.08E-02        |
| <i>XPNPEP3</i>        | rs9611469     | 1.30E-03      | 4.59E-03     | NA             | 2.08E-02        |
| <i>ADAMTS8</i>        | rs4936123     | 7.73E-04      | 4.40E-03     | NA             | 2.09E-02        |
| <i>RP11-85F14.5</i>   | rs9845788     | 2.22E-03      | 6.87E-03     | NA             | 2.09E-02        |
| <i>GTF3C3</i>         | rs11900232    | 3.23E-03      | 6.94E-03     | NA             | 2.09E-02        |
| <i>NFKBIL1</i>        | rs113239947   | 1.02E-03      | 4.02E-03     | NA             | 2.10E-02        |
| <i>RP11-47A8.5</i>    | rs10430665    | 3.26E-03      | 5.43E-03     | NA             | 2.10E-02        |
| <i>STT3A</i>          | rs12541       | 1.05E-03      | 4.14E-03     | NA             | 2.10E-02        |
| <i>ABHD14A</i>        | rs1060330     | 6.55E-05      | 1.14E-03     | NA             | 2.11E-02        |
| <i>SMIM4</i>          | rs7629072     | 1.44E-03      | 5.51E-03     | NA             | 2.11E-02        |
| <i>CTSK</i>           | rs72694955    | 5.96E-04      | 3.30E-03     | NA             | 2.12E-02        |
| <i>SCARNA6</i>        | rs6710294     | 2.19E-03      | 4.53E-03     | NA             | 2.12E-02        |
| <i>LST1</i>           | rs3130628     | 3.12E-03      | 4.58E-03     | NA             | 2.13E-02        |
| <i>RORA</i>           | rs11071612    | 8.63E-04      | 4.23E-03     | NA             | 2.13E-02        |
| <i>AC007238.1</i>     | rs1518394     | 1.40E-03      | 4.83E-03     | NA             | 2.14E-02        |
| <i>RANP1</i>          | rs2233960     | 2.34E-03      | 7.12E-03     | NA             | 2.14E-02        |
| <i>LINC00167</i>      | rs10791098    | 1.74E-03      | 4.68E-03     | NA             | 2.14E-02        |
| <i>RP11-455F5.4</i>   | rs4583255     | 3.65E-03      | 7.32E-03     | NA             | 2.16E-02        |
| <i>TRIM8</i>          | rs12573474    | 3.12E-03      | 7.33E-03     | NA             | 2.16E-02        |
| <i>TTYH3</i>          | rs1476887     | 4.22E-03      | 7.38E-03     | NA             | 2.16E-02        |
| <i>CTA-150C2.13</i>   | rs55898159    | 1.47E-03      | 5.14E-03     | NA             | 2.17E-02        |
| <i>EMX1</i>           | rs11903916    | 1.21E-03      | 5.08E-03     | NA             | 2.17E-02        |
| <i>HLA-A</i>          | rs1610721     | 2.58E-03      | 5.14E-03     | NA             | 2.17E-02        |
| <i>MUSTN1</i>         | rs11235       | 1.49E-03      | 5.06E-03     | NA             | 2.17E-02        |
| <i>SCARNA5</i>        | rs11535       | 2.51E-03      | 4.98E-03     | NA             | 2.17E-02        |
| <i>PPP1R2P1</i>       | rs2395401     | 1.52E-03      | 4.64E-03     | NA             | 2.19E-02        |
| <i>NFAM1</i>          | rs5758645     | 2.01E-03      | 5.23E-03     | NA             | 2.20E-02        |
| <i>CTA-14H9.5</i>     | rs13204572    | 2.61E-03      | 3.49E-03     | NA             | 2.22E-02        |
| <i>HIST2H3PS2</i>     | rs7555080     | 1.26E-03      | 4.91E-03     | NA             | 2.22E-02        |
| <i>ZNF764</i>         | rs4424923     | 1.61E-03      | 4.91E-03     | NA             | 2.22E-02        |
| <i>TAP2</i>           | rs3129950     | 4.05E-03      | 5.37E-03     | NA             | 2.23E-02        |
| <i>RP11-671M22.4</i>  | rs2135551     | 8.96E-04      | 4.38E-03     | NA             | 2.23E-02        |
| <i>RP11-365N19.2</i>  | rs12891288    | 7.21E-04      | 4.53E-03     | NA             | 2.24E-02        |
| <i>PNMA2</i>          | rs3808573     | 1.48E-03      | 5.95E-03     | NA             | 2.24E-02        |
| <i>RPS18</i>          | rs1130126     | 3.05E-03      | 5.97E-03     | NA             | 2.24E-02        |
| <i>AKT3</i>           | rs3006916     | 1.06E-03      | 4.96E-03     | NA             | 2.24E-02        |
| <i>RP11-1246C19.1</i> | rs4719431     | 4.67E-03      | 7.79E-03     | NA             | 2.24E-02        |



| Gene                    | topSNP     | p_eQTL   | p_SMR    | p_HEIDI | adjp_SMR |
|-------------------------|------------|----------|----------|---------|----------|
| <i>SLC43A1</i>          | rs708228   | 3.02E-03 | 7.77E-03 | NA      | 2.24E-02 |
| <i>BAG5</i>             | rs12891288 | 7.45E-04 | 4.61E-03 | NA      | 2.26E-02 |
| <i>LTB</i>              | rs1264318  | 1.26E-03 | 2.39E-03 | NA      | 2.26E-02 |
| <i>EIF2B4</i>           | rs12474906 | 9.73E-04 | 5.17E-03 | NA      | 2.27E-02 |
| <i>SOX2-OT</i>          | rs1871355  | 1.21E-03 | 5.13E-03 | NA      | 2.27E-02 |
| <i>PRRC2A</i>           | rs2736176  | 1.49E-03 | 3.50E-03 | NA      | 2.28E-02 |
| <i>AKT1</i>             | rs2223937  | 2.27E-03 | 5.26E-03 | NA      | 2.28E-02 |
| <i>CTA-254O6.1</i>      | rs56936192 | 1.37E-03 | 5.33E-03 | NA      | 2.28E-02 |
| <i>CUTA</i>             | rs8084     | 2.19E-03 | 5.35E-03 | NA      | 2.28E-02 |
| <i>ELFN1</i>            | rs6945719  | 2.30E-03 | 4.88E-03 | NA      | 2.28E-02 |
| <i>RP11-272L13.3</i>    | rs4506495  | 2.44E-03 | 4.85E-03 | NA      | 2.28E-02 |
| <i>ARNT</i>             | rs72694957 | 2.08E-03 | 6.04E-03 | NA      | 2.28E-02 |
| <i>SH2B3</i>            | rs12305489 | 4.11E-04 | 2.48E-03 | NA      | 2.29E-02 |
| <i>C10orf95</i>         | rs284856   | 2.44E-04 | 2.58E-03 | NA      | 2.29E-02 |
| <i>RP11-697E2.4</i>     | rs4702     | 1.37E-03 | 3.62E-03 | NA      | 2.31E-02 |
| <i>GABARAPL3</i>        | rs4932178  | 1.21E-03 | 4.77E-03 | NA      | 2.31E-02 |
| <i>RP11-547D24.1</i>    | rs2494631  | 2.39E-03 | 6.33E-03 | NA      | 2.32E-02 |
| <i>ACTG2</i>            | rs11903916 | 1.39E-03 | 5.51E-03 | NA      | 2.32E-02 |
| <i>TBC1D5</i>           | rs2033379  | 1.46E-03 | 5.49E-03 | NA      | 2.32E-02 |
| <i>TMEM219</i>          | rs4788211  | 1.47E-03 | 5.40E-03 | NA      | 2.32E-02 |
| <i>TMEM240</i>          | rs10797426 | 2.04E-03 | 5.49E-03 | NA      | 2.32E-02 |
| <i>GLS2</i>             | rs324017   | 1.74E-03 | 4.94E-03 | NA      | 2.32E-02 |
| <i>PSMG3</i>            | rs4721302  | 1.51E-03 | 5.04E-03 | NA      | 2.33E-02 |
| <i>RP11-752G15.4</i>    | rs4779046  | 2.79E-03 | 8.19E-03 | NA      | 2.33E-02 |
| <i>RP11-383B4.4</i>     | rs2148182  | 1.53E-03 | 5.71E-03 | NA      | 2.33E-02 |
| <i>C10orf76</i>         | rs10883798 | 3.35E-03 | 5.77E-03 | NA      | 2.33E-02 |
| <i>DHX16</i>            | rs3131787  | 4.01E-03 | 5.81E-03 | NA      | 2.33E-02 |
| <i>HCG9</i>             | rs1063320  | 1.49E-03 | 5.90E-03 | NA      | 2.33E-02 |
| <i>MUC21</i>            | rs2596473  | 1.92E-03 | 5.92E-03 | NA      | 2.33E-02 |
| <i>RP11-839D17.3</i>    | rs17602038 | 2.11E-03 | 5.74E-03 | NA      | 2.33E-02 |
| <i>RPL5P34</i>          | rs6002597  | 1.92E-03 | 5.89E-03 | NA      | 2.33E-02 |
| <i>XXbac-BPG308K3.5</i> | rs34546986 | 4.93E-03 | 5.93E-03 | NA      | 2.33E-02 |
| <i>MIB2</i>             | rs16824398 | 2.20E-04 | 1.60E-03 | 0.95    | 2.33E-02 |
| <i>UNCX</i>             | rs56727870 | 7.52E-04 | 1.78E-03 | NA      | 2.33E-02 |
| <i>ZNF165</i>           | rs7750526  | 1.06E-03 | 1.99E-03 | NA      | 2.33E-02 |
| <i>ZNF322</i>           | rs13217675 | 2.67E-04 | 1.68E-03 | 0.46    | 2.33E-02 |
| <i>DUSP11</i>           | rs73947808 | 2.89E-03 | 8.34E-03 | NA      | 2.34E-02 |
| <i>TCHP</i>             | rs3026445  | 2.95E-03 | 8.35E-03 | NA      | 2.34E-02 |
| <i>AC136289.1</i>       | rs832195   | 6.57E-04 | 2.89E-03 | NA      | 2.35E-02 |
| <i>CDK11A</i>           | rs942820   | 9.38E-04 | 3.39E-03 | NA      | 2.35E-02 |
| <i>LSM2</i>             | rs7195     | 1.19E-03 | 3.45E-03 | NA      | 2.35E-02 |
| <i>ADAMTSL4</i>         | rs72694955 | 7.24E-04 | 3.68E-03 | NA      | 2.37E-02 |
| <i>RP11-629G13.1</i>    | rs73001688 | 2.12E-03 | 6.77E-03 | NA      | 2.37E-02 |

| <b>Gene</b>             | <b>topSNP</b> | <b>p_eQTL</b> | <b>p_SMR</b> | <b>p_HEIDI</b> | <b>adjp_SMR</b> |
|-------------------------|---------------|---------------|--------------|----------------|-----------------|
| <i>C2orf69</i>          | rs3769456     | 2.82E-03      | 6.83E-03     | NA             | 2.37E-02        |
| <i>PRR3</i>             | rs3095153     | 7.00E-03      | 8.68E-03     | NA             | 2.41E-02        |
| <i>ANKK1</i>            | rs10750025    | 2.68E-03      | 7.04E-03     | NA             | 2.41E-02        |
| <i>RP13-608F4.1</i>     | rs4779046     | 3.17E-03      | 8.88E-03     | NA             | 2.42E-02        |
| <i>HLA-DRA</i>          | rs3130628     | 4.53E-03      | 6.29E-03     | NA             | 2.43E-02        |
| <i>CDH3</i>             | rs1971546     | 1.72E-03      | 6.63E-03     | NA             | 2.44E-02        |
| <i>NDUFA4L2</i>         | rs324017      | 2.52E-03      | 6.33E-03     | NA             | 2.45E-02        |
| <i>MOG</i>              | rs1059535     | 5.88E-03      | 9.01E-03     | NA             | 2.45E-02        |
| <i>SHISA8</i>           | rs5758268     | 2.33E-03      | 7.19E-03     | NA             | 2.45E-02        |
| <i>TNXB</i>             | rs7195        | 2.62E-03      | 5.96E-03     | NA             | 2.46E-02        |
| <i>NCAM1-AS1</i>        | rs10736470    | 2.40E-03      | 6.53E-03     | NA             | 2.47E-02        |
| <i>CTD-3064M3.7</i>     | rs11778057    | 5.23E-03      | 9.17E-03     | NA             | 2.48E-02        |
| <i>TTC34</i>            | rs942820      | 2.04E-03      | 5.59E-03     | NA             | 2.48E-02        |
| <i>SIAE</i>             | rs12541       | 3.76E-03      | 9.25E-03     | NA             | 2.49E-02        |
| <i>B3GALT4</i>          | rs487835      | 9.20E-04      | 3.89E-03     | NA             | 2.50E-02        |
| <i>TNKS</i>             | rs73191548    | 4.15E-04      | 3.92E-03     | NA             | 2.50E-02        |
| <i>EFTUD1</i>           | rs1269134     | 2.32E-03      | 6.97E-03     | NA             | 2.50E-02        |
| <i>RP4-756G23.5</i>     | rs1894713     | 3.02E-03      | 6.97E-03     | NA             | 2.50E-02        |
| <i>DRG2</i>             | rs9907287     | 1.45E-03      | 7.43E-03     | NA             | 2.50E-02        |
| <i>RP11-153M3.1</i>     | rs324017      | 3.17E-03      | 7.41E-03     | NA             | 2.50E-02        |
| <i>MAFK</i>             | rs56727870    | 4.51E-03      | 7.18E-03     | NA             | 2.52E-02        |
| <i>ENKD1</i>            | rs7187202     | 3.10E-03      | 9.53E-03     | NA             | 2.53E-02        |
| <i>RANBP10</i>          | rs1971546     | 3.15E-03      | 9.50E-03     | NA             | 2.53E-02        |
| <i>RP11-457M11.2</i>    | rs6910549     | 6.99E-03      | 9.55E-03     | NA             | 2.53E-02        |
| <i>ZNF696</i>           | rs7833728     | 3.41E-03      | 9.53E-03     | NA             | 2.53E-02        |
| <i>SNX32</i>            | rs1193851     | 2.25E-03      | 7.66E-03     | NA             | 2.54E-02        |
| <i>TKT</i>              | rs1029871     | 1.80E-03      | 7.66E-03     | NA             | 2.54E-02        |
| <i>ZNF311</i>           | rs1737082     | 4.00E-03      | 7.69E-03     | NA             | 2.54E-02        |
| <i>HIST1H1E</i>         | rs13217675    | 2.61E-03      | 6.78E-03     | NA             | 2.54E-02        |
| <i>ECEL1</i>            | rs6710294     | 4.47E-03      | 7.80E-03     | NA             | 2.55E-02        |
| <i>PTGES3P4</i>         | rs35525740    | 4.16E-03      | 7.36E-03     | NA             | 2.55E-02        |
| <i>COQ10B</i>           | rs3731570     | 3.70E-03      | 9.72E-03     | NA             | 2.55E-02        |
| <i>DDR1</i>             | rs1265092     | 3.56E-03      | 9.84E-03     | NA             | 2.55E-02        |
| <i>RP3-395M20.12</i>    | rs16824398    | 2.92E-03      | 7.53E-03     | NA             | 2.57E-02        |
| <i>XXbac-BPG252P9.9</i> | rs1264352     | 5.67E-03      | 7.57E-03     | NA             | 2.57E-02        |
| <i>CYB5R3</i>           | rs134889      | 4.95E-03      | 9.95E-03     | NA             | 2.57E-02        |
| <i>C15orf40</i>         | rs4779046     | 8.76E-04      | 4.12E-03     | NA             | 2.58E-02        |
| <i>CACNA1D</i>          | rs11177       | 1.60E-03      | 7.63E-03     | NA             | 2.58E-02        |
| <i>RP11-168J18.6</i>    | rs678         | 1.72E-03      | 7.08E-03     | NA             | 2.59E-02        |
| <i>RYBP</i>             | rs9837383     | 2.12E-03      | 7.12E-03     | NA             | 2.59E-02        |
| <i>ARL6IP4</i>          | rs7304782     | 6.35E-03      | 1.01E-02     | NA             | 2.59E-02        |
| <i>FKBP4</i>            | rs1016388     | 3.92E-03      | 6.72E-03     | NA             | 2.59E-02        |
| <i>CROT</i>             | rs73210260    | 2.33E-03      | 7.18E-03     | NA             | 2.60E-02        |

| <b>Gene</b>          | <b>topSNP</b> | <b>p_eQTL</b> | <b>p_SMR</b> | <b>p_HEIDI</b> | <b>adjp_SMR</b> |
|----------------------|---------------|---------------|--------------|----------------|-----------------|
| <i>GLB1L3</i>        | rs73034295    | 3.97E-03      | 7.25E-03     | NA             | 2.60E-02        |
| <i>INHBE</i>         | rs324015      | 3.01E-03      | 7.09E-03     | NA             | 2.60E-02        |
| <i>ENO1-AS1</i>      | rs301792      | 1.90E-03      | 6.78E-03     | NA             | 2.60E-02        |
| <i>NDUFS3</i>        | rs10838634    | 4.98E-03      | 1.04E-02     | NA             | 2.60E-02        |
| <i>RSRC2</i>         | rs10846491    | 4.49E-03      | 1.03E-02     | NA             | 2.60E-02        |
| <i>FGF8</i>          | rs11191359    | 1.37E-03      | 4.39E-03     | NA             | 2.60E-02        |
| <i>MARS2</i>         | rs1429417     | 2.45E-03      | 6.27E-03     | NA             | 2.61E-02        |
| <i>DDX55</i>         | rs4275659     | 3.83E-03      | 8.04E-03     | NA             | 2.61E-02        |
| <i>LRRN3</i>         | rs37716       | 4.30E-03      | 1.06E-02     | NA             | 2.62E-02        |
| <i>LSM1</i>          | rs2306899     | 1.77E-03      | 6.46E-03     | NA             | 2.63E-02        |
| <i>RP11-527N22.2</i> | rs2016875     | 2.22E-03      | 6.62E-03     | NA             | 2.63E-02        |
| <i>TEKT5</i>         | rs7195942     | 9.88E-04      | 6.42E-03     | NA             | 2.63E-02        |
| <i>RP11-512M8.3</i>  | rs4148862     | 3.73E-03      | 7.93E-03     | NA             | 2.64E-02        |
| <i>TM6SF1</i>        | rs1269134     | 2.82E-03      | 7.91E-03     | NA             | 2.64E-02        |
| <i>TAF5</i>          | rs10883842    | 3.91E-03      | 6.98E-03     | NA             | 2.64E-02        |
| <i>GLYCTK-AS1</i>    | rs11235       | 1.13E-03      | 4.28E-03     | NA             | 2.64E-02        |
| <i>CRTC3</i>         | rs4702        | 4.45E-03      | 8.43E-03     | NA             | 2.66E-02        |
| <i>RP11-197N18.7</i> | rs655293      | 3.71E-03      | 8.45E-03     | NA             | 2.66E-02        |
| <i>AMBRA1</i>        | rs10838634    | 3.48E-03      | 8.07E-03     | NA             | 2.66E-02        |
| <i>RP4-740C4.6</i>   | rs942820      | 3.53E-03      | 8.10E-03     | NA             | 2.66E-02        |
| <i>ACP2</i>          | rs12576115    | 4.36E-03      | 8.30E-03     | NA             | 2.67E-02        |
| <i>CTD-2145A24.3</i> | rs9907287     | 1.91E-03      | 8.60E-03     | NA             | 2.68E-02        |
| <i>ORC2</i>          | rs3769446     | 2.81E-03      | 8.76E-03     | NA             | 2.70E-02        |
| <i>RILPL2</i>        | rs11057238    | 5.10E-03      | 1.11E-02     | NA             | 2.70E-02        |
| <i>CLUH</i>          | rs9893573     | 2.34E-03      | 7.70E-03     | NA             | 2.71E-02        |
| <i>CCDC25</i>        | rs73229090    | 2.03E-03      | 5.29E-03     | NA             | 2.71E-02        |
| <i>OPCML</i>         | rs11223651    | 2.59E-03      | 5.19E-03     | NA             | 2.71E-02        |
| <i>RP5-1115A15.1</i> | rs159962      | 1.46E-03      | 5.24E-03     | NA             | 2.71E-02        |
| <i>1-Sep</i>         | rs4424923     | 3.68E-03      | 8.50E-03     | NA             | 2.71E-02        |
| <i>HECW2</i>         | rs3731570     | 9.86E-04      | 4.36E-03     | NA             | 2.72E-02        |
| <i>GABPB2</i>        | rs72694965    | 3.75E-03      | 8.95E-03     | NA             | 2.72E-02        |
| <i>RP11-390K5.6</i>  | rs10838634    | 4.08E-03      | 9.01E-03     | NA             | 2.72E-02        |
| <i>BRINP2</i>        | rs4650963     | 4.36E-04      | 2.75E-03     | NA             | 2.73E-02        |
| <i>DES11</i>         | rs9607850     | 4.07E-04      | 2.78E-03     | NA             | 2.73E-02        |
| <i>MGAT3</i>         | rs9306336     | 2.77E-03      | 8.68E-03     | NA             | 2.73E-02        |
| <i>SLC39A12-AS1</i>  | rs2148182     | 3.05E-03      | 8.69E-03     | NA             | 2.73E-02        |
| <i>CYP11B1</i>       | rs4976982     | 2.54E-03      | 4.74E-03     | NA             | 2.74E-02        |
| <i>HIST2H3D</i>      | rs72694955    | 1.10E-03      | 4.66E-03     | NA             | 2.74E-02        |
| <i>RP3-375P9.2</i>   | rs942496      | 1.20E-03      | 4.62E-03     | NA             | 2.74E-02        |
| <i>TLX2</i>          | rs11903916    | 3.24E-03      | 9.17E-03     | NA             | 2.75E-02        |
| <i>ZBTB12</i>        | rs1046089     | 6.11E-03      | 9.28E-03     | NA             | 2.75E-02        |
| <i>PCGF6</i>         | rs10786701    | 4.54E-03      | 9.56E-03     | NA             | 2.75E-02        |
| <i>RPL29</i>         | rs678         | 2.89E-03      | 9.54E-03     | NA             | 2.75E-02        |

| <b>Gene</b>          | <b>topSNP</b> | <b>p_eQTL</b> | <b>p_SMR</b> | <b>p_HEIDI</b> | <b>adjp_SMR</b> |
|----------------------|---------------|---------------|--------------|----------------|-----------------|
| <i>Y_RNA</i>         | rs10838634    | 4.45E-03      | 9.58E-03     | NA             | 2.75E-02        |
| <i>LLGL1</i>         | rs9907287     | 8.07E-04      | 5.56E-03     | NA             | 2.75E-02        |
| <i>MMP23B</i>        | rs942820      | 1.86E-03      | 5.26E-03     | NA             | 2.75E-02        |
| <i>SLC32A1</i>       | rs2244937     | 1.17E-03      | 5.17E-03     | NA             | 2.75E-02        |
| <i>LFNG</i>          | rs3778970     | 4.89E-03      | 8.91E-03     | NA             | 2.75E-02        |
| <i>NHP2L1</i>        | rs5758645     | 3.03E-03      | 6.94E-03     | NA             | 2.75E-02        |
| <i>CERS2</i>         | rs72694957    | 5.41E-03      | 1.15E-02     | NA             | 2.76E-02        |
| <i>FOXO3</i>         | rs4945816     | 2.24E-03      | 1.15E-02     | NA             | 2.76E-02        |
| <i>SFXN2</i>         | rs284858      | 3.94E-03      | 1.14E-02     | NA             | 2.76E-02        |
| <i>STMN4</i>         | rs2565065     | 5.38E-03      | 1.15E-02     | NA             | 2.76E-02        |
| <i>FBXL15</i>        | rs10883798    | 3.46E-03      | 5.94E-03     | NA             | 2.77E-02        |
| <i>C1orf51</i>       | rs72694965    | 3.80E-03      | 9.03E-03     | NA             | 2.77E-02        |
| <i>C8orf31</i>       | rs11778057    | 4.48E-03      | 8.14E-03     | NA             | 2.78E-02        |
| <i>ITIH3</i>         | rs6769789     | 3.59E-03      | 8.20E-03     | NA             | 2.78E-02        |
| <i>PRC1</i>          | rs35346340    | 3.10E-03      | 8.12E-03     | NA             | 2.78E-02        |
| <i>RP3-508I15.19</i> | rs9306336     | 2.50E-03      | 8.18E-03     | NA             | 2.78E-02        |
| <i>RP1-153G14.4</i>  | rs13217675    | 3.07E-03      | 7.55E-03     | NA             | 2.79E-02        |
| <i>HIST1H2BE</i>     | rs7771468     | 7.57E-04      | 3.43E-03     | NA             | 2.80E-02        |
| <i>EIF4E2</i>        | rs11535       | 4.02E-03      | 7.13E-03     | NA             | 2.81E-02        |
| <i>NEU1</i>          | rs5021453     | 6.37E-03      | 9.95E-03     | NA             | 2.82E-02        |
| <i>EFHD1</i>         | rs6710294     | 5.71E-03      | 9.44E-03     | NA             | 2.83E-02        |
| <i>PBX2</i>          | rs7195        | 5.09E-03      | 9.63E-03     | NA             | 2.85E-02        |
| <i>PTP4A3</i>        | rs72687376    | 3.72E-03      | 9.65E-03     | NA             | 2.85E-02        |
| <i>HIST1H3D</i>      | rs77006546    | 5.43E-03      | 8.71E-03     | NA             | 2.85E-02        |
| <i>RINT1</i>         | rs6968335     | 5.05E-03      | 1.20E-02     | NA             | 2.86E-02        |
| <i>RANGAP1</i>       | rs9607850     | 4.99E-03      | 1.20E-02     | NA             | 2.86E-02        |
| <i>TUBB</i>          | rs3130618     | 6.73E-03      | 8.83E-03     | NA             | 2.86E-02        |
| <i>RP11-196G18.3</i> | rs11589922    | 2.79E-03      | 7.85E-03     | NA             | 2.87E-02        |
| <i>EPHX2</i>         | rs73229093    | 6.87E-03      | 1.21E-02     | NA             | 2.87E-02        |
| <i>HIST2H2BC</i>     | rs72694965    | 5.86E-03      | 1.22E-02     | NA             | 2.87E-02        |
| <i>RTKN</i>          | rs73947808    | 2.48E-03      | 7.57E-03     | NA             | 2.87E-02        |
| <i>ABR</i>           | rs12603592    | 2.83E-03      | 8.18E-03     | NA             | 2.89E-02        |
| <i>PHF1</i>          | rs5021453     | 5.03E-03      | 8.24E-03     | NA             | 2.89E-02        |
| <i>TAPSAR1</i>       | rs204994      | 5.85E-03      | 8.18E-03     | NA             | 2.89E-02        |
| <i>CTC-498M16.4</i>  | rs62378245    | 5.53E-03      | 1.03E-02     | NA             | 2.89E-02        |
| <i>RAB27B</i>        | rs1011339     | 4.13E-03      | 1.03E-02     | NA             | 2.89E-02        |
| <i>U91328.20</i>     | rs34525648    | 5.52E-03      | 7.68E-03     | NA             | 2.89E-02        |
| <i>SMCR2</i>         | rs2955365     | 2.01E-03      | 9.15E-03     | NA             | 2.89E-02        |
| <i>AC009061.1</i>    | rs1971546     | 2.60E-03      | 8.46E-03     | NA             | 2.89E-02        |
| <i>RN7SKP80</i>      | rs28579115    | 3.11E-03      | 8.48E-03     | NA             | 2.89E-02        |
| <i>RAB11FIP1</i>     | rs60530611    | 2.96E-03      | 9.53E-03     | NA             | 2.89E-02        |
| <i>RP11-214K3.20</i> | rs7304782     | 5.96E-03      | 9.65E-03     | NA             | 2.89E-02        |
| <i>SBP1</i>          | rs942496      | 4.06E-03      | 9.91E-03     | NA             | 2.89E-02        |

| <b>Gene</b>          | <b>topSNP</b> | <b>p_eQTL</b> | <b>p_SMR</b> | <b>p_HEIDI</b> | <b>adjp_SMR</b> |
|----------------------|---------------|---------------|--------------|----------------|-----------------|
| <i>TRIM38</i>        | rs6902389     | 8.08E-03      | 9.96E-03     | NA             | 2.89E-02        |
| <i>ATF4</i>          | rs9306336     | 3.52E-03      | 1.01E-02     | NA             | 2.90E-02        |
| <i>MRPL33</i>        | rs4666014     | 2.16E-03      | 1.00E-02     | NA             | 2.90E-02        |
| <i>TPRKB</i>         | rs73947808    | 1.30E-03      | 5.14E-03     | NA             | 2.90E-02        |
| <i>ASPG</i>          | rs10132641    | 3.62E-03      | 7.83E-03     | NA             | 2.90E-02        |
| <i>AC091167.3</i>    | rs4702        | 4.14E-03      | 7.98E-03     | NA             | 2.91E-02        |
| <i>ADAM32</i>        | rs2411256     | 3.09E-03      | 7.94E-03     | NA             | 2.91E-02        |
| <i>CDC42BPB</i>      | rs34633710    | 3.04E-03      | 8.20E-03     | NA             | 2.91E-02        |
| <i>LY6K</i>          | rs7833728     | 2.68E-03      | 8.21E-03     | NA             | 2.91E-02        |
| <i>HIST1H4H</i>      | rs6456728     | 6.48E-03      | 8.67E-03     | NA             | 2.91E-02        |
| <i>BZW1</i>          | rs3769446     | 3.76E-03      | 1.05E-02     | NA             | 2.91E-02        |
| <i>MVP</i>           | rs4424923     | 5.06E-03      | 1.06E-02     | NA             | 2.92E-02        |
| <i>DDX43</i>         | rs1548335     | 4.49E-03      | 1.08E-02     | NA             | 2.93E-02        |
| <i>RP11-44N22.3</i>  | rs2077586     | 4.08E-03      | 1.08E-02     | NA             | 2.93E-02        |
| <i>WBP1L</i>         | rs79237883    | 7.51E-03      | 1.08E-02     | NA             | 2.93E-02        |
| <i>NELFE</i>         | rs9501045     | 1.43E-03      | 5.88E-03     | NA             | 2.93E-02        |
| <i>ENO1</i>          | rs159962      | 3.35E-03      | 8.79E-03     | NA             | 2.93E-02        |
| <i>APOBEC3G</i>      | rs55898159    | 4.35E-03      | 1.03E-02     | NA             | 2.93E-02        |
| <i>CGREF1</i>        | rs12474906    | 3.64E-03      | 1.09E-02     | NA             | 2.94E-02        |
| <i>AC102953.4</i>    | rs1078112     | 5.43E-03      | 1.04E-02     | NA             | 2.94E-02        |
| <i>CD34</i>          | rs12749612    | 2.77E-03      | 1.04E-02     | NA             | 2.94E-02        |
| <i>FAM53C</i>        | rs55985421    | 3.23E-03      | 7.91E-03     | NA             | 2.94E-02        |
| <i>BOLA2</i>         | rs4424923     | 5.30E-03      | 1.10E-02     | NA             | 2.94E-02        |
| <i>RP11-499P20.2</i> | rs4748465     | 4.73E-03      | 1.07E-02     | NA             | 2.94E-02        |
| <i>TTI1</i>          | rs208818      | 4.91E-03      | 9.97E-03     | NA             | 2.94E-02        |
| <i>ZFAND2A</i>       | rs3778998     | 6.96E-03      | 1.27E-02     | NA             | 2.95E-02        |
| <i>PFDN6</i>         | rs1318691     | 4.41E-03      | 1.01E-02     | NA             | 2.96E-02        |
| <i>TRIM39</i>        | rs3129984     | 4.66E-03      | 6.12E-03     | NA             | 2.96E-02        |
| <i>CTD-2171N6.1</i>  | rs9964176     | 2.90E-03      | 8.12E-03     | NA             | 2.96E-02        |
| <i>TACC1</i>         | rs17435276    | 4.85E-04      | 4.21E-03     | NA             | 2.97E-02        |
| <i>CTA-989H11.1</i>  | rs133347      | 3.92E-03      | 8.90E-03     | NA             | 2.97E-02        |
| <i>ESRP2</i>         | rs1971546     | 3.96E-03      | 1.09E-02     | NA             | 2.97E-02        |
| <i>TP53TG1</i>       | rs13236006    | 4.62E-03      | 1.12E-02     | NA             | 2.98E-02        |
| <i>TARS2</i>         | rs72694965    | 5.14E-03      | 1.11E-02     | NA             | 2.99E-02        |
| <i>ADAMTSL3</i>      | rs2135551     | 1.92E-03      | 6.77E-03     | NA             | 3.01E-02        |
| <i>CTD-2292P10.4</i> | rs4976982     | 4.24E-03      | 7.09E-03     | NA             | 3.01E-02        |
| <i>OR2B4P</i>        | rs1416920     | 4.90E-03      | 7.06E-03     | NA             | 3.01E-02        |
| <i>PITPNA-AS1</i>    | rs12603592    | 2.20E-03      | 7.00E-03     | NA             | 3.01E-02        |
| <i>TNNC1</i>         | rs4687680     | 2.83E-03      | 6.85E-03     | NA             | 3.01E-02        |
| <i>GPLD1</i>         | rs77006546    | 7.54E-03      | 1.14E-02     | NA             | 3.01E-02        |
| <i>TMEM161A</i>      | rs880090      | 9.43E-04      | 4.44E-03     | NA             | 3.02E-02        |
| <i>HIST1H2BN</i>     | rs1150670     | 8.67E-03      | 1.33E-02     | NA             | 3.02E-02        |
| <i>AC005841.1</i>    | rs1016388     | 3.66E-03      | 6.36E-03     | NA             | 3.02E-02        |

| <b>Gene</b>          | <b>topSNP</b> | <b>p_eQTL</b> | <b>p_SMR</b> | <b>p_HEIDI</b> | <b>adjp_SMR</b> |
|----------------------|---------------|---------------|--------------|----------------|-----------------|
| <i>TWF2</i>          | rs7626551     | 2.67E-03      | 6.74E-03     | NA             | 3.02E-02        |
| <i>BRK1</i>          | rs61432137    | 4.27E-03      | 1.13E-02     | NA             | 3.02E-02        |
| <i>ROBO4</i>         | rs12541       | 4.59E-03      | 1.06E-02     | NA             | 3.02E-02        |
| <i>TBC1D28</i>       | rs9907287     | 3.25E-03      | 1.15E-02     | NA             | 3.03E-02        |
| <i>RP11-397A16.2</i> | rs784255      | 5.84E-03      | 1.06E-02     | NA             | 3.03E-02        |
| <i>MOB4</i>          | rs7582536     | 6.68E-03      | 1.16E-02     | NA             | 3.04E-02        |
| <i>KIAA1755</i>      | rs6093098     | 9.04E-03      | 1.34E-02     | NA             | 3.05E-02        |
| <i>QPRT</i>          | rs4424923     | 5.90E-03      | 1.18E-02     | NA             | 3.05E-02        |
| <i>SATB2-AS1</i>     | rs3769456     | 3.84E-03      | 8.46E-03     | NA             | 3.05E-02        |
| <i>CTB-33G10.1</i>   | rs57940349    | 4.13E-03      | 1.09E-02     | NA             | 3.07E-02        |
| <i>FURIN</i>         | rs4702        | 6.31E-03      | 1.10E-02     | NA             | 3.07E-02        |
| <i>ARHGEF25</i>      | rs73115999    | 1.72E-03      | 6.99E-03     | NA             | 3.07E-02        |
| <i>LPPR5</i>         | rs61786697    | 3.25E-03      | 7.10E-03     | NA             | 3.07E-02        |
| <i>AP000662.9</i>    | rs708228      | 6.86E-03      | 1.36E-02     | NA             | 3.07E-02        |
| <i>HCAR1</i>         | rs7304782     | 7.88E-03      | 1.21E-02     | NA             | 3.08E-02        |
| <i>MAZ</i>           | rs4788211     | 2.42E-03      | 7.30E-03     | NA             | 3.09E-02        |
| <i>GTF2H3</i>        | rs655293      | 5.62E-03      | 1.13E-02     | NA             | 3.09E-02        |
| <i>RP11-390K5.1</i>  | rs7476        | 5.27E-03      | 1.13E-02     | NA             | 3.09E-02        |
| <i>ZFP57</i>         | rs3131336     | 9.83E-03      | 1.12E-02     | NA             | 3.09E-02        |
| <i>ANAPC7</i>        | rs12305489    | 5.31E-03      | 1.18E-02     | NA             | 3.09E-02        |
| <i>TOB2</i>          | rs5758645     | 3.48E-03      | 7.66E-03     | NA             | 3.09E-02        |
| <i>ORC5</i>          | rs41562       | 6.16E-03      | 1.21E-02     | NA             | 3.09E-02        |
| <i>SEC63P1</i>       | rs61786697    | 4.91E-03      | 9.56E-03     | NA             | 3.10E-02        |
| <i>TAPBP</i>         | rs1142323     | 5.90E-03      | 9.57E-03     | NA             | 3.10E-02        |
| <i>JAM3</i>          | rs11223651    | 7.85E-03      | 1.22E-02     | NA             | 3.10E-02        |
| <i>SUMO2P1</i>       | rs3116856     | 9.49E-03      | 1.38E-02     | NA             | 3.11E-02        |
| <i>HIST1H4E</i>      | rs6902389     | 6.93E-03      | 8.68E-03     | NA             | 3.11E-02        |
| <i>ITFG2</i>         | rs2238053     | 5.43E-03      | 8.73E-03     | NA             | 3.11E-02        |
| <i>SH3GL3</i>        | rs950169      | 3.88E-03      | 9.63E-03     | NA             | 3.11E-02        |
| <i>SRSF4</i>         | rs1498231     | 6.36E-03      | 1.39E-02     | NA             | 3.11E-02        |
| <i>NDUFB3</i>        | rs3769456     | 4.51E-03      | 9.47E-03     | NA             | 3.12E-02        |
| <i>RP11-659P15.1</i> | rs708228      | 4.22E-03      | 9.72E-03     | NA             | 3.12E-02        |
| <i>GPR62</i>         | rs13072536    | 1.10E-03      | 4.98E-03     | NA             | 3.12E-02        |
| <i>RP11-243A14.1</i> | rs7195942     | 5.80E-04      | 5.00E-03     | NA             | 3.12E-02        |
| <i>GALNT10</i>       | rs11740474    | 3.85E-03      | 1.29E-02     | NA             | 3.13E-02        |
| <i>HSD11B2</i>       | rs1971546     | 5.15E-03      | 1.29E-02     | NA             | 3.13E-02        |
| <i>NKAPL</i>         | rs2747054     | 1.05E-02      | 1.25E-02     | NA             | 3.13E-02        |
| <i>NT5DC2</i>        | rs11717383    | 5.73E-03      | 1.30E-02     | NA             | 3.13E-02        |
| <i>SLC25A17</i>      | rs9611469     | 5.41E-03      | 1.16E-02     | NA             | 3.13E-02        |
| <i>RP11-620J15.3</i> | rs324015      | 4.68E-03      | 9.66E-03     | NA             | 3.13E-02        |
| <i>PPRC1</i>         | rs10786736    | 3.97E-03      | 7.93E-03     | NA             | 3.13E-02        |
| <i>RP11-278H7.1</i>  | rs10803138    | 2.12E-03      | 6.25E-03     | NA             | 3.14E-02        |
| <i>RP11-677M14.3</i> | rs12541       | 2.07E-03      | 6.28E-03     | NA             | 3.14E-02        |

| <b>Gene</b>          | <b>topSNP</b> | <b>p_eQTL</b> | <b>p_SMR</b> | <b>p_HEIDI</b> | <b>adjp_SMR</b> |
|----------------------|---------------|---------------|--------------|----------------|-----------------|
| <i>LINC00638</i>     | rs4906379     | 5.58E-03      | 9.91E-03     | NA             | 3.14E-02        |
| <i>RP11-225H22.4</i> | rs10883842    | 3.14E-03      | 5.91E-03     | NA             | 3.15E-02        |
| <i>RP11-416N2.4</i>  | rs10786701    | 2.24E-03      | 5.88E-03     | NA             | 3.15E-02        |
| <i>ATAD3A</i>        | rs942820      | 7.69E-03      | 1.41E-02     | NA             | 3.15E-02        |
| <i>RP5-1186N24.3</i> | rs1416920     | 7.40E-03      | 1.00E-02     | NA             | 3.15E-02        |
| <i>NEURL</i>         | rs11191356    | 6.08E-03      | 1.26E-02     | NA             | 3.15E-02        |
| <i>NABP2</i>         | rs324017      | 3.57E-03      | 8.04E-03     | NA             | 3.16E-02        |
| <i>FBXW4</i>         | rs11191356    | 6.13E-03      | 1.26E-02     | NA             | 3.16E-02        |
| <i>INF2</i>          | rs2223937     | 6.85E-03      | 1.18E-02     | NA             | 3.16E-02        |
| <i>RXRБ</i>          | rs511515      | 1.84E-03      | 6.54E-03     | NA             | 3.16E-02        |
| <i>CAD</i>           | rs4666014     | 3.49E-03      | 1.29E-02     | NA             | 3.18E-02        |
| <i>RP5-998N21.4</i>  | rs72694955    | 5.65E-03      | 1.29E-02     | NA             | 3.18E-02        |
| <i>RING1</i>         | rs2001097     | 7.20E-03      | 9.30E-03     | NA             | 3.18E-02        |
| <i>RP11-150O12.1</i> | rs2306899     | 3.17E-03      | 9.18E-03     | NA             | 3.18E-02        |
| <i>HLA-E</i>         | rs9266209     | 7.57E-03      | 1.20E-02     | NA             | 3.19E-02        |
| <i>AC068831.10</i>   | rs4702        | 4.68E-03      | 8.74E-03     | NA             | 3.19E-02        |
| <i>KXD1</i>          | rs1054930     | 4.27E-03      | 8.61E-03     | NA             | 3.19E-02        |
| <i>NFKB2</i>         | rs284856      | 2.30E-03      | 8.27E-03     | NA             | 3.19E-02        |
| <i>TMED2</i>         | rs1790094     | 4.27E-03      | 8.58E-03     | NA             | 3.19E-02        |
| <i>SRPK2</i>         | rs4580973     | 3.73E-03      | 1.01E-02     | NA             | 3.19E-02        |
| <i>RPL41</i>         | rs324015      | 3.63E-03      | 8.07E-03     | NA             | 3.20E-02        |
| <i>GOLGA6L4</i>      | rs62021208    | 3.37E-03      | 9.74E-03     | NA             | 3.23E-02        |
| <i>AP001007.1</i>    | rs12283429    | 5.02E-03      | 1.07E-02     | NA             | 3.23E-02        |
| <i>WNT5B</i>         | rs1016388     | 5.60E-03      | 8.92E-03     | NA             | 3.23E-02        |
| <i>TCTN1</i>         | rs12305489    | 1.49E-03      | 5.24E-03     | NA             | 3.24E-02        |
| <i>CACNA2D4</i>      | rs11062157    | 4.34E-03      | 1.06E-02     | NA             | 3.24E-02        |
| <i>NCAM1</i>         | rs4245150     | 5.14E-03      | 1.06E-02     | NA             | 3.24E-02        |
| <i>RP11-981G7.1</i>  | rs73191548    | 2.96E-03      | 1.06E-02     | NA             | 3.24E-02        |
| <i>CCDC134</i>       | rs6002597     | 2.30E-03      | 6.62E-03     | NA             | 3.24E-02        |
| <i>MAU2</i>          | rs8101938     | 1.88E-03      | 6.58E-03     | NA             | 3.24E-02        |
| <i>TTC14</i>         | rs1871355     | 1.85E-03      | 6.57E-03     | NA             | 3.24E-02        |
| <i>AC087163.2</i>    | rs4584886     | 2.91E-03      | 1.07E-02     | NA             | 3.24E-02        |
| <i>DPH1</i>          | rs2224770     | 1.27E-03      | 5.31E-03     | NA             | 3.24E-02        |
| <i>HIST1H2AG</i>     | rs3757150     | 6.83E-03      | 9.01E-03     | NA             | 3.25E-02        |
| <i>GTPBP1</i>        | rs55898159    | 7.57E-03      | 1.50E-02     | NA             | 3.25E-02        |
| <i>TOMM22</i>        | rs9306336     | 6.48E-03      | 1.48E-02     | NA             | 3.25E-02        |
| <i>AC009093.1</i>    | rs4788211     | 4.50E-03      | 1.09E-02     | NA             | 3.26E-02        |
| <i>LY6G6D</i>        | rs2858310     | 2.45E-03      | 6.75E-03     | NA             | 3.27E-02        |
| <i>CCDC62</i>        | rs1790094     | 9.17E-03      | 1.52E-02     | NA             | 3.27E-02        |
| <i>LINC00637</i>     | rs11623546    | 1.02E-02      | 1.53E-02     | NA             | 3.27E-02        |
| <i>PGAP1</i>         | rs1429417     | 4.87E-03      | 1.01E-02     | NA             | 3.28E-02        |
| <i>RP11-260M19.2</i> | rs10132641    | 5.69E-03      | 1.08E-02     | NA             | 3.30E-02        |
| <i>SLC45A4</i>       | rs11778057    | 6.55E-03      | 1.09E-02     | NA             | 3.30E-02        |

| <b>Gene</b>           | <b>topSNP</b> | <b>p_eQTL</b> | <b>p_SMR</b> | <b>p_HEIDI</b> | <b>adjp_SMR</b> |
|-----------------------|---------------|---------------|--------------|----------------|-----------------|
| <i>ERRFI1</i>         | rs302719      | 3.29E-03      | 8.79E-03     | NA             | 3.31E-02        |
| <i>AC007092.1</i>     | rs11688767    | 6.17E-03      | 1.12E-02     | NA             | 3.31E-02        |
| <i>SERHL2</i>         | rs1047997     | 5.78E-03      | 1.11E-02     | NA             | 3.31E-02        |
| <i>AC004840.9</i>     | rs3800869     | 2.10E-03      | 7.33E-03     | NA             | 3.32E-02        |
| <i>EIF2B1</i>         | rs941306      | 2.84E-03      | 7.40E-03     | NA             | 3.32E-02        |
| <i>RP11-981G7.6</i>   | rs73191548    | 1.44E-03      | 7.21E-03     | NA             | 3.32E-02        |
| <i>RP1-46F2.3</i>     | rs12305489    | 2.58E-03      | 7.36E-03     | NA             | 3.32E-02        |
| <i>CTD-2210P24.4</i>  | rs7476        | 7.42E-03      | 1.44E-02     | NA             | 3.33E-02        |
| <i>NGEF</i>           | rs6710294     | 9.69E-03      | 1.44E-02     | NA             | 3.33E-02        |
| <i>RPL3</i>           | rs55898159    | 7.12E-03      | 1.44E-02     | NA             | 3.33E-02        |
| <i>ZNF826P</i>        | rs880090      | 6.47E-03      | 1.44E-02     | NA             | 3.33E-02        |
| <i>RP1-34B20.4</i>    | rs28551159    | 7.79E-03      | 9.78E-03     | NA             | 3.34E-02        |
| <i>VRK2</i>           | rs1518394     | 4.11E-03      | 9.68E-03     | NA             | 3.34E-02        |
| <i>LY6D</i>           | rs7462788     | 6.34E-03      | 1.05E-02     | NA             | 3.34E-02        |
| <i>METTL21B</i>       | rs73115999    | 3.49E-03      | 1.05E-02     | NA             | 3.34E-02        |
| <i>ALS2CR12</i>       | rs3769446     | 5.31E-03      | 1.30E-02     | NA             | 3.34E-02        |
| <i>TRMT61A</i>        | rs11623546    | 8.37E-03      | 1.30E-02     | NA             | 3.34E-02        |
| <i>AP3B2</i>          | rs1145173     | 4.59E-03      | 1.06E-02     | NA             | 3.34E-02        |
| <i>CRK</i>            | rs9893573     | 4.42E-03      | 1.14E-02     | NA             | 3.35E-02        |
| <i>RN7SL417P</i>      | rs11631921    | 3.61E-03      | 1.15E-02     | NA             | 3.35E-02        |
| <i>SNX8</i>           | rs3800869     | 4.47E-03      | 1.16E-02     | NA             | 3.35E-02        |
| <i>MIR22HG</i>        | rs9893573     | 5.99E-03      | 1.39E-02     | NA             | 3.36E-02        |
| <i>RFXANK</i>         | rs2315022     | 6.37E-03      | 1.39E-02     | NA             | 3.36E-02        |
| <i>RP11-430H10.2</i>  | rs11038864    | 5.85E-03      | 1.18E-02     | NA             | 3.36E-02        |
| <i>DXO</i>            | rs9262696     | 4.66E-03      | 1.14E-02     | NA             | 3.37E-02        |
| <i>HIST1H2BG</i>      | rs4711107     | 7.14E-03      | 1.08E-02     | NA             | 3.37E-02        |
| <i>ANKRD44</i>        | rs12693816    | 5.99E-03      | 1.17E-02     | NA             | 3.37E-02        |
| <i>C14orf144</i>      | rs35498576    | 3.96E-03      | 7.67E-03     | NA             | 3.37E-02        |
| <i>SEPHS2</i>         | rs4583255     | 3.91E-03      | 7.70E-03     | NA             | 3.37E-02        |
| <i>ARRDC3</i>         | rs2247870     | 1.33E-03      | 8.91E-03     | NA             | 3.37E-02        |
| <i>CEP57L1</i>        | rs4945816     | 1.48E-03      | 9.46E-03     | NA             | 3.38E-02        |
| <i>VPS33A</i>         | rs4553407     | 4.50E-03      | 9.37E-03     | NA             | 3.38E-02        |
| <i>HIST1H2BH</i>      | rs34525648    | 1.11E-02      | 1.40E-02     | NA             | 3.38E-02        |
| <i>CENPE</i>          | rs13107325    | 1.10E-02      | 1.51E-02     | NA             | 3.38E-02        |
| <i>RP11-102M11.1</i>  | rs9845788     | 7.33E-03      | 1.50E-02     | NA             | 3.38E-02        |
| <i>MATR3</i>          | rs55985421    | 5.13E-03      | 1.09E-02     | NA             | 3.38E-02        |
| <i>RP11-486F17.1</i>  | rs59695400    | 5.97E-03      | 1.20E-02     | NA             | 3.39E-02        |
| <i>KHK</i>            | rs4666014     | 2.63E-03      | 1.11E-02     | NA             | 3.39E-02        |
| <i>RP11-1167A19.6</i> | rs1193851     | 4.13E-03      | 1.11E-02     | NA             | 3.39E-02        |
| <i>ZBTB9</i>          | rs1130126     | 6.90E-03      | 1.12E-02     | NA             | 3.39E-02        |
| <i>CDC42SE1</i>       | rs72694957    | 2.05E-03      | 5.99E-03     | NA             | 3.39E-02        |
| <i>DDX49</i>          | rs880090      | 1.73E-03      | 6.29E-03     | NA             | 3.39E-02        |
| <i>PPP1R10</i>        | rs3094125     | 4.46E-03      | 5.92E-03     | NA             | 3.39E-02        |



| <b>Gene</b>          | <b>topSNP</b> | <b>p_eQTL</b> | <b>p_SMR</b> | <b>p_HEIDI</b> | <b>adjp_SMR</b> |
|----------------------|---------------|---------------|--------------|----------------|-----------------|
| <i>U91328.22</i>     | rs3734528     | 4.22E-03      | 5.95E-03     | NA             | 3.39E-02        |
| <i>DENR</i>          | rs10846491    | 8.43E-03      | 1.60E-02     | NA             | 3.40E-02        |
| <i>CASP8</i>         | rs3769446     | 7.47E-03      | 1.63E-02     | NA             | 3.40E-02        |
| <i>DMTF1</i>         | rs76349903    | 8.18E-03      | 1.63E-02     | NA             | 3.40E-02        |
| <i>LINC00051</i>     | rs72687376    | 8.15E-03      | 1.63E-02     | NA             | 3.40E-02        |
| <i>HIST1H2BJ</i>     | rs6940638     | 1.01E-02      | 1.42E-02     | NA             | 3.40E-02        |
| <i>FAM216A</i>       | rs11065628    | 4.77E-03      | 1.20E-02     | NA             | 3.41E-02        |
| <i>GIT2</i>          | rs12305489    | 5.44E-03      | 1.20E-02     | NA             | 3.41E-02        |
| <i>TRPM4</i>         | rs57940349    | 7.01E-03      | 1.54E-02     | NA             | 3.42E-02        |
| <i>ALMS1-IT1</i>     | rs73947808    | 5.29E-03      | 1.23E-02     | NA             | 3.43E-02        |
| <i>CKAP5</i>         | rs10838634    | 6.31E-03      | 1.23E-02     | NA             | 3.43E-02        |
| <i>LINC00533</i>     | rs7764642     | 1.08E-02      | 1.23E-02     | NA             | 3.43E-02        |
| <i>RP11-253E3.1</i>  | rs11062157    | 5.16E-03      | 1.18E-02     | NA             | 3.44E-02        |
| <i>ADAM9</i>         | rs60530611    | 2.26E-03      | 8.15E-03     | NA             | 3.44E-02        |
| <i>FAM83D</i>        | rs2263750     | 4.55E-03      | 8.72E-03     | NA             | 3.44E-02        |
| <i>METTL16</i>       | rs216221      | 3.25E-03      | 8.44E-03     | NA             | 3.44E-02        |
| <i>NISCH</i>         | rs7626551     | 3.47E-03      | 8.07E-03     | NA             | 3.44E-02        |
| <i>RP11-154H23.3</i> | rs7610856     | 2.77E-03      | 8.57E-03     | NA             | 3.44E-02        |
| <i>TUSC5</i>         | rs9893573     | 2.93E-03      | 8.84E-03     | NA             | 3.44E-02        |
| <i>HIST2H2AC</i>     | rs11589922    | 5.65E-03      | 1.25E-02     | NA             | 3.44E-02        |
| <i>CALHM2</i>        | rs79237883    | 9.10E-03      | 1.27E-02     | NA             | 3.44E-02        |
| <i>CS</i>            | rs324017      | 8.18E-03      | 1.46E-02     | NA             | 3.44E-02        |
| <i>C12orf65</i>      | rs585522      | 8.12E-03      | 1.49E-02     | NA             | 3.45E-02        |
| <i>MICF</i>          | rs1610645     | 9.81E-03      | 1.49E-02     | NA             | 3.45E-02        |
| <i>PRKCZ</i>         | rs16824398    | 6.17E-03      | 1.26E-02     | NA             | 3.46E-02        |
| <i>ACRV1</i>         | rs12283429    | 4.58E-03      | 9.99E-03     | NA             | 3.46E-02        |
| <i>AC018766.5</i>    | rs7047        | 3.18E-03      | 7.43E-03     | NA             | 3.46E-02        |
| <i>CTB-12O2.1</i>    | rs11167584    | 3.47E-03      | 8.37E-03     | NA             | 3.46E-02        |
| <i>PLCH2</i>         | rs942820      | 3.87E-03      | 8.63E-03     | NA             | 3.46E-02        |
| <i>PROK2</i>         | rs7610856     | 2.76E-03      | 8.57E-03     | NA             | 3.46E-02        |
| <i>PSMB9</i>         | rs1142323     | 4.55E-03      | 7.81E-03     | NA             | 3.46E-02        |
| <i>RP11-264B17.4</i> | rs4583255     | 4.51E-03      | 8.56E-03     | NA             | 3.46E-02        |
| <i>SAPCD1</i>        | rs3130281     | 6.05E-03      | 8.11E-03     | NA             | 3.46E-02        |
| <i>ARFGAP2</i>       | rs61882709    | 1.03E-02      | 1.58E-02     | NA             | 3.46E-02        |
| <i>CHST1</i>         | rs61882709    | 1.03E-02      | 1.58E-02     | NA             | 3.46E-02        |
| <i>RPL39P3</i>       | rs1548335     | 7.89E-03      | 1.58E-02     | NA             | 3.46E-02        |
| <i>SEZ6L2</i>        | rs4424923     | 2.47E-03      | 6.50E-03     | NA             | 3.47E-02        |
| <i>H6PD</i>          | rs159962      | 7.49E-03      | 1.51E-02     | NA             | 3.48E-02        |
| <i>FAM65A</i>        | rs1971546     | 5.12E-03      | 1.29E-02     | NA             | 3.48E-02        |
| <i>FZD3</i>          | rs9331950     | 6.28E-03      | 1.29E-02     | NA             | 3.48E-02        |
| <i>GLTP</i>          | rs12305489    | 6.10E-03      | 1.30E-02     | NA             | 3.48E-02        |
| <i>RP11-54C4.2</i>   | rs72801007    | 5.98E-03      | 1.29E-02     | NA             | 3.48E-02        |
| <i>ATF4P4</i>        | rs17602038    | 1.01E-02      | 1.72E-02     | NA             | 3.49E-02        |

| <b>Gene</b>           | <b>topSNP</b> | <b>p_eQTL</b> | <b>p_SMR</b> | <b>p_HEIDI</b> | <b>adjp_SMR</b> |
|-----------------------|---------------|---------------|--------------|----------------|-----------------|
| <i>HIST1H1D</i>       | rs47111107    | 4.01E-03      | 6.78E-03     | NA             | 3.50E-02        |
| <i>TGM2</i>           | rs12625702    | 2.36E-03      | 6.89E-03     | NA             | 3.50E-02        |
| <i>RP11-586K2.1</i>   | rs10955542    | 7.86E-03      | 1.61E-02     | NA             | 3.50E-02        |
| <i>SPCS1</i>          | rs34017441    | 4.23E-03      | 1.29E-02     | NA             | 3.50E-02        |
| <i>MEN1</i>           | rs1193851     | 4.85E-03      | 1.23E-02     | NA             | 3.50E-02        |
| <i>RNU1-60P</i>       | rs35065479    | 5.23E-03      | 1.73E-02     | NA             | 3.50E-02        |
| <i>LRRC25</i>         | rs8101938     | 5.75E-03      | 1.33E-02     | NA             | 3.51E-02        |
| <i>RP11-261C10.7</i>  | rs3006916     | 6.15E-03      | 1.43E-02     | NA             | 3.51E-02        |
| <i>B3GNT4</i>         | rs7957096     | 7.15E-03      | 1.24E-02     | NA             | 3.52E-02        |
| <i>TMEM183AP1</i>     | rs1633081     | 7.98E-03      | 1.31E-02     | NA             | 3.53E-02        |
| <i>AL512428.1</i>     | rs7771468     | 8.57E-03      | 1.63E-02     | NA             | 3.54E-02        |
| <i>DGKI</i>           | rs1647181     | 8.69E-03      | 1.58E-02     | NA             | 3.54E-02        |
| <i>RP11-58A17.3</i>   | rs324017      | 9.09E-03      | 1.58E-02     | NA             | 3.54E-02        |
| <i>SUGP1</i>          | rs747050      | 1.00E-02      | 1.63E-02     | NA             | 3.54E-02        |
| <i>UQCRFS1P1</i>      | rs5757754     | 8.31E-03      | 1.59E-02     | NA             | 3.54E-02        |
| <i>SLC35E2</i>        | rs2494635     | 2.54E-03      | 7.12E-03     | NA             | 3.54E-02        |
| <i>CTD-3064M3.4</i>   | rs72687376    | 4.64E-03      | 1.12E-02     | NA             | 3.55E-02        |
| <i>SERHL</i>          | rs12158335    | 4.51E-03      | 1.11E-02     | NA             | 3.55E-02        |
| <i>ARHGAP40</i>       | rs4812320     | 8.17E-03      | 1.36E-02     | NA             | 3.55E-02        |
| <i>HIST1H2AE</i>      | rs28360595    | 1.07E-02      | 1.35E-02     | NA             | 3.55E-02        |
| <i>MCFD2P1</i>        | rs9301        | 8.94E-03      | 1.33E-02     | NA             | 3.55E-02        |
| <i>MMP23A</i>         | rs16824398    | 6.64E-03      | 1.32E-02     | NA             | 3.55E-02        |
| <i>RP11-430H10.4</i>  | rs61882709    | 7.71E-03      | 1.26E-02     | NA             | 3.55E-02        |
| <i>RP11-752G15.6</i>  | rs1269134     | 6.49E-03      | 1.37E-02     | NA             | 3.55E-02        |
| <i>SEPHS1P6</i>       | rs11688168    | 9.20E-03      | 1.36E-02     | NA             | 3.55E-02        |
| <i>PPP4C</i>          | rs4583255     | 8.08E-03      | 1.33E-02     | NA             | 3.55E-02        |
| <i>GNBP1</i>          | rs210142      | 3.65E-03      | 9.43E-03     | NA             | 3.55E-02        |
| <i>RP5-1042K10.13</i> | rs9611488     | 3.96E-03      | 9.41E-03     | NA             | 3.55E-02        |
| <i>CCDC68</i>         | rs72936313    | 8.22E-03      | 1.37E-02     | NA             | 3.55E-02        |
| <i>EHD1</i>           | rs1193851     | 5.72E-03      | 1.37E-02     | NA             | 3.55E-02        |
| <i>YJEFN3</i>         | rs880090      | 5.97E-03      | 1.36E-02     | NA             | 3.55E-02        |
| <i>RP11-338N10.2</i>  | rs159962      | 5.93E-03      | 1.29E-02     | NA             | 3.55E-02        |
| <i>MRPS23</i>         | rs35065479    | 1.61E-03      | 9.55E-03     | NA             | 3.55E-02        |
| <i>PTPMT1</i>         | rs10838634    | 5.88E-03      | 1.17E-02     | NA             | 3.56E-02        |
| <i>TXNL1</i>          | rs72936329    | 6.13E-03      | 1.13E-02     | NA             | 3.56E-02        |
| <i>RP11-159D12.2</i>  | rs35065479    | 3.92E-03      | 1.49E-02     | NA             | 3.56E-02        |
| <i>FLCN</i>           | rs9890563     | 6.66E-03      | 1.77E-02     | NA             | 3.57E-02        |
| <i>KLC1</i>           | rs3212090     | 8.21E-03      | 1.31E-02     | NA             | 3.57E-02        |
| <i>SLC45A1</i>        | rs159962      | 6.11E-03      | 1.31E-02     | NA             | 3.58E-02        |
| <i>HIST1H2AK</i>      | rs2275508     | 1.18E-02      | 1.71E-02     | NA             | 3.58E-02        |
| <i>4-Sep</i>          | rs35065479    | 3.48E-03      | 1.40E-02     | NA             | 3.58E-02        |
| <i>RASAL2-AS1</i>     | rs4650963     | 4.76E-03      | 1.14E-02     | NA             | 3.59E-02        |
| <i>NCK1</i>           | rs9845788     | 9.59E-03      | 1.81E-02     | NA             | 3.59E-02        |

| <b>Gene</b>           | <b>topSNP</b> | <b>p_eQTL</b> | <b>p_SMR</b> | <b>p_HEIDI</b> | <b>adjp_SMR</b> |
|-----------------------|---------------|---------------|--------------|----------------|-----------------|
| <i>FGFR1</i>          | rs16887244    | 7.93E-03      | 1.82E-02     | NA             | 3.60E-02        |
| <i>CCDC15</i>         | rs36053597    | 6.56E-03      | 1.34E-02     | NA             | 3.61E-02        |
| <i>HIST1H3H</i>       | rs13217675    | 7.71E-03      | 1.44E-02     | NA             | 3.62E-02        |
| <i>ATXN7</i>          | rs13272       | 1.04E-02      | 1.84E-02     | NA             | 3.62E-02        |
| <i>HIST1H1PS1</i>     | rs3208733     | 9.98E-03      | 1.85E-02     | NA             | 3.62E-02        |
| <i>TRIM26BP</i>       | rs887465      | 1.48E-02      | 1.85E-02     | NA             | 3.62E-02        |
| <i>STAR</i>           | rs60530611    | 6.36E-03      | 1.53E-02     | NA             | 3.63E-02        |
| <i>HIST1H2BD</i>      | rs34525648    | 1.23E-02      | 1.54E-02     | NA             | 3.63E-02        |
| <i>RASD1</i>          | rs9907287     | 2.28E-03      | 9.43E-03     | NA             | 3.64E-02        |
| <i>NUDT1</i>          | rs1476887     | 1.35E-02      | 1.88E-02     | NA             | 3.64E-02        |
| <i>ATAD3B</i>         | rs942820      | 5.99E-03      | 1.18E-02     | NA             | 3.65E-02        |
| <i>TLR9</i>           | rs11717383    | 5.02E-03      | 1.19E-02     | NA             | 3.65E-02        |
| <i>C19orf73</i>       | rs57940349    | 7.09E-03      | 1.55E-02     | NA             | 3.65E-02        |
| <i>MIEF1</i>          | rs9306336     | 7.16E-03      | 1.58E-02     | NA             | 3.65E-02        |
| <i>RP11-282O18.7</i>  | rs10846491    | 8.18E-03      | 1.57E-02     | NA             | 3.65E-02        |
| <i>IP6K3</i>          | rs487835      | 9.28E-03      | 1.74E-02     | NA             | 3.65E-02        |
| <i>ADRA1A</i>         | rs9331950     | 8.48E-03      | 1.60E-02     | NA             | 3.66E-02        |
| <i>FAM13B</i>         | rs188731      | 5.34E-03      | 1.25E-02     | NA             | 3.66E-02        |
| <i>LINC01023</i>      | rs4388249     | 3.90E-03      | 1.25E-02     | NA             | 3.66E-02        |
| <i>TMEM52</i>         | rs942820      | 6.56E-03      | 1.26E-02     | NA             | 3.66E-02        |
| <i>CALHM1</i>         | rs79237883    | 1.08E-02      | 1.46E-02     | NA             | 3.66E-02        |
| <i>POLR3G</i>         | rs2247870     | 3.38E-03      | 1.40E-02     | NA             | 3.67E-02        |
| <i>NUBP1</i>          | rs7196708     | 8.66E-03      | 1.91E-02     | NA             | 3.67E-02        |
| <i>CNOT8</i>          | rs11740474    | 4.99E-03      | 1.49E-02     | NA             | 3.67E-02        |
| <i>FOXM1</i>          | rs11062170    | 1.12E-02      | 1.48E-02     | NA             | 3.67E-02        |
| <i>RP11-977G19.11</i> | rs324015      | 7.82E-03      | 1.40E-02     | NA             | 3.68E-02        |
| <i>KIFC1</i>          | rs511515      | 6.33E-03      | 1.42E-02     | NA             | 3.68E-02        |
| <i>STAG1</i>          | rs7349597     | 7.42E-03      | 1.41E-02     | NA             | 3.68E-02        |
| <i>RP11-381K20.5</i>  | rs187653      | 7.47E-03      | 1.53E-02     | NA             | 3.68E-02        |
| <i>AC145123.2</i>     | rs7462788     | 1.23E-02      | 1.78E-02     | NA             | 3.69E-02        |
| <i>APLP2</i>          | rs62621284    | 6.64E-03      | 1.80E-02     | NA             | 3.69E-02        |
| <i>EGFL8</i>          | rs1265754     | 1.56E-02      | 1.80E-02     | NA             | 3.69E-02        |
| <i>RP11-54A4.2</i>    | rs72694955    | 9.26E-03      | 1.80E-02     | NA             | 3.69E-02        |
| <i>ZFP41</i>          | rs7832163     | 9.52E-03      | 1.79E-02     | NA             | 3.69E-02        |
| <i>UBE2D3</i>         | rs13107325    | 8.98E-03      | 1.27E-02     | NA             | 3.69E-02        |
| <i>RP11-736N17.4</i>  | rs10132641    | 4.90E-03      | 9.74E-03     | NA             | 3.69E-02        |
| <i>SPA17</i>          | rs12283429    | 8.48E-03      | 1.55E-02     | NA             | 3.70E-02        |
| <i>IMMP2L</i>         | rs37716       | 4.31E-03      | 1.06E-02     | NA             | 3.70E-02        |
| <i>KCTD18</i>         | rs3769446     | 3.64E-03      | 1.03E-02     | NA             | 3.70E-02        |
| <i>KRTCAP3</i>        | rs4666014     | 2.41E-03      | 1.06E-02     | NA             | 3.70E-02        |
| <i>VPS37B</i>         | rs4148862     | 5.40E-03      | 1.03E-02     | NA             | 3.70E-02        |
| <i>HNRNPA1P35</i>     | rs3769446     | 5.40E-03      | 1.32E-02     | NA             | 3.71E-02        |
| <i>KRT17P2</i>        | rs9890563     | 4.06E-03      | 1.33E-02     | NA             | 3.71E-02        |

| <b>Gene</b>             | <b>topSNP</b> | <b>p_eQTL</b> | <b>p_SMR</b> | <b>p_HEIDI</b> | <b>adjp_SMR</b> |
|-------------------------|---------------|---------------|--------------|----------------|-----------------|
| <i>CTC-228N24.3</i>     | rs2764766     | 4.31E-03      | 1.67E-02     | NA             | 3.71E-02        |
| <i>GMIP</i>             | rs880090      | 8.11E-03      | 1.67E-02     | NA             | 3.71E-02        |
| <i>B3GAT1</i>           | rs73034295    | 1.39E-02      | 1.95E-02     | NA             | 3.73E-02        |
| <i>BOLA1</i>            | rs72694955    | 1.05E-02      | 1.96E-02     | NA             | 3.73E-02        |
| <i>HCP5</i>             | rs1046089     | 5.09E-03      | 8.00E-03     | NA             | 3.73E-02        |
| <i>KCNJ13</i>           | rs6710294     | 1.32E-02      | 1.85E-02     | NA             | 3.73E-02        |
| <i>RP1-283E3.4</i>      | rs2477686     | 1.13E-02      | 1.88E-02     | NA             | 3.74E-02        |
| <i>SGOL2</i>            | rs59695400    | 1.11E-02      | 1.88E-02     | NA             | 3.74E-02        |
| <i>ALDH5A1</i>          | rs77006546    | 1.06E-02      | 1.50E-02     | NA             | 3.74E-02        |
| <i>ACTR1A</i>           | rs7911789     | 1.01E-02      | 1.46E-02     | NA             | 3.74E-02        |
| <i>CNPY2</i>            | rs324015      | 8.89E-03      | 1.54E-02     | NA             | 3.74E-02        |
| <i>EMC10</i>            | rs57940349    | 6.97E-03      | 1.54E-02     | NA             | 3.74E-02        |
| <i>RP11-706C16.7</i>    | rs7832163     | 7.43E-03      | 1.51E-02     | NA             | 3.74E-02        |
| <i>ZBTB39</i>           | rs324015      | 8.85E-03      | 1.54E-02     | NA             | 3.74E-02        |
| <i>LRP4</i>             | rs6485685     | 1.27E-02      | 1.99E-02     | NA             | 3.74E-02        |
| <i>RP11-665N17.4</i>    | rs1193851     | 1.01E-02      | 1.99E-02     | NA             | 3.74E-02        |
| <i>ABHD14B</i>          | rs13072536    | 7.50E-03      | 1.62E-02     | NA             | 3.75E-02        |
| <i>ITGAL</i>            | rs4788211     | 8.09E-03      | 1.62E-02     | NA             | 3.75E-02        |
| <i>RP5-892K4.1</i>      | rs2494635     | 8.51E-03      | 1.61E-02     | NA             | 3.75E-02        |
| <i>TMEM218</i>          | rs12541       | 8.52E-03      | 1.62E-02     | NA             | 3.75E-02        |
| <i>C12orf76</i>         | rs12305489    | 9.00E-03      | 1.71E-02     | NA             | 3.76E-02        |
| <i>HIST1H2BC</i>        | rs3208733     | 7.32E-03      | 1.49E-02     | NA             | 3.76E-02        |
| <i>SPN</i>              | rs4788211     | 1.10E-02      | 2.01E-02     | NA             | 3.76E-02        |
| <i>CAPRIN2</i>          | rs302317      | 5.48E-03      | 1.71E-02     | NA             | 3.76E-02        |
| <i>RP11-770G2.2</i>     | rs1193851     | 8.12E-03      | 1.72E-02     | NA             | 3.77E-02        |
| <i>GLI4</i>             | rs7832163     | 3.43E-03      | 8.99E-03     | NA             | 3.77E-02        |
| <i>AC018766.6</i>       | rs7047        | 7.54E-03      | 1.37E-02     | NA             | 3.78E-02        |
| <i>MRPL44</i>           | rs3768886     | 1.08E-02      | 2.03E-02     | NA             | 3.78E-02        |
| <i>CTRL</i>             | rs1971546     | 9.35E-03      | 1.91E-02     | NA             | 3.78E-02        |
| <i>XXbac-BPG308J9.3</i> | rs1611209     | 1.37E-02      | 1.82E-02     | NA             | 3.79E-02        |
| <i>PODXL</i>            | rs10954343    | 8.55E-03      | 1.77E-02     | NA             | 3.79E-02        |
| <i>EPC2</i>             | rs76355118    | 4.79E-03      | 1.49E-02     | NA             | 3.80E-02        |
| <i>SLC35E2B</i>         | rs2494635     | 7.96E-03      | 1.54E-02     | NA             | 3.80E-02        |
| <i>SYBU</i>             | rs7007361     | 1.35E-02      | 2.05E-02     | NA             | 3.80E-02        |
| <i>TNFAIP2</i>          | rs12880077    | 8.26E-03      | 1.78E-02     | NA             | 3.80E-02        |
| <i>THEM6</i>            | rs7462788     | 1.00E-02      | 1.50E-02     | NA             | 3.81E-02        |
| <i>ARMC6</i>            | rs880090      | 7.58E-03      | 1.60E-02     | NA             | 3.82E-02        |
| <i>C2orf47</i>          | rs4270295     | 9.48E-03      | 1.61E-02     | NA             | 3.82E-02        |
| <i>MIEF2</i>            | rs11078410    | 5.18E-03      | 1.60E-02     | NA             | 3.82E-02        |
| <i>RP11-403I13.7</i>    | rs72694955    | 7.60E-03      | 1.57E-02     | NA             | 3.82E-02        |
| <i>RP11-982M15.8</i>    | rs2368560     | 1.02E-02      | 1.59E-02     | NA             | 3.82E-02        |
| <i>SUFU</i>             | rs284854      | 5.85E-03      | 1.55E-02     | NA             | 3.82E-02        |
| <i>TLCD2</i>            | rs9893573     | 7.44E-03      | 1.60E-02     | NA             | 3.82E-02        |

| <b>Gene</b>          | <b>topSNP</b> | <b>p_eQTL</b> | <b>p_SMR</b> | <b>p_HEIDI</b> | <b>adjp_SMR</b> |
|----------------------|---------------|---------------|--------------|----------------|-----------------|
| <i>TTLL1</i>         | rs6002598     | 7.34E-03      | 1.61E-02     | NA             | 3.82E-02        |
| <i>ZBTB18</i>        | rs884328      | 9.30E-03      | 1.79E-02     | NA             | 3.82E-02        |
| <i>FBXL19</i>        | rs4424923     | 5.91E-03      | 1.18E-02     | NA             | 3.82E-02        |
| <i>PTGES3</i>        | rs324017      | 5.74E-03      | 1.13E-02     | NA             | 3.82E-02        |
| <i>TEF</i>           | rs134869      | 6.93E-03      | 1.19E-02     | NA             | 3.82E-02        |
| <i>EXOC3L4</i>       | rs11623546    | 1.37E-02      | 1.94E-02     | NA             | 3.83E-02        |
| <i>RP11-251G23.5</i> | rs4730072     | 6.24E-03      | 1.22E-02     | NA             | 3.83E-02        |
| <i>CCDC155</i>       | rs7047        | 8.33E-03      | 1.48E-02     | NA             | 3.84E-02        |
| <i>LDB1</i>          | rs11191356    | 7.35E-03      | 1.43E-02     | NA             | 3.84E-02        |
| <i>RP11-260M19.1</i> | rs10132641    | 8.55E-03      | 1.47E-02     | NA             | 3.84E-02        |
| <i>ZNF768</i>        | rs4788211     | 7.01E-03      | 1.47E-02     | NA             | 3.84E-02        |
| <i>CTD-3074O7.12</i> | rs1193851     | 4.93E-03      | 1.24E-02     | NA             | 3.85E-02        |
| <i>PRDM16</i>        | rs2494635     | 4.60E-03      | 1.05E-02     | NA             | 3.85E-02        |
| <i>SNX15</i>         | rs1193851     | 9.89E-03      | 1.97E-02     | NA             | 3.85E-02        |
| <i>B4GALNT1</i>      | rs324015      | 5.56E-03      | 1.09E-02     | NA             | 3.86E-02        |
| <i>CCS</i>           | rs1193851     | 4.03E-03      | 1.09E-02     | NA             | 3.86E-02        |
| <i>OSTM1</i>         | rs4945816     | 2.03E-03      | 1.10E-02     | NA             | 3.86E-02        |
| <i>ATP6V1E1P1</i>    | rs3001723     | 1.01E-02      | 1.63E-02     | NA             | 3.86E-02        |
| <i>GIGYF2</i>        | rs709937      | 1.15E-02      | 1.65E-02     | NA             | 3.86E-02        |
| <i>LETM2</i>         | rs17435276    | 6.32E-03      | 1.65E-02     | NA             | 3.86E-02        |
| <i>TCF20</i>         | rs28579115    | 8.56E-03      | 1.67E-02     | NA             | 3.86E-02        |
| <i>FAM72C</i>        | rs12124898    | 1.07E-02      | 1.99E-02     | NA             | 3.87E-02        |
| <i>IZUMO1</i>        | rs7047        | 1.24E-02      | 1.99E-02     | NA             | 3.87E-02        |
| <i>PBK</i>           | rs111659883   | 1.21E-02      | 2.00E-02     | NA             | 3.87E-02        |
| <i>C6orf62</i>       | rs77006546    | 1.38E-02      | 1.88E-02     | NA             | 3.87E-02        |
| <i>FOXP1</i>         | rs9837383     | 8.51E-03      | 1.73E-02     | NA             | 3.87E-02        |
| <i>GPR124</i>        | rs60530611    | 7.82E-03      | 1.74E-02     | NA             | 3.87E-02        |
| <i>IPO11</i>         | rs10041978    | 1.15E-02      | 1.71E-02     | NA             | 3.87E-02        |
| <i>RNF43</i>         | rs35065479    | 5.25E-03      | 1.74E-02     | NA             | 3.87E-02        |
| <i>RP1-140A9.1</i>   | rs16824398    | 9.83E-03      | 1.75E-02     | NA             | 3.87E-02        |
| <i>FUT1</i>          | rs57940349    | 1.07E-02      | 2.05E-02     | NA             | 3.87E-02        |
| <i>PACS1</i>         | rs1193851     | 1.06E-02      | 2.06E-02     | NA             | 3.87E-02        |
| <i>SYPL1</i>         | rs2057884     | 1.31E-02      | 2.07E-02     | NA             | 3.87E-02        |
| <i>ZNF48</i>         | rs4424923     | 1.26E-02      | 2.06E-02     | NA             | 3.87E-02        |
| <i>VPS33B</i>        | rs4702        | 1.44E-02      | 2.10E-02     | NA             | 3.88E-02        |
| <i>APOBEC3F</i>      | rs9306336     | 6.77E-03      | 1.53E-02     | NA             | 3.88E-02        |
| <i>AP000708.1</i>    | rs12541       | 1.06E-02      | 1.89E-02     | NA             | 3.88E-02        |
| <i>TM2D2</i>         | rs2016875     | 9.52E-03      | 1.76E-02     | NA             | 3.88E-02        |
| <i>RP11-426C22.5</i> | rs4424923     | 1.31E-02      | 2.12E-02     | NA             | 3.89E-02        |
| <i>AMZ1</i>          | rs10950456    | 1.20E-02      | 1.73E-02     | NA             | 3.89E-02        |
| <i>METTL1</i>        | rs324015      | 1.35E-02      | 2.11E-02     | NA             | 3.90E-02        |
| <i>RP11-231C14.3</i> | rs4424923     | 4.42E-03      | 9.64E-03     | NA             | 3.90E-02        |
| <i>C10orf112</i>     | rs2148182     | 8.99E-03      | 1.77E-02     | NA             | 3.91E-02        |

| <b>Gene</b>          | <b>topSNP</b> | <b>p_eQTL</b> | <b>p_SMR</b> | <b>p_HEIDI</b> | <b>adjp_SMR</b> |
|----------------------|---------------|---------------|--------------|----------------|-----------------|
| <i>MEF2BNB</i>       | rs4808203     | 1.14E-02      | 1.76E-02     | NA             | 3.91E-02        |
| <i>TNFRSF14</i>      | rs16824398    | 9.95E-03      | 1.77E-02     | NA             | 3.91E-02        |
| <i>CCDC142</i>       | rs11903916    | 9.75E-03      | 1.89E-02     | NA             | 3.91E-02        |
| <i>NXPH4</i>         | rs73115999    | 6.62E-03      | 1.57E-02     | NA             | 3.91E-02        |
| <i>STAB1</i>         | rs7629072     | 1.19E-02      | 2.16E-02     | NA             | 3.91E-02        |
| <i>CDC42P3</i>       | rs7833728     | 7.93E-03      | 1.65E-02     | NA             | 3.92E-02        |
| <i>AL589739.1</i>    | rs16824398    | 1.11E-02      | 1.91E-02     | NA             | 3.93E-02        |
| <i>AC005009.2</i>    | rs73210240    | 7.66E-03      | 1.50E-02     | NA             | 3.93E-02        |
| <i>CBY1</i>          | rs55898159    | 6.29E-03      | 1.32E-02     | NA             | 3.93E-02        |
| <i>FLII</i>          | rs6826        | 4.97E-03      | 1.45E-02     | NA             | 3.93E-02        |
| <i>FUT2</i>          | rs57940349    | 5.91E-03      | 1.38E-02     | NA             | 3.93E-02        |
| <i>KMT2E-AS1</i>     | rs4580973     | 6.40E-03      | 1.44E-02     | NA             | 3.93E-02        |
| <i>PRSS56</i>        | rs2675956     | 9.55E-03      | 1.41E-02     | NA             | 3.93E-02        |
| <i>LRP4-AS1</i>      | rs7476        | 7.96E-03      | 1.52E-02     | NA             | 3.93E-02        |
| <i>ZNF286B</i>       | rs9890563     | 7.74E-03      | 1.94E-02     | NA             | 3.94E-02        |
| <i>RP11-17G12.3</i>  | rs11038864    | 1.33E-02      | 2.15E-02     | NA             | 3.94E-02        |
| <i>CHADL</i>         | rs5758659     | 1.55E-02      | 2.21E-02     | NA             | 3.94E-02        |
| <i>AKAP13</i>        | rs12905223    | 5.73E-03      | 1.34E-02     | NA             | 3.95E-02        |
| <i>AC074091.13</i>   | rs4666014     | 2.89E-03      | 1.17E-02     | NA             | 3.95E-02        |
| <i>COPE</i>          | rs1054930     | 6.34E-03      | 1.15E-02     | NA             | 3.95E-02        |
| <i>DPCR1</i>         | rs2596473     | 5.33E-03      | 1.16E-02     | NA             | 3.95E-02        |
| <i>BAZ2A</i>         | rs73115999    | 7.17E-03      | 1.65E-02     | NA             | 3.95E-02        |
| <i>NTM</i>           | rs73024809    | 5.90E-03      | 1.64E-02     | NA             | 3.95E-02        |
| <i>OR2H2</i>         | rs3116856     | 1.15E-02      | 1.62E-02     | NA             | 3.95E-02        |
| <i>RP11-367G6.3</i>  | rs6910549     | 1.28E-02      | 1.61E-02     | NA             | 3.95E-02        |
| <i>GCKR</i>          | rs4666014     | 3.85E-03      | 1.36E-02     | NA             | 3.95E-02        |
| <i>RP11-297M9.1</i>  | rs9926303     | 5.51E-03      | 1.36E-02     | NA             | 3.95E-02        |
| <i>ZNF804A</i>       | rs62176172    | 8.14E-03      | 1.66E-02     | NA             | 3.95E-02        |
| <i>AP003039.3</i>    | rs10894268    | 1.19E-02      | 1.95E-02     | NA             | 3.96E-02        |
| <i>GRM2</i>          | rs1060330     | 9.38E-03      | 1.84E-02     | NA             | 3.96E-02        |
| <i>RP11-214K3.19</i> | rs4148862     | 1.15E-02      | 1.82E-02     | NA             | 3.96E-02        |
| <i>RP1-92O14.3</i>   | rs3001723     | 1.17E-02      | 1.82E-02     | NA             | 3.96E-02        |
| <i>BIK</i>           | rs134891      | 1.13E-02      | 1.84E-02     | NA             | 3.96E-02        |
| <i>SAP30L</i>        | rs7727515     | 9.47E-03      | 1.83E-02     | NA             | 3.96E-02        |
| <i>C1orf100</i>      | rs12751210    | 5.81E-03      | 1.37E-02     | NA             | 3.96E-02        |
| <i>COL17A1</i>       | rs10883842    | 1.43E-02      | 1.97E-02     | NA             | 3.96E-02        |
| <i>AC018766.4</i>    | rs7047        | 1.12E-02      | 1.84E-02     | NA             | 3.97E-02        |
| <i>RP11-269F20.1</i> | rs1058305     | 9.06E-03      | 1.70E-02     | NA             | 3.98E-02        |
| <i>ZNF664</i>        | rs655293      | 8.62E-03      | 1.54E-02     | NA             | 3.98E-02        |
| <i>SYNGR1</i>        | rs5757754     | 1.12E-02      | 1.98E-02     | NA             | 3.98E-02        |
| <i>PSMB8</i>         | rs1003878     | 1.31E-02      | 1.77E-02     | NA             | 3.98E-02        |
| <i>ADAMTS15</i>      | rs10894268    | 1.22E-02      | 1.99E-02     | NA             | 3.98E-02        |
| <i>USP28</i>         | rs4245150     | 7.59E-03      | 1.40E-02     | NA             | 3.98E-02        |

| <b>Gene</b>          | <b>topSNP</b> | <b>p_eQTL</b> | <b>p_SMR</b> | <b>p_HEIDI</b> | <b>adjp_SMR</b> |
|----------------------|---------------|---------------|--------------|----------------|-----------------|
| <i>ETF1</i>          | rs55985421    | 9.80E-03      | 1.73E-02     | NA             | 3.98E-02        |
| <i>RRP7B</i>         | rs2143139     | 1.02E-02      | 1.70E-02     | NA             | 3.99E-02        |
| <i>AC068831.3</i>    | rs4932178     | 8.02E-03      | 1.60E-02     | NA             | 4.01E-02        |
| <i>CARD11</i>        | rs11768637    | 1.11E-02      | 2.01E-02     | NA             | 4.01E-02        |
| <i>PSMB10</i>        | rs1971546     | 1.15E-02      | 2.20E-02     | NA             | 4.01E-02        |
| <i>CREB3L1</i>       | rs12574918    | 5.66E-03      | 1.21E-02     | NA             | 4.01E-02        |
| <i>MMP16</i>         | rs10955542    | 5.08E-03      | 1.20E-02     | NA             | 4.01E-02        |
| <i>SREBF1</i>        | rs9907287     | 3.58E-03      | 1.21E-02     | NA             | 4.01E-02        |
| <i>DRD2</i>          | rs10736470    | 9.12E-03      | 1.64E-02     | NA             | 4.01E-02        |
| <i>MRPS21</i>        | rs11589922    | 9.66E-03      | 1.81E-02     | NA             | 4.01E-02        |
| <i>LHFPL3</i>        | rs4580973     | 1.06E-02      | 2.02E-02     | NA             | 4.01E-02        |
| <i>RP1-37N7.3</i>    | rs4584886     | 7.56E-03      | 1.87E-02     | NA             | 4.01E-02        |
| <i>TBC1D17</i>       | rs57940349    | 1.24E-02      | 2.27E-02     | NA             | 4.03E-02        |
| <i>FAM180B</i>       | rs10838634    | 1.41E-02      | 2.22E-02     | NA             | 4.03E-02        |
| <i>SOX2</i>          | rs1805589     | 1.15E-02      | 1.77E-02     | NA             | 4.04E-02        |
| <i>HCG25</i>         | rs3130340     | 7.90E-03      | 1.09E-02     | NA             | 4.04E-02        |
| <i>POLD1</i>         | rs7047        | 5.35E-03      | 1.07E-02     | NA             | 4.04E-02        |
| <i>SHMT1</i>         | rs9907287     | 3.03E-03      | 1.10E-02     | NA             | 4.04E-02        |
| <i>NFATC3</i>        | rs1971546     | 1.23E-02      | 2.30E-02     | NA             | 4.04E-02        |
| <i>SCG2</i>          | rs3768886     | 1.29E-02      | 2.30E-02     | NA             | 4.04E-02        |
| <i>RP11-17G12.2</i>  | rs12272795    | 1.53E-02      | 2.24E-02     | NA             | 4.05E-02        |
| <i>ABT1</i>          | rs9348746     | 1.18E-02      | 1.78E-02     | NA             | 4.05E-02        |
| <i>TAOK2</i>         | rs4583255     | 1.21E-02      | 1.83E-02     | NA             | 4.05E-02        |
| <i>TRAF3</i>         | rs35498576    | 1.22E-02      | 1.82E-02     | NA             | 4.05E-02        |
| <i>ZNF395</i>        | rs9331950     | 9.96E-03      | 1.79E-02     | NA             | 4.05E-02        |
| <i>BDH2</i>          | rs13107325    | 1.82E-02      | 2.31E-02     | NA             | 4.05E-02        |
| <i>COQ10A</i>        | rs324017      | 1.18E-02      | 1.92E-02     | NA             | 4.05E-02        |
| <i>RP11-426C22.4</i> | rs4788211     | 1.03E-02      | 1.92E-02     | NA             | 4.05E-02        |
| <i>ABCB1</i>         | rs76349903    | 6.99E-03      | 1.47E-02     | NA             | 4.05E-02        |
| <i>PANK4</i>         | rs2494631     | 8.06E-03      | 1.47E-02     | NA             | 4.05E-02        |
| <i>C1orf222</i>      | rs2494635     | 1.01E-02      | 1.82E-02     | NA             | 4.06E-02        |
| <i>PART1</i>         | rs4604142     | 1.20E-02      | 1.72E-02     | NA             | 4.07E-02        |
| <i>RP3-395M20.8</i>  | rs16824398    | 9.65E-03      | 1.73E-02     | NA             | 4.07E-02        |
| <i>CTD-2373J6.1</i>  | rs6891794     | 1.20E-02      | 1.85E-02     | NA             | 4.07E-02        |
| <i>LINC01004</i>     | rs2299319     | 1.53E-02      | 2.33E-02     | NA             | 4.07E-02        |
| <i>AL022476.2</i>    | rs2071711     | 1.39E-02      | 2.29E-02     | NA             | 4.08E-02        |
| <i>CTC-467M3.3</i>   | rs62378245    | 1.56E-02      | 2.29E-02     | NA             | 4.08E-02        |
| <i>NDUFA13</i>       | rs880090      | 1.12E-02      | 2.10E-02     | NA             | 4.08E-02        |
| <i>G3BP1</i>         | rs17454953    | 9.93E-03      | 1.91E-02     | NA             | 4.08E-02        |
| <i>RP3-508I15.22</i> | rs55898159    | 1.08E-02      | 1.94E-02     | NA             | 4.08E-02        |
| <i>OR2H1</i>         | rs1063320     | 8.55E-03      | 1.76E-02     | NA             | 4.08E-02        |
| <i>RP11-258F1.1</i>  | rs11078410    | 6.37E-03      | 1.80E-02     | NA             | 4.08E-02        |
| <i>MYH14</i>         | rs57940349    | 9.34E-03      | 1.87E-02     | NA             | 4.08E-02        |

| <b>Gene</b>             | <b>topSNP</b> | <b>p_eQTL</b> | <b>p_SMR</b> | <b>p_HEIDI</b> | <b>adjp_SMR</b> |
|-------------------------|---------------|---------------|--------------|----------------|-----------------|
| <i>RNF5P1</i>           | rs2016875     | 1.42E-02      | 2.35E-02     | NA             | 4.09E-02        |
| <i>JAGN1</i>            | rs61432137    | 1.10E-02      | 2.12E-02     | NA             | 4.09E-02        |
| <i>PYGM</i>             | rs1193851     | 1.24E-02      | 2.30E-02     | NA             | 4.09E-02        |
| <i>RP3-395M20.9</i>     | rs2494635     | 5.94E-03      | 1.25E-02     | NA             | 4.10E-02        |
| <i>AC005197.2</i>       | rs880090      | 1.11E-02      | 2.08E-02     | NA             | 4.11E-02        |
| <i>SLX1A</i>            | rs4424923     | 1.15E-02      | 1.92E-02     | NA             | 4.11E-02        |
| <i>MATN1-AS1</i>        | rs1498231     | 1.14E-02      | 2.08E-02     | NA             | 4.11E-02        |
| <i>C1orf233</i>         | rs2477686     | 1.18E-02      | 1.95E-02     | NA             | 4.11E-02        |
| <i>PRRT3-AS1</i>        | rs61432137    | 9.96E-03      | 1.98E-02     | NA             | 4.11E-02        |
| <i>NUDT3</i>            | rs210142      | 1.07E-02      | 1.96E-02     | NA             | 4.12E-02        |
| <i>MAN2A2</i>           | rs4702        | 1.45E-02      | 2.10E-02     | NA             | 4.12E-02        |
| <i>ARHGAP9</i>          | rs324017      | 6.03E-03      | 1.17E-02     | NA             | 4.12E-02        |
| <i>XXbac-BPG308K3.6</i> | rs3131336     | 1.73E-02      | 1.90E-02     | NA             | 4.13E-02        |
| <i>RER1</i>             | rs942820      | 1.24E-02      | 2.01E-02     | NA             | 4.13E-02        |
| <i>CD37</i>             | rs57940349    | 5.27E-03      | 1.28E-02     | NA             | 4.14E-02        |
| <i>CALML6</i>           | rs10797426    | 6.29E-03      | 1.20E-02     | NA             | 4.14E-02        |
| <i>RP1-265C24.8</i>     | rs7750526     | 2.04E-02      | 2.44E-02     | NA             | 4.15E-02        |
| <i>LRRC36</i>           | rs1971546     | 4.81E-03      | 1.23E-02     | NA             | 4.16E-02        |
| <i>NOLC1</i>            | rs7911789     | 1.88E-02      | 2.46E-02     | NA             | 4.16E-02        |
| <i>AC005932.1</i>       | rs880090      | 1.09E-02      | 2.05E-02     | NA             | 4.16E-02        |
| <i>ALDOA</i>            | rs4583255     | 1.25E-02      | 1.87E-02     | NA             | 4.16E-02        |
| <i>CTA-223H9.9</i>      | rs5758527     | 1.07E-02      | 1.87E-02     | NA             | 4.16E-02        |
| <i>ST13</i>             | rs9611469     | 1.05E-02      | 1.86E-02     | NA             | 4.16E-02        |
| <i>HCG15</i>            | rs1063320     | 1.16E-02      | 2.16E-02     | NA             | 4.17E-02        |
| <i>DGUOK</i>            | rs73947808    | 1.19E-02      | 2.15E-02     | NA             | 4.17E-02        |
| <i>MRPL11</i>           | rs1193851     | 1.38E-02      | 2.48E-02     | NA             | 4.17E-02        |
| <i>NR1H2</i>            | rs7047        | 1.64E-02      | 2.48E-02     | NA             | 4.17E-02        |
| <i>KCTD13</i>           | rs4424923     | 6.73E-03      | 1.30E-02     | NA             | 4.18E-02        |
| <i>RP11-45M22.3</i>     | rs6826        | 8.31E-03      | 1.98E-02     | NA             | 4.18E-02        |
| <i>RRP7A</i>            | rs5758645     | 1.27E-02      | 1.99E-02     | NA             | 4.18E-02        |
| <i>AL358813.2</i>       | rs11589922    | 7.95E-03      | 1.58E-02     | NA             | 4.19E-02        |
| <i>BPI</i>              | rs6093098     | 1.93E-02      | 2.52E-02     | NA             | 4.19E-02        |
| <i>RP11-314A5.3</i>     | rs11717383    | 1.49E-02      | 2.52E-02     | NA             | 4.19E-02        |
| <i>TCTN2</i>            | rs655293      | 1.63E-02      | 2.49E-02     | NA             | 4.19E-02        |
| <i>AC122129.1</i>       | rs2955365     | 1.20E-02      | 2.56E-02     | NA             | 4.19E-02        |
| <i>IQCE</i>             | rs3800882     | 1.81E-02      | 2.55E-02     | NA             | 4.19E-02        |
| <i>RP11-568K15.1</i>    | rs4650963     | 1.53E-02      | 2.56E-02     | NA             | 4.19E-02        |
| <i>MUS81</i>            | rs1193851     | 1.02E-02      | 2.01E-02     | NA             | 4.19E-02        |
| <i>CORO1A</i>           | rs4583255     | 1.32E-02      | 1.96E-02     | NA             | 4.21E-02        |
| <i>AOX1</i>             | rs11688168    | 9.42E-03      | 1.38E-02     | NA             | 4.21E-02        |
| <i>CTD-2008L17.1</i>    | rs72936329    | 8.09E-03      | 1.39E-02     | NA             | 4.21E-02        |
| <i>RP11-231C14.4</i>    | rs4424923     | 7.78E-03      | 1.44E-02     | NA             | 4.21E-02        |
| <i>SYNGAP1</i>          | rs176249      | 6.02E-03      | 1.36E-02     | NA             | 4.21E-02        |



| <b>Gene</b>          | <b>topSNP</b> | <b>p_eQTL</b> | <b>p_SMR</b> | <b>p_HEIDI</b> | <b>adjp_SMR</b> |
|----------------------|---------------|---------------|--------------|----------------|-----------------|
| <i>KIAA0319</i>      | rs77006546    | 1.42E-02      | 1.91E-02     | NA             | 4.21E-02        |
| <i>ACY1</i>          | rs13072536    | 1.01E-02      | 1.98E-02     | NA             | 4.21E-02        |
| <i>APLNR</i>         | rs708228      | 1.22E-02      | 2.06E-02     | NA             | 4.21E-02        |
| <i>CTA-250D10.19</i> | rs9611469     | 1.20E-02      | 2.04E-02     | NA             | 4.21E-02        |
| <i>FEZ1</i>          | rs12283429    | 1.18E-02      | 1.97E-02     | NA             | 4.21E-02        |
| <i>RP11-347C12.3</i> | rs4788211     | 1.10E-02      | 2.01E-02     | NA             | 4.21E-02        |
| <i>RP5-951N9.1</i>   | rs11062170    | 1.64E-02      | 2.06E-02     | NA             | 4.21E-02        |
| <i>SNX3</i>          | rs4945816     | 6.80E-03      | 2.04E-02     | NA             | 4.21E-02        |
| <i>SULT1A3</i>       | rs4424923     | 1.23E-02      | 2.02E-02     | NA             | 4.21E-02        |
| <i>ZNF486</i>        | rs880090      | 1.05E-02      | 2.00E-02     | NA             | 4.21E-02        |
| <i>CHRND</i>         | rs6710294     | 1.14E-02      | 1.64E-02     | NA             | 4.21E-02        |
| <i>RP3-395M20.3</i>  | rs2494635     | 8.67E-03      | 1.63E-02     | NA             | 4.21E-02        |
| <i>RP11-473I1.5</i>  | rs7196708     | 6.99E-03      | 1.66E-02     | NA             | 4.21E-02        |
| <i>PARP3</i>         | rs1060330     | 1.36E-02      | 2.39E-02     | NA             | 4.22E-02        |
| <i>CTC-559E9.6</i>   | rs8101938     | 1.07E-02      | 2.02E-02     | NA             | 4.22E-02        |
| <i>KMT2E</i>         | rs2299319     | 1.27E-02      | 2.03E-02     | NA             | 4.22E-02        |
| <i>MARCKSL1P1</i>    | rs11191356    | 1.49E-02      | 2.40E-02     | NA             | 4.23E-02        |
| <i>INPP5D</i>        | rs6710294     | 2.01E-02      | 2.63E-02     | NA             | 4.23E-02        |
| <i>SEMA3B-AS1</i>    | rs9852677     | 2.79E-04      | 2.68E-02     | NA             | 4.23E-02        |
| <i>SFXN5</i>         | rs2077586     | 1.56E-02      | 2.66E-02     | NA             | 4.23E-02        |
| <i>LRRC16A</i>       | rs3734528     | 1.89E-02      | 2.23E-02     | NA             | 4.24E-02        |
| <i>NPM3</i>          | rs2031604     | 1.40E-02      | 2.22E-02     | NA             | 4.24E-02        |
| <i>SCARA5</i>        | rs111659883   | 1.79E-02      | 2.70E-02     | NA             | 4.24E-02        |
| <i>TRPV4</i>         | rs11065628    | 1.10E-02      | 2.09E-02     | NA             | 4.25E-02        |
| <i>MEF2C-AS1</i>     | rs62378245    | 1.68E-02      | 2.43E-02     | NA             | 4.25E-02        |
| <i>C6orf106</i>      | rs1318691     | 1.37E-02      | 2.27E-02     | NA             | 4.26E-02        |
| <i>ADAM22</i>        | rs73210240    | 1.25E-02      | 2.13E-02     | NA             | 4.26E-02        |
| <i>FAT2</i>          | rs2961756     | 1.14E-02      | 2.13E-02     | NA             | 4.26E-02        |
| <i>RP11-677M14.5</i> | rs12283429    | 1.35E-02      | 2.19E-02     | NA             | 4.26E-02        |
| <i>SNRPGP2</i>       | rs9964176     | 1.24E-02      | 2.18E-02     | NA             | 4.26E-02        |
| <i>LRP1</i>          | rs73115999    | 1.11E-02      | 2.20E-02     | NA             | 4.27E-02        |
| <i>NNMT</i>          | rs4245150     | 1.39E-02      | 2.20E-02     | NA             | 4.27E-02        |
| <i>RP11-958J22.1</i> | rs61882712    | 1.38E-02      | 2.07E-02     | NA             | 4.27E-02        |
| <i>KIAA1324L</i>     | rs73206909    | 1.54E-02      | 2.46E-02     | NA             | 4.27E-02        |
| <i>PLEKHG4</i>       | rs1971546     | 1.36E-02      | 2.46E-02     | NA             | 4.27E-02        |
| <i>CYP2W1</i>        | rs34922657    | 1.51E-02      | 2.13E-02     | NA             | 4.27E-02        |
| <i>MORN1</i>         | rs942820      | 1.34E-02      | 2.13E-02     | NA             | 4.27E-02        |
| <i>PDE6D</i>         | rs6710294     | 1.67E-02      | 2.26E-02     | NA             | 4.28E-02        |
| <i>RP11-603J24.5</i> | rs324015      | 1.47E-02      | 2.26E-02     | NA             | 4.28E-02        |
| <i>NDUFA3P4</i>      | rs4932178     | 9.31E-03      | 1.78E-02     | NA             | 4.29E-02        |
| <i>RP11-382A20.6</i> | rs1145173     | 1.39E-02      | 2.32E-02     | NA             | 4.29E-02        |
| <i>RPS11</i>         | rs7047        | 1.67E-02      | 2.50E-02     | NA             | 4.29E-02        |
| <i>SNORA60</i>       | rs6093098     | 1.60E-02      | 2.15E-02     | NA             | 4.29E-02        |

| <b>Gene</b>          | <b>topSNP</b> | <b>p_eQTL</b> | <b>p_SMR</b> | <b>p_HEIDI</b> | <b>adjp_SMR</b> |
|----------------------|---------------|---------------|--------------|----------------|-----------------|
| <i>PRRC1</i>         | rs2764766     | 7.07E-03      | 2.17E-02     | NA             | 4.30E-02        |
| <i>SEMA4B</i>        | rs4702        | 1.51E-02      | 2.17E-02     | NA             | 4.30E-02        |
| <i>CTD-2008L17.2</i> | rs72930740    | 7.32E-03      | 1.53E-02     | NA             | 4.30E-02        |
| <i>MYL6</i>          | rs324015      | 9.96E-03      | 1.68E-02     | NA             | 4.30E-02        |
| <i>RP11-657O9.1</i>  | rs696520      | 9.23E-03      | 1.54E-02     | NA             | 4.30E-02        |
| <i>SUN2</i>          | rs1008677     | 1.07E-02      | 1.66E-02     | NA             | 4.30E-02        |
| <i>VSTM2L</i>        | rs208818      | 9.80E-03      | 1.65E-02     | NA             | 4.30E-02        |
| <i>ACD</i>           | rs1971546     | 1.20E-02      | 2.26E-02     | NA             | 4.30E-02        |
| <i>SATB2</i>         | rs796364      | 1.81E-02      | 2.31E-02     | NA             | 4.32E-02        |
| <i>RP11-752G15.9</i> | rs1269134     | 1.37E-02      | 2.33E-02     | NA             | 4.33E-02        |
| <i>RDH16</i>         | rs324017      | 1.91E-02      | 2.78E-02     | NA             | 4.34E-02        |
| <i>RP11-214K3.23</i> | rs11057238    | 8.17E-03      | 1.54E-02     | NA             | 4.34E-02        |
| <i>SPRYD4</i>        | rs324017      | 1.44E-02      | 2.24E-02     | NA             | 4.35E-02        |
| <i>AF131215.9</i>    | rs73191548    | 9.90E-03      | 2.19E-02     | NA             | 4.35E-02        |
| <i>WDR65</i>         | rs3001723     | 1.47E-02      | 2.18E-02     | NA             | 4.35E-02        |
| <i>APOBEC3B</i>      | rs1008677     | 1.66E-02      | 2.36E-02     | NA             | 4.35E-02        |
| <i>BRD8</i>          | rs256013      | 1.35E-02      | 2.39E-02     | NA             | 4.36E-02        |
| <i>ZSWIM6</i>        | rs4604142     | 1.79E-02      | 2.40E-02     | NA             | 4.36E-02        |
| <i>NOTO</i>          | rs2077586     | 1.21E-02      | 2.23E-02     | NA             | 4.36E-02        |
| <i>SLC4A1AP</i>      | rs12474906    | 1.11E-02      | 2.21E-02     | NA             | 4.36E-02        |
| <i>SSU72</i>         | rs16824398    | 1.36E-02      | 2.23E-02     | NA             | 4.36E-02        |
| <i>AC004447.2</i>    | rs4808203     | 1.64E-02      | 2.36E-02     | NA             | 4.36E-02        |
| <i>HNRNPA1P38</i>    | rs56055628    | 1.37E-02      | 2.37E-02     | NA             | 4.36E-02        |
| <i>MNT</i>           | rs9893573     | 1.32E-02      | 2.38E-02     | NA             | 4.36E-02        |
| <i>SLC9B1</i>        | rs13107325    | 1.91E-02      | 2.41E-02     | NA             | 4.36E-02        |
| <i>SV2A</i>          | rs7555080     | 1.32E-02      | 2.29E-02     | NA             | 4.36E-02        |
| <i>APOBEC3D</i>      | rs5757754     | 1.30E-02      | 2.20E-02     | NA             | 4.36E-02        |
| <i>RP5-1107A17.4</i> | rs35065479    | 6.93E-03      | 2.02E-02     | NA             | 4.36E-02        |
| <i>KCNIP2-AS1</i>    | rs11191356    | 1.63E-02      | 2.57E-02     | NA             | 4.36E-02        |
| <i>SGSM3</i>         | rs55898159    | 1.60E-02      | 2.57E-02     | NA             | 4.36E-02        |
| <i>FBXO41</i>        | rs2077586     | 1.08E-02      | 2.05E-02     | NA             | 4.36E-02        |
| <i>BOLA2B</i>        | rs4424923     | 1.57E-02      | 2.43E-02     | NA             | 4.37E-02        |
| <i>ADSSL1</i>        | rs2368560     | 1.74E-02      | 2.45E-02     | NA             | 4.37E-02        |
| <i>AC010524.2</i>    | rs7047        | 1.34E-02      | 2.11E-02     | NA             | 4.38E-02        |
| <i>RP11-342A23.1</i> | rs17601029    | 1.02E-02      | 2.11E-02     | NA             | 4.38E-02        |
| <i>ERI3</i>          | rs3001723     | 1.58E-02      | 2.31E-02     | NA             | 4.38E-02        |
| <i>RP11-45P15.4</i>  | rs34633710    | 1.46E-02      | 2.42E-02     | NA             | 4.39E-02        |
| <i>TMEM200B</i>      | rs1498231     | 9.23E-03      | 1.79E-02     | NA             | 4.39E-02        |
| <i>MAN2A1</i>        | rs2269201     | 1.10E-02      | 2.50E-02     | NA             | 4.40E-02        |
| <i>DOCK4-AS1</i>     | rs37716       | 1.59E-02      | 2.62E-02     | NA             | 4.40E-02        |
| <i>NPY6R</i>         | rs55985421    | 1.73E-02      | 2.65E-02     | NA             | 4.40E-02        |
| <i>WDR17</i>         | rs1106568     | 1.83E-02      | 2.63E-02     | NA             | 4.40E-02        |
| <i>RBKS</i>          | rs12474906    | 1.05E-02      | 2.13E-02     | NA             | 4.40E-02        |

| <b>Gene</b>          | <b>topSNP</b> | <b>p_eQTL</b> | <b>p_SMR</b> | <b>p_HEIDI</b> | <b>adjp_SMR</b> |
|----------------------|---------------|---------------|--------------|----------------|-----------------|
| <i>ASS1P1</i>        | rs6910549     | 2.10E-02      | 2.51E-02     | NA             | 4.41E-02        |
| <i>CTSW</i>          | rs1193851     | 1.39E-02      | 2.49E-02     | NA             | 4.41E-02        |
| <i>HNRNPKP1</i>      | rs2764766     | 9.32E-03      | 2.53E-02     | NA             | 4.41E-02        |
| <i>HSD17B14</i>      | rs7047        | 1.69E-02      | 2.53E-02     | NA             | 4.41E-02        |
| <i>ZNF691</i>        | rs3001723     | 1.76E-02      | 2.52E-02     | NA             | 4.41E-02        |
| <i>AC135048.1</i>    | rs4788211     | 1.32E-02      | 2.28E-02     | NA             | 4.41E-02        |
| <i>SCNM1</i>         | rs12124898    | 1.77E-02      | 2.87E-02     | NA             | 4.41E-02        |
| <i>RP1-178F10.3</i>  | rs11078410    | 1.14E-02      | 2.55E-02     | NA             | 4.42E-02        |
| <i>RP13-582O9.7</i>  | rs7832163     | 1.30E-02      | 2.24E-02     | NA             | 4.42E-02        |
| <i>PRSS55</i>        | rs73191548    | 1.07E-02      | 2.30E-02     | NA             | 4.42E-02        |
| <i>ZCCHC8</i>        | rs10846491    | 1.36E-02      | 2.26E-02     | NA             | 4.42E-02        |
| <i>KB-1836B5.4</i>   | rs17435276    | 1.22E-02      | 2.50E-02     | NA             | 4.43E-02        |
| <i>CNIH2</i>         | rs1193851     | 1.46E-02      | 2.58E-02     | NA             | 4.44E-02        |
| <i>NOSIP</i>         | rs7047        | 1.74E-02      | 2.58E-02     | NA             | 4.44E-02        |
| <i>SEC13</i>         | rs61432137    | 1.22E-02      | 2.27E-02     | NA             | 4.44E-02        |
| <i>RP11-245J9.5</i>  | rs13272       | 1.91E-02      | 2.90E-02     | NA             | 4.45E-02        |
| <i>FBXO16</i>        | rs9331950     | 1.39E-02      | 2.30E-02     | NA             | 4.45E-02        |
| <i>TMEM59L</i>       | rs4808203     | 1.58E-02      | 2.28E-02     | NA             | 4.45E-02        |
| <i>RP11-12M9.4</i>   | rs9607850     | 1.31E-02      | 2.32E-02     | NA             | 4.45E-02        |
| <i>AP000769.1</i>    | rs1193851     | 1.32E-02      | 2.40E-02     | NA             | 4.45E-02        |
| <i>SGSM2</i>         | rs2224770     | 1.35E-02      | 2.39E-02     | NA             | 4.45E-02        |
| <i>SRSF1</i>         | rs35065479    | 9.28E-03      | 2.39E-02     | NA             | 4.45E-02        |
| <i>ADIG</i>          | rs6093098     | 1.78E-02      | 2.36E-02     | NA             | 4.46E-02        |
| <i>GRM4</i>          | rs9394145     | 1.33E-02      | 2.35E-02     | NA             | 4.46E-02        |
| <i>OBFC1</i>         | rs10786736    | 1.65E-02      | 2.36E-02     | NA             | 4.46E-02        |
| <i>RP11-353N4.4</i>  | rs72694957    | 1.47E-02      | 2.36E-02     | NA             | 4.46E-02        |
| <i>LINC00663</i>     | rs4808203     | 1.21E-02      | 1.84E-02     | NA             | 4.46E-02        |
| <i>RP11-121M22.1</i> | rs73024809    | 7.13E-03      | 1.83E-02     | NA             | 4.46E-02        |
| <i>ITIH1</i>         | rs6769789     | 1.50E-02      | 2.32E-02     | NA             | 4.46E-02        |
| <i>ACTR8</i>         | rs7626551     | 1.22E-02      | 2.00E-02     | NA             | 4.47E-02        |
| <i>CA14</i>          | rs72694955    | 1.06E-02      | 1.98E-02     | NA             | 4.47E-02        |
| <i>RPS2P4</i>        | rs10132641    | 1.28E-02      | 2.00E-02     | NA             | 4.47E-02        |
| <i>RP11-181B11.1</i> | rs2565065     | 1.51E-02      | 2.43E-02     | NA             | 4.47E-02        |
| <i>PSCA</i>          | rs11778057    | 1.97E-02      | 2.65E-02     | NA             | 4.47E-02        |
| <i>RP11-353N4.5</i>  | rs12124898    | 1.57E-02      | 2.63E-02     | NA             | 4.48E-02        |
| <i>BANK1</i>         | rs13107325    | 2.40E-02      | 2.94E-02     | NA             | 4.50E-02        |
| <i>IL4I1</i>         | rs57940349    | 7.89E-03      | 1.67E-02     | NA             | 4.50E-02        |
| <i>LINC00568</i>     | rs72694950    | 9.03E-03      | 1.70E-02     | NA             | 4.50E-02        |
| <i>USP40</i>         | rs6710294     | 1.22E-02      | 1.74E-02     | NA             | 4.50E-02        |
| <i>RP11-752G15.3</i> | rs75884951    | 8.45E-03      | 1.75E-02     | NA             | 4.50E-02        |
| <i>DUSP7</i>         | rs1060330     | 1.42E-02      | 2.46E-02     | NA             | 4.50E-02        |
| <i>ZNF682</i>        | rs4808203     | 1.74E-02      | 2.46E-02     | NA             | 4.50E-02        |
| <i>ATG13</i>         | rs60722866    | 2.01E-02      | 2.74E-02     | NA             | 4.50E-02        |

| <b>Gene</b>           | <b>topSNP</b> | <b>p_eQTL</b> | <b>p_SMR</b> | <b>p_HEIDI</b> | <b>adjp_SMR</b> |
|-----------------------|---------------|---------------|--------------|----------------|-----------------|
| <i>CCDC39</i>         | rs1871355     | 1.35E-02      | 2.39E-02     | NA             | 4.50E-02        |
| <i>RCN3</i>           | rs57940349    | 8.85E-03      | 1.80E-02     | NA             | 4.50E-02        |
| <i>HSPE1</i>          | rs11900232    | 1.97E-02      | 2.76E-02     | NA             | 4.51E-02        |
| <i>WDR81</i>          | rs216221      | 1.76E-02      | 2.76E-02     | NA             | 4.51E-02        |
| <i>CTC-260E6.10</i>   | rs15622       | 1.52E-02      | 2.40E-02     | NA             | 4.51E-02        |
| <i>RUNDC3B</i>        | rs56936192    | 1.63E-02      | 2.71E-02     | NA             | 4.52E-02        |
| <i>CCDC92</i>         | rs10846491    | 1.70E-02      | 2.67E-02     | NA             | 4.52E-02        |
| <i>DCP1B</i>          | rs2238053     | 1.41E-02      | 1.91E-02     | NA             | 4.52E-02        |
| <i>CTC-332L22.1</i>   | rs4388249     | 1.11E-02      | 2.38E-02     | NA             | 4.52E-02        |
| <i>RP11-73M18.11</i>  | rs35498576    | 1.72E-02      | 2.41E-02     | NA             | 4.53E-02        |
| <i>SPATA4</i>         | rs6846161     | 1.63E-02      | 2.39E-02     | NA             | 4.53E-02        |
| <i>RASGRP2</i>        | rs1193851     | 1.35E-02      | 2.44E-02     | NA             | 4.53E-02        |
| <i>C16orf93</i>       | rs4583255     | 1.31E-02      | 1.94E-02     | NA             | 4.53E-02        |
| <i>HLA-DRB9</i>       | rs176249      | 9.65E-03      | 1.87E-02     | NA             | 4.53E-02        |
| <i>SLURP1</i>         | rs4976982     | 1.88E-02      | 2.42E-02     | NA             | 4.54E-02        |
| <i>A4GALT</i>         | rs5758605     | 1.20E-02      | 1.91E-02     | NA             | 4.54E-02        |
| <i>KHDC1</i>          | rs1548335     | 1.03E-02      | 1.91E-02     | NA             | 4.54E-02        |
| <i>RP13-582O9.5</i>   | rs72687376    | 1.74E-02      | 2.80E-02     | NA             | 4.54E-02        |
| <i>SLC12A4</i>        | rs1971546     | 1.63E-02      | 2.81E-02     | NA             | 4.54E-02        |
| <i>BCL11B</i>         | rs11624408    | 1.15E-02      | 2.12E-02     | NA             | 4.54E-02        |
| <i>GET4</i>           | rs6957894     | 1.19E-02      | 1.97E-02     | NA             | 4.54E-02        |
| <i>PRADC1</i>         | rs2077586     | 1.12E-02      | 2.11E-02     | NA             | 4.54E-02        |
| <i>RP11-670E13.2</i>  | rs35065479    | 7.34E-03      | 2.09E-02     | NA             | 4.54E-02        |
| <i>SCAF1</i>          | rs57940349    | 1.05E-02      | 2.03E-02     | NA             | 4.54E-02        |
| <i>RP11-305O4.3</i>   | rs9845788     | 1.54E-02      | 2.54E-02     | NA             | 4.55E-02        |
| <i>FAM227A</i>        | rs9306336     | 1.34E-02      | 2.43E-02     | NA             | 4.55E-02        |
| <i>CLK1</i>           | rs3769446     | 1.54E-02      | 2.68E-02     | NA             | 4.55E-02        |
| <i>NR1H3</i>          | rs7476        | 1.17E-02      | 2.00E-02     | NA             | 4.55E-02        |
| <i>PLXNA4</i>         | rs10954343    | 1.01E-02      | 1.99E-02     | NA             | 4.55E-02        |
| <i>RNU6-312P</i>      | rs3769446     | 1.60E-02      | 2.75E-02     | NA             | 4.56E-02        |
| <i>PEMT</i>           | rs9907287     | 1.60E-02      | 3.04E-02     | NA             | 4.56E-02        |
| <i>RP11-1167A19.2</i> | rs1193851     | 1.84E-02      | 3.05E-02     | NA             | 4.56E-02        |
| <i>AC013472.4</i>     | rs12474906    | 1.50E-02      | 2.71E-02     | NA             | 4.56E-02        |
| <i>BZRAP1-AS1</i>     | rs35065479    | 1.14E-02      | 2.71E-02     | NA             | 4.56E-02        |
| <i>RP11-503P10.1</i>  | rs12474906    | 1.48E-02      | 2.70E-02     | NA             | 4.56E-02        |
| <i>YWHAE</i>          | rs216176      | 1.72E-02      | 2.73E-02     | NA             | 4.56E-02        |
| <i>RP5-821D11.7</i>   | rs5996096     | 1.36E-02      | 2.45E-02     | NA             | 4.57E-02        |
| <i>TMEM184A</i>       | rs6945719     | 2.37E-02      | 3.06E-02     | NA             | 4.57E-02        |
| <i>RPS10</i>          | rs942496      | 1.49E-02      | 2.45E-02     | NA             | 4.57E-02        |
| <i>STAC3</i>          | rs324015      | 2.17E-02      | 3.07E-02     | NA             | 4.57E-02        |
| <i>ZNF90</i>          | rs4808203     | 1.84E-02      | 2.58E-02     | NA             | 4.58E-02        |
| <i>RP11-430H10.1</i>  | rs876701      | 1.76E-02      | 2.48E-02     | NA             | 4.58E-02        |
| <i>ELOVL1</i>         | rs3001723     | 1.37E-02      | 2.06E-02     | NA             | 4.58E-02        |

| <b>Gene</b>           | <b>topSNP</b> | <b>p_eQTL</b> | <b>p_SMR</b> | <b>p_HEIDI</b> | <b>adjp_SMR</b> |
|-----------------------|---------------|---------------|--------------|----------------|-----------------|
| <i>DIABLO</i>         | rs655293      | 1.86E-02      | 2.76E-02     | NA             | 4.59E-02        |
| <i>RP11-977G19.14</i> | rs324017      | 1.91E-02      | 2.78E-02     | NA             | 4.59E-02        |
| <i>RRAS</i>           | rs57940349    | 1.67E-02      | 2.81E-02     | NA             | 4.59E-02        |
| <i>PAM</i>            | rs1823694     | 1.13E-02      | 2.52E-02     | NA             | 4.59E-02        |
| <i>RP11-225H22.5</i>  | rs10883798    | 2.02E-02      | 2.55E-02     | NA             | 4.59E-02        |
| <i>SF3B4</i>          | rs7555080     | 1.75E-02      | 2.81E-02     | NA             | 4.59E-02        |
| <i>C14orf2</i>        | rs35498576    | 1.87E-02      | 2.58E-02     | NA             | 4.60E-02        |
| <i>CACNB2</i>         | rs2148182     | 1.19E-02      | 2.15E-02     | NA             | 4.60E-02        |
| <i>KIF5C</i>          | rs76355118    | 1.22E-02      | 2.62E-02     | NA             | 4.61E-02        |
| <i>PTP4A2P2</i>       | rs73036062    | 1.95E-02      | 2.63E-02     | NA             | 4.61E-02        |
| <i>TSPO</i>           | rs2143139     | 2.23E-02      | 3.12E-02     | NA             | 4.62E-02        |
| <i>RP11-561C5.5</i>   | rs11631921    | 1.36E-02      | 2.64E-02     | NA             | 4.62E-02        |
| <i>HOMER2</i>         | rs4779046     | 1.74E-02      | 2.84E-02     | NA             | 4.62E-02        |
| <i>RP11-109N23.6</i>  | rs2332704     | 1.24E-02      | 2.17E-02     | NA             | 4.63E-02        |
| <i>RP11-522N14.2</i>  | rs7304782     | 1.60E-02      | 2.15E-02     | NA             | 4.63E-02        |
| <i>JOSD1</i>          | rs1008677     | 2.02E-02      | 2.77E-02     | NA             | 4.63E-02        |
| <i>IFT81</i>          | rs11065628    | 1.13E-02      | 2.13E-02     | NA             | 4.64E-02        |
| <i>LINC00852</i>      | rs61432137    | 1.93E-02      | 3.15E-02     | NA             | 4.64E-02        |
| <i>LINC00222</i>      | rs13217795    | 1.20E-02      | 2.88E-02     | NA             | 4.64E-02        |
| <i>RP11-458I7.1</i>   | rs72694965    | 1.84E-02      | 2.81E-02     | NA             | 4.65E-02        |
| <i>PLD5</i>           | rs10803138    | 1.32E-02      | 2.20E-02     | NA             | 4.65E-02        |
| <i>RBMS2</i>          | rs324015      | 1.42E-02      | 2.20E-02     | NA             | 4.66E-02        |
| <i>NIF3L1</i>         | rs3769446     | 1.53E-02      | 2.66E-02     | NA             | 4.66E-02        |
| <i>AC074117.13</i>    | rs4666014     | 1.12E-02      | 2.54E-02     | NA             | 4.66E-02        |
| <i>TMEM179</i>        | rs3861678     | 1.90E-02      | 2.57E-02     | NA             | 4.66E-02        |
| <i>HDDC3</i>          | rs4932178     | 1.86E-02      | 2.93E-02     | NA             | 4.67E-02        |
| <i>RAP1GAP2</i>       | rs2224770     | 1.79E-02      | 2.94E-02     | NA             | 4.67E-02        |
| <i>TAC3</i>           | rs324015      | 2.05E-02      | 2.93E-02     | NA             | 4.67E-02        |
| <i>BRMS1</i>          | rs1193851     | 1.60E-02      | 2.76E-02     | NA             | 4.67E-02        |
| <i>MEF2B</i>          | rs4808203     | 1.99E-02      | 2.75E-02     | NA             | 4.67E-02        |
| <i>COIL</i>           | rs35065479    | 8.00E-03      | 2.20E-02     | NA             | 4.67E-02        |
| <i>RP11-345J4.8</i>   | rs4424923     | 1.38E-02      | 2.21E-02     | NA             | 4.67E-02        |
| <i>RP11-10L12.4</i>   | rs13107325    | 2.63E-02      | 3.19E-02     | NA             | 4.67E-02        |
| <i>PDGFB</i>          | rs55898159    | 1.61E-02      | 2.59E-02     | NA             | 4.67E-02        |
| <i>RP11-697E2.7</i>   | rs4932178     | 1.45E-02      | 2.43E-02     | NA             | 4.68E-02        |
| <i>DGKE</i>           | rs35065479    | 1.15E-02      | 2.72E-02     | NA             | 4.68E-02        |
| <i>MSRA</i>           | rs73191548    | 1.43E-02      | 2.78E-02     | NA             | 4.68E-02        |
| <i>ERCC8</i>          | rs10041978    | 1.93E-02      | 2.61E-02     | NA             | 4.69E-02        |
| <i>GHRL</i>           | rs61432137    | 1.56E-02      | 2.70E-02     | NA             | 4.69E-02        |
| <i>MGEA5</i>          | rs284854      | 1.29E-02      | 2.57E-02     | NA             | 4.69E-02        |
| <i>PCBP4</i>          | rs4687680     | 1.83E-02      | 2.69E-02     | NA             | 4.69E-02        |
| <i>PFKFB2</i>         | rs12749612    | 1.33E-02      | 2.67E-02     | NA             | 4.69E-02        |
| <i>SCAND2P</i>        | rs1051168     | 1.74E-02      | 2.71E-02     | NA             | 4.69E-02        |

| <b>Gene</b>          | <b>topSNP</b> | <b>p_eQTL</b> | <b>p_SMR</b> | <b>p_HEIDI</b> | <b>adjp_SMR</b> |
|----------------------|---------------|---------------|--------------|----------------|-----------------|
| <i>TSSK6</i>         | rs1054284     | 1.81E-02      | 2.62E-02     | NA             | 4.69E-02        |
| <i>HIST2H2BE</i>     | rs72694965    | 1.67E-02      | 2.61E-02     | NA             | 4.69E-02        |
| <i>ARC</i>           | rs72687376    | 1.86E-02      | 2.95E-02     | NA             | 4.69E-02        |
| <i>RP11-486O12.2</i> | rs941306      | 1.93E-02      | 2.90E-02     | NA             | 4.69E-02        |
| <i>PTN</i>           | rs3735026     | 2.33E-02      | 3.23E-02     | NA             | 4.69E-02        |
| <i>CACNA1C-AS1</i>   | rs11062157    | 2.19E-02      | 3.31E-02     | NA             | 4.69E-02        |
| <i>CALHM3</i>        | rs17114641    | 2.37E-02      | 3.33E-02     | NA             | 4.69E-02        |
| <i>DIS3L2</i>        | rs11535       | 2.61E-02      | 3.27E-02     | NA             | 4.69E-02        |
| <i>PPARGC1A</i>      | rs215405      | 1.84E-02      | 3.31E-02     | NA             | 4.69E-02        |
| <i>TANGO6</i>        | rs1971546     | 2.02E-02      | 3.27E-02     | NA             | 4.69E-02        |
| <i>WDFY1</i>         | rs3768886     | 2.13E-02      | 3.32E-02     | NA             | 4.69E-02        |
| <i>CMAHP</i>         | rs77006546    | 2.28E-02      | 2.86E-02     | NA             | 4.70E-02        |
| <i>IL17RE</i>        | rs61432137    | 1.69E-02      | 2.86E-02     | NA             | 4.70E-02        |
| <i>COPS3</i>         | rs4584886     | 1.48E-02      | 2.88E-02     | NA             | 4.71E-02        |
| <i>NRGN</i>          | rs12541       | 1.90E-02      | 2.92E-02     | NA             | 4.71E-02        |
| <i>RP3-508I15.20</i> | rs1008677     | 2.15E-02      | 2.91E-02     | NA             | 4.71E-02        |
| <i>SUGP2</i>         | rs880090      | 1.76E-02      | 2.89E-02     | NA             | 4.71E-02        |
| <i>CTF1</i>          | rs4424923     | 1.63E-02      | 2.50E-02     | NA             | 4.71E-02        |
| <i>ATF7IP2</i>       | rs7199375     | 1.56E-02      | 2.98E-02     | NA             | 4.71E-02        |
| <i>SGK223</i>        | rs2948286     | 2.20E-03      | 2.26E-02     | NA             | 4.72E-02        |
| <i>CTB-113P19.3</i>  | rs2961756     | 1.22E-02      | 2.24E-02     | NA             | 4.72E-02        |
| <i>C22orf46</i>      | rs5758268     | 1.87E-02      | 2.96E-02     | NA             | 4.72E-02        |
| <i>EIF4E3</i>        | rs56343799    | 1.76E-02      | 2.95E-02     | NA             | 4.72E-02        |
| <i>LYPD6</i>         | rs76355118    | 1.47E-02      | 2.95E-02     | NA             | 4.72E-02        |
| <i>PKD2L2</i>        | rs256013      | 1.82E-02      | 2.96E-02     | NA             | 4.73E-02        |
| <i>ZNF592</i>        | rs2135551     | 1.80E-02      | 2.96E-02     | NA             | 4.73E-02        |
| <i>LYSMD3</i>        | rs2247870     | 1.06E-02      | 2.62E-02     | NA             | 4.73E-02        |
| <i>CDK11B</i>        | rs2494635     | 1.60E-02      | 2.56E-02     | NA             | 4.73E-02        |
| <i>TBC1D10B</i>      | rs4583255     | 1.86E-02      | 2.58E-02     | NA             | 4.73E-02        |
| <i>TNRC6B</i>        | rs55898159    | 1.59E-02      | 2.57E-02     | NA             | 4.73E-02        |
| <i>DAXX</i>          | rs1003878     | 1.76E-02      | 2.27E-02     | NA             | 4.74E-02        |
| <i>BNIP3L</i>        | rs3808573     | 1.83E-02      | 3.01E-02     | NA             | 4.75E-02        |
| <i>ADSL</i>          | rs9611469     | 2.00E-02      | 3.01E-02     | NA             | 4.76E-02        |
| <i>RP1-46F2.2</i>    | rs11065628    | 1.27E-02      | 2.31E-02     | NA             | 4.76E-02        |
| <i>AC099684.1</i>    | rs12603592    | 2.27E-02      | 3.44E-02     | NA             | 4.76E-02        |
| <i>AP3S2</i>         | rs4932178     | 2.30E-02      | 3.44E-02     | NA             | 4.76E-02        |
| <i>NYAP2</i>         | rs3768886     | 2.23E-02      | 3.43E-02     | NA             | 4.76E-02        |
| <i>BRAT1</i>         | rs872465      | 1.50E-02      | 2.41E-02     | NA             | 4.76E-02        |
| <i>HCG16</i>         | rs34130214    | 2.10E-02      | 2.43E-02     | NA             | 4.76E-02        |
| <i>PLEKHA4</i>       | rs57940349    | 1.33E-02      | 2.39E-02     | NA             | 4.76E-02        |
| <i>RP11-953B20.1</i> | rs4976982     | 1.79E-02      | 2.32E-02     | NA             | 4.76E-02        |
| <i>RPA1</i>          | rs2224770     | 1.87E-02      | 3.04E-02     | NA             | 4.76E-02        |
| <i>PLD6</i>          | rs11078410    | 1.86E-02      | 3.50E-02     | NA             | 4.76E-02        |

| <b>Gene</b>           | <b>topSNP</b> | <b>p_eQTL</b> | <b>p_SMR</b> | <b>p_HEIDI</b> | <b>adjp_SMR</b> |
|-----------------------|---------------|---------------|--------------|----------------|-----------------|
| <i>RRP9</i>           | rs13072536    | 2.23E-02      | 3.48E-02     | NA             | 4.76E-02        |
| <i>RP11-1020A11.2</i> | rs61432137    | 1.72E-02      | 2.90E-02     | NA             | 4.77E-02        |
| <i>GBF1</i>           | rs35525740    | 1.73E-02      | 2.31E-02     | NA             | 4.77E-02        |
| <i>PSD</i>            | rs284858      | 1.18E-02      | 2.31E-02     | NA             | 4.77E-02        |
| <i>AP000662.4</i>     | rs708228      | 2.08E-02      | 3.08E-02     | NA             | 4.78E-02        |
| <i>FOXO3B</i>         | rs9890563     | 1.60E-02      | 3.08E-02     | NA             | 4.78E-02        |
| <i>TSGA10IP</i>       | rs1193851     | 1.68E-02      | 2.84E-02     | NA             | 4.78E-02        |
| <i>DIMT1</i>          | rs10041978    | 2.35E-02      | 3.08E-02     | NA             | 4.78E-02        |
| <i>HMGA1</i>          | rs511515      | 1.45E-02      | 2.52E-02     | NA             | 4.79E-02        |
| <i>RP11-403I13.8</i>  | rs12124898    | 1.48E-02      | 2.51E-02     | NA             | 4.79E-02        |
| <i>RP11-677M14.6</i>  | rs12283429    | 1.61E-02      | 2.50E-02     | NA             | 4.79E-02        |
| <i>ARHGAP1</i>        | rs10838634    | 2.13E-02      | 3.06E-02     | NA             | 4.79E-02        |
| <i>RP11-496B10.3</i>  | rs1805589     | 1.89E-02      | 2.64E-02     | NA             | 4.80E-02        |
| <i>GPN1</i>           | rs12474906    | 1.82E-02      | 3.11E-02     | NA             | 4.80E-02        |
| <i>C14orf180</i>      | rs4906379     | 2.13E-02      | 2.87E-02     | NA             | 4.80E-02        |
| <i>RP11-158M2.3</i>   | rs3803405     | 1.73E-02      | 3.15E-02     | NA             | 4.80E-02        |
| <i>RP11-723D22.3</i>  | rs17435276    | 1.74E-02      | 3.17E-02     | NA             | 4.80E-02        |
| <i>MLLT11</i>         | rs12124898    | 1.96E-02      | 3.09E-02     | NA             | 4.81E-02        |
| <i>AVIL</i>           | rs73115999    | 1.51E-02      | 2.72E-02     | NA             | 4.81E-02        |
| <i>RP11-146F11.5</i>  | rs4583255     | 2.78E-02      | 3.59E-02     | NA             | 4.81E-02        |
| <i>AF131215.2</i>     | rs73191548    | 1.40E-02      | 2.75E-02     | NA             | 4.82E-02        |
| <i>AP006547.3</i>     | rs28460883    | 2.09E-02      | 2.99E-02     | NA             | 4.82E-02        |
| <i>RP11-297M9.2</i>   | rs1420042     | 1.79E-02      | 3.11E-02     | NA             | 4.82E-02        |
| <i>SAG</i>            | rs11535       | 2.57E-02      | 3.24E-02     | NA             | 4.83E-02        |
| <i>TTC12</i>          | rs10750025    | 2.24E-02      | 3.24E-02     | NA             | 4.83E-02        |
| <i>AC109829.1</i>     | rs12474906    | 1.66E-02      | 2.92E-02     | NA             | 4.83E-02        |
| <i>MBLAC2</i>         | rs2247870     | 9.72E-03      | 2.98E-02     | NA             | 4.83E-02        |
| <i>NCAN</i>           | rs8101938     | 1.83E-02      | 2.97E-02     | NA             | 4.83E-02        |
| <i>SIVA1</i>          | rs4906379     | 2.17E-02      | 2.91E-02     | NA             | 4.83E-02        |
| <i>SLC25A40</i>       | rs73210260    | 1.82E-02      | 2.90E-02     | NA             | 4.83E-02        |
| <i>SZT2</i>           | rs3001723     | 2.19E-02      | 3.00E-02     | NA             | 4.83E-02        |
| <i>ATPAF2</i>         | rs2955367     | 1.46E-02      | 3.14E-02     | NA             | 4.84E-02        |
| <i>SLC5A6</i>         | rs12474906    | 1.80E-02      | 3.09E-02     | NA             | 4.84E-02        |
| <i>ARL5B</i>          | rs4748465     | 2.00E-02      | 3.01E-02     | NA             | 4.84E-02        |
| <i>CDC42EP2</i>       | rs1193851     | 1.93E-02      | 3.15E-02     | NA             | 4.85E-02        |
| <i>ST3GAL3</i>        | rs3001723     | 2.32E-02      | 3.15E-02     | NA             | 4.85E-02        |
| <i>FAM222A-AS1</i>    | rs3026445     | 2.00E-02      | 3.12E-02     | NA             | 4.85E-02        |
| <i>AC009245.3</i>     | rs1647181     | 2.19E-02      | 3.17E-02     | NA             | 4.86E-02        |
| <i>BAI1</i>           | rs28460883    | 2.29E-02      | 3.21E-02     | NA             | 4.86E-02        |
| <i>RP11-22L13.1</i>   | rs2477686     | 2.29E-02      | 3.24E-02     | NA             | 4.86E-02        |
| <i>RP11-543P15.1</i>  | rs1016388     | 2.65E-02      | 3.27E-02     | NA             | 4.86E-02        |
| <i>NPTXR</i>          | rs1008677     | 2.12E-02      | 2.87E-02     | NA             | 4.86E-02        |
| <i>PRSS51</i>         | rs73191548    | 1.50E-02      | 2.86E-02     | NA             | 4.86E-02        |

| <b>Gene</b>          | <b>topSNP</b> | <b>p_eQTL</b> | <b>p_SMR</b> | <b>p_HEIDI</b> | <b>adjp_SMR</b> |
|----------------------|---------------|---------------|--------------|----------------|-----------------|
| <i>RP11-261C10.3</i> | rs12751210    | 1.65E-02      | 2.80E-02     | NA             | 4.86E-02        |
| <i>STAMBP</i>        | rs73947808    | 1.66E-02      | 2.73E-02     | NA             | 4.86E-02        |
| <i>ZNF689</i>        | rs4424923     | 1.87E-02      | 2.79E-02     | NA             | 4.86E-02        |
| <i>RPL7P4</i>        | rs3132564     | 2.43E-02      | 3.17E-02     | NA             | 4.86E-02        |
| <i>CTD-2012K14.7</i> | rs1971546     | 1.91E-02      | 3.14E-02     | NA             | 4.87E-02        |
| <i>RP11-499E18.1</i> | rs13107325    | 1.93E-02      | 2.43E-02     | NA             | 4.87E-02        |
| <i>OS9</i>           | rs73115999    | 1.41E-02      | 2.59E-02     | NA             | 4.87E-02        |
| <i>PEX16</i>         | rs10838634    | 2.27E-02      | 3.22E-02     | NA             | 4.87E-02        |
| <i>ST14</i>          | rs4936123     | 1.96E-02      | 3.24E-02     | NA             | 4.88E-02        |
| <i>IL17RC</i>        | rs61432137    | 2.08E-02      | 3.32E-02     | NA             | 4.89E-02        |
| <i>MFHAS1</i>        | rs2948286     | 1.05E-02      | 2.66E-02     | NA             | 4.89E-02        |
| <i>FBXL19-AS1</i>    | rs4583255     | 2.22E-02      | 2.98E-02     | NA             | 4.90E-02        |
| <i>EDC4</i>          | rs7187202     | 2.00E-02      | 3.27E-02     | NA             | 4.91E-02        |
| <i>FOSL2</i>         | rs4666014     | 1.69E-02      | 3.29E-02     | NA             | 4.91E-02        |
| <i>NUCB1</i>         | rs7047        | 2.36E-02      | 3.29E-02     | NA             | 4.91E-02        |
| <i>RP4-564F22.5</i>  | rs6093097     | 2.62E-02      | 3.28E-02     | NA             | 4.91E-02        |
| <i>FES</i>           | rs4702        | 1.93E-02      | 2.65E-02     | NA             | 4.91E-02        |
| <i>FCGR1C</i>        | rs72694957    | 2.17E-02      | 3.18E-02     | NA             | 4.91E-02        |
| <i>EIF4EBP1</i>      | rs9198        | 2.23E-02      | 3.28E-02     | NA             | 4.91E-02        |
| <i>JRK</i>           | rs7462788     | 2.57E-02      | 3.28E-02     | NA             | 4.91E-02        |
| <i>PRKCD</i>         | rs13072536    | 2.07E-02      | 3.29E-02     | NA             | 4.91E-02        |
| <i>RP11-567M21.3</i> | rs4936123     | 2.02E-02      | 3.31E-02     | NA             | 4.91E-02        |
| <i>C16orf92</i>      | rs4424923     | 2.23E-02      | 3.20E-02     | NA             | 4.92E-02        |
| <i>INTS1</i>         | rs1476887     | 2.19E-02      | 2.81E-02     | NA             | 4.93E-02        |
| <i>NSUN6</i>         | rs1409203     | 2.37E-02      | 3.35E-02     | NA             | 4.93E-02        |
| <i>DDB2</i>          | rs10838634    | 2.52E-02      | 3.50E-02     | NA             | 4.94E-02        |
| <i>EIF1AD</i>        | rs1193851     | 2.10E-02      | 3.35E-02     | NA             | 4.95E-02        |
| <i>IPO13</i>         | rs3001723     | 2.50E-02      | 3.34E-02     | NA             | 4.95E-02        |
| <i>GIN1</i>          | rs1823694     | 1.51E-02      | 3.03E-02     | NA             | 4.95E-02        |
| <i>IL20RB</i>        | rs9845788     | 1.99E-02      | 3.08E-02     | NA             | 4.95E-02        |
| <i>REXO2</i>         | rs10736470    | 2.06E-02      | 3.03E-02     | NA             | 4.95E-02        |
| <i>RP11-619L19.2</i> | rs784255      | 2.27E-02      | 3.08E-02     | NA             | 4.95E-02        |
| <i>GYLTL1B</i>       | rs10838634    | 2.54E-02      | 3.52E-02     | NA             | 4.96E-02        |
| <i>ZNF710</i>        | rs35346340    | 2.43E-02      | 3.53E-02     | NA             | 4.96E-02        |
| <i>PDE4D</i>         | rs4604142     | 2.47E-02      | 3.13E-02     | NA             | 4.96E-02        |
| <i>RP11-375N15.2</i> | rs73191548    | 1.74E-02      | 3.17E-02     | NA             | 4.96E-02        |
| <i>RPL35P2</i>       | rs511515      | 1.95E-02      | 3.12E-02     | NA             | 4.96E-02        |
| <i>RP11-234N17.1</i> | rs1702294     | 2.91E-02      | 3.43E-02     | NA             | 4.96E-02        |
| <i>AC078842.3</i>    | rs3735025     | 2.53E-02      | 3.44E-02     | NA             | 4.96E-02        |
| <i>BLM</i>           | rs6227        | 1.54E-02      | 2.44E-02     | NA             | 4.96E-02        |
| <i>HNRNPA1P9</i>     | rs76349903    | 1.44E-02      | 2.44E-02     | NA             | 4.96E-02        |
| <i>SNX7</i>          | rs9662719     | 2.28E-02      | 3.19E-02     | NA             | 4.96E-02        |
| <i>ZNF771</i>        | rs4788211     | 2.08E-02      | 3.19E-02     | NA             | 4.96E-02        |



| <b>Gene</b>         | <b>topSNP</b> | <b>p_eQTL</b> | <b>p_SMR</b> | <b>p_HEIDI</b> | <b>adjp_SMR</b> |
|---------------------|---------------|---------------|--------------|----------------|-----------------|
| <i>AL590822.1</i>   | rs2494631     | 2.15E-02      | 3.10E-02     | NA             | 4.96E-02        |
| <i>BHLHA9</i>       | rs216176      | 2.07E-02      | 3.14E-02     | NA             | 4.96E-02        |
| <i>CASP10</i>       | rs6708345     | 1.98E-02      | 3.14E-02     | NA             | 4.96E-02        |
| <i>PEX10</i>        | rs10797426    | 2.24E-02      | 3.15E-02     | NA             | 4.96E-02        |
| <i>CTNNA1</i>       | rs187653      | 1.68E-02      | 2.72E-02     | NA             | 4.97E-02        |
| <i>SCML4</i>        | rs9400240     | 2.04E-02      | 3.77E-02     | NA             | 4.98E-02        |
| <i>CEP170B</i>      | rs10132641    | 2.36E-02      | 3.24E-02     | NA             | 4.98E-02        |
| <i>CTXN3</i>        | rs2764766     | 1.44E-02      | 3.25E-02     | NA             | 4.98E-02        |
| <i>ATG7</i>         | rs61432137    | 2.15E-02      | 3.41E-02     | NA             | 4.99E-02        |
| <i>RP11-675F6.4</i> | rs9198        | 2.32E-02      | 3.39E-02     | NA             | 4.99E-02        |
| <i>RP11-3P17.4</i>  | rs536964      | 2.14E-02      | 3.31E-02     | NA             | 5.00E-02        |
| <i>RP6-91H8.5</i>   | rs2332704     | 2.20E-02      | 3.32E-02     | NA             | 5.00E-02        |

(3) The most significant eQTL analyses results in brain from CMC.

| <b>Gene</b>     | <b>SNP</b>  | <b>P_value</b> |
|-----------------|-------------|----------------|
| <i>AC103965</i> | rs11630887  | <0.01          |
| <i>AL022393</i> | rs111770007 | <0.01          |
| <i>ALMS1P</i>   | rs11903916  | <0.01          |
| <i>ALMS1</i>    | rs11903916  | <0.01          |
| <i>AP3B2</i>    | rs1145173   | <0.01          |
| <i>ARL3</i>     | rs10786701  | <0.01          |
| <i>AS3MT</i>    | rs10883842  | <0.01          |
| <i>ATP6V0D1</i> | rs1971546   | <0.01          |
| <i>ATP6V1G2</i> | rs1265092   | <0.01          |
| <i>BAG4</i>     | rs16887244  | <0.01          |
| <i>BAG6</i>     | rs433061    | <0.01          |
| <i>BAK1</i>     | rs210142    | <0.01          |
| <i>BRD2</i>     | rs433061    | <0.01          |
| <i>BTN2A1</i>   | rs6940638   | <0.01          |
| <i>BTN3A2</i>   | rs13216828  | <0.01          |
| <i>BTN3A3</i>   | rs2235251   | <0.01          |
| <i>C10orf32</i> | rs10883842  | <0.01          |
| <i>C2orf47</i>  | rs11688168  | <0.01          |
| <i>C2orf82</i>  | rs1083522   | <0.01          |
| <i>C4A</i>      | rs1265092   | <0.01          |
| <i>CD46</i>     | rs12749612  | <0.01          |
| <i>CNNM2</i>    | rs10883842  | <0.01          |
| <i>CNTN4</i>    | rs9845120   | <0.01          |
| <i>CPEB1</i>    | rs1145173   | <0.01          |
| <i>CSDC2</i>    | rs12158335  | <0.01          |
| <i>CSPG4P11</i> | rs11630887  | <0.01          |
| <i>CSPG4P12</i> | rs11630887  | <0.01          |
| <i>CTSS</i>     | rs72694955  | <0.01          |
| <i>DDAH2</i>    | rs433061    | <0.01          |
| <i>DDHD2</i>    | rs11779986  | <0.01          |
| <i>DNM1P51</i>  | rs57489559  | <0.01          |
| <i>DOC2A</i>    | rs11644809  | <0.01          |
| <i>DRG2</i>     | rs11078410  | <0.01          |
| <i>EFTUD1P1</i> | rs11630887  | <0.01          |
| <i>ELOVL7</i>   | rs10041978  | <0.01          |
| <i>ERI1</i>     | rs2948286   | <0.01          |
| <i>F8</i>       | rs2266886   | <0.01          |
| <i>FAM109B</i>  | rs133382    | <0.01          |
| <i>FAM154B</i>  | rs4779046   | <0.01          |
| <i>FAM66A</i>   | rs2948286   | <0.01          |
| <i>FAM66D</i>   | rs2948286   | <0.01          |

| <b>Gene</b>      | <b>SNP</b> | <b>P_value</b> |
|------------------|------------|----------------|
| <i>FAM86B3P</i>  | rs2948286  | <0.01          |
| <i>FANCL</i>     | rs11688767 | <0.01          |
| <i>FES</i>       | rs11372849 | <0.01          |
| <i>FTCDNL1</i>   | rs11333159 | <0.01          |
| <i>FTSJ2</i>     | rs12699453 | <0.01          |
| <i>FURIN</i>     | rs11372849 | <0.01          |
| <i>GATAD2A</i>   | rs10282    | <0.01          |
| <i>GLT8D1</i>    | rs11717383 | <0.01          |
| <i>GLYCTK</i>    | rs11717383 | <0.01          |
| <i>GOLGA6L4</i>  | rs11630887 | <0.01          |
| <i>GUSBP2</i>    | rs6932590  | <0.01          |
| <i>HIST1H2BC</i> | rs198811   | <0.01          |
| <i>HIST1H4B</i>  | rs198811   | <0.01          |
| <i>HLA-B</i>     | rs1131156  | <0.01          |
| <i>HLA-C</i>     | rs34546986 | <0.01          |
| <i>HLA-DMA</i>   | rs433061   | <0.01          |
| <i>HLA-DQA1</i>  | rs1048645  | <0.01          |
| <i>HLA-DRB1</i>  | rs9270358  | <0.01          |
| <i>HSPA1L</i>    | rs2075800  | <0.01          |
| <i>INO80E</i>    | rs11644809 | <0.01          |
| <i>IP6K3</i>     | rs2395401  | <0.01          |
| <i>IRAK1</i>     | rs2266886  | <0.01          |
| <i>KLC1</i>      | rs10132641 | <0.01          |
| <i>LINC00634</i> | rs133382   | <0.01          |
| <i>MAN2A1</i>    | rs2249413  | <0.01          |
| <i>MAPK3</i>     | rs11644809 | <0.01          |
| <i>MAU2</i>      | rs13964    | <0.01          |
| <i>MDK</i>       | rs11038906 | <0.01          |
| <i>MED8</i>      | rs3001723  | <0.01          |
| <i>MICA</i>      | rs2534675  | <0.01          |
| <i>NAGA</i>      | rs12158335 | <0.01          |
| <i>NEK4</i>      | rs1029871  | <0.01          |
| <i>NOTCH4</i>    | rs2534675  | <0.01          |
| <i>NT5C2</i>     | rs11191560 | <0.01          |
| <i>OGFOD2</i>    | rs10846491 | <0.01          |
| <i>PCCB</i>      | rs7349597  | <0.01          |
| <i>PGBD1</i>     | rs1150670  | <0.01          |
| <i>PLXNA3</i>    | rs2266886  | <0.01          |
| <i>POLR3H</i>    | rs1894713  | <0.01          |
| <i>PPM1M</i>     | rs4687680  | <0.01          |
| <i>PPP1R13B</i>  | rs10132641 | <0.01          |
| <i>PRMT7</i>     | rs1971546  | <0.01          |
| <i>REEP2</i>     | rs16373    | <0.01          |

| <b>Gene</b>        | <b>SNP</b>  | <b>P_value</b> |
|--------------------|-------------|----------------|
| <i>RFT1</i>        | rs7620706   | <0.01          |
| <i>RP11-18114</i>  | rs10786701  | <0.01          |
| <i>RP11-275H4</i>  | rs16832165  | <0.01          |
| <i>RP11-347C12</i> | rs11644809  | <0.01          |
| <i>RP11-490G2</i>  | rs12072739  | <0.01          |
| <i>RP11-586K2</i>  | rs10955542  | <0.01          |
| <i>RP11-677M14</i> | rs36053597  | <0.01          |
| <i>RP11-890B15</i> | rs11600182  | <0.01          |
| <i>RP1-265C24</i>  | rs111770007 | <0.01          |
| <i>RP5-874C20</i>  | rs1150670   | <0.01          |
| <i>RP5-966M1</i>   | rs4687680   | <0.01          |
| <i>SDAD1P1</i>     | rs3808573   | <0.01          |
| <i>SF3B1</i>       | rs10931779  | <0.01          |
| <i>SFMBT1</i>      | rs1961958   | <0.01          |
| <i>SLC45A1</i>     | rs301792    | <0.01          |
| <i>SLCO4C1</i>     | rs1823694   | <0.01          |
| <i>SNX19</i>       | rs10791098  | <0.01          |
| <i>SNX29P2</i>     | rs11644809  | <0.01          |
| <i>SRR</i>         | rs12603592  | <0.01          |
| <i>STAT6</i>       | rs324015    | <0.01          |
| <i>TAP2</i>        | rs433061    | <0.01          |
| <i>TDRD9</i>       | rs10132641  | <0.01          |
| <i>THOC7</i>       | rs7615475   | <0.01          |
| <i>TMEM187</i>     | rs2266886   | <0.01          |
| <i>TMEM219</i>     | rs4583255   | <0.01          |
| <i>TOM1L2</i>      | rs9907287   | <0.01          |
| <i>TRIM35</i>      | rs2565065   | <0.01          |
| <i>TSNARE1</i>     | rs28460883  | <0.01          |
| <i>TYW5</i>        | rs11333159  | <0.01          |
| <i>UBE2Q2P1</i>    | rs57489559  | <0.01          |
| <i>VAR2</i>        | rs1265092   | <0.01          |
| <i>WBP1L</i>       | rs10883842  | <0.01          |
| <i>WBP2NL</i>      | rs12158335  | <0.01          |
| <i>WHSC1L1</i>     | rs11779986  | <0.01          |
| <i>XPNPEP3</i>     | rs9611469   | <0.01          |
| <i>ZKSCAN3</i>     | rs1150670   | <0.01          |
| <i>ZKSCAN8</i>     | rs2275508   | <0.01          |
| <i>ZNF165</i>      | rs1150670   | <0.01          |
| <i>ZNF192P1</i>    | rs111770007 | <0.01          |
| <i>ZNF259P1</i>    | rs13217795  | <0.01          |
| <i>ZSCAN16</i>     | rs111770007 | <0.01          |
| <i>ZSCAN23</i>     | rs111770007 | <0.01          |
| <i>ZSCAN31</i>     | rs111770007 | <0.01          |

| <b>Gene</b> | <b>SNP</b> | <b>P_value</b> |
|-------------|------------|----------------|
| ZSCAN9      | rs1150670  | <0.01          |
| AC005477    | rs2332703  | <0.05          |
| AC007163    | rs281771   | <0.05          |
| ACTR1A      | rs3834416  | <0.05          |
| ACTR5       | rs2244937  | <0.05          |
| ANAPC7      | rs3026445  | <0.05          |
| BTBD1       | rs4779046  | <0.05          |
| BTN2A2      | rs2072803  | <0.05          |
| CPT1C       | rs57940349 | <0.05          |
| CTNNA1      | rs154069   | <0.05          |
| DHX35       | rs208818   | <0.05          |
| ERCC8       | rs10041978 | <0.05          |
| FAM167A     | rs2948286  | <0.05          |
| FCGRT       | rs57940349 | <0.05          |
| HIST1H4F    | rs198811   | <0.05          |
| HLA-E       | rs1265092  | <0.05          |
| HYAL3       | rs9852677  | <0.05          |
| IMMP2L      | rs37716    | <0.05          |
| INA         | rs11191560 | <0.05          |
| KMT2E       | rs10281886 | <0.05          |
| L3MBTL2     | rs5758268  | <0.05          |
| LY6G5B      | rs433061   | <0.05          |
| MARK3       | rs12147596 | <0.05          |
| MPHOSPH9    | rs1051434  | <0.05          |
| NISCH       | rs1961958  | <0.05          |
| NMB         | rs1051168  | <0.05          |
| PACSN3      | rs10838634 | <0.05          |
| PJA1        | rs5937159  | <0.05          |
| PLCL1       | rs4389332  | <0.05          |
| PPT2        | rs72849267 | <0.05          |
| PSMG3       | rs12531315 | <0.05          |
| RAB27B      | rs12327270 | <0.05          |
| RERE        | rs159962   | <0.05          |
| RP4-756G23  | rs5758268  | <0.05          |
| SDCCAG8     | rs10803138 | <0.05          |
| SETD8       | rs3759115  | <0.05          |
| SNRNP70     | rs57940349 | <0.05          |
| STAR        | rs1488936  | <0.05          |
| TARS2       | rs35132383 | <0.05          |
| TMEM110     | rs7620706  | <0.05          |
| VPS29       | rs11065628 | <0.05          |
| VSTM2L      | rs208818   | <0.05          |
| WDR73       | rs11630887 | <0.05          |

| <b>Gene</b>    | <b>SNP</b>  | <b>P_value</b> |
|----------------|-------------|----------------|
| <i>YJEFN3</i>  | rs1054930   | <0.05          |
| <i>ZKSCAN4</i> | rs213238    | <0.05          |
| <i>ZNF14</i>   | rs1469712   | <0.05          |
| <i>ZNF204P</i> | rs111770007 | <0.05          |
| <i>ZSCAN2</i>  | rs11630887  | <0.05          |

## (4) The most significant eQTL analyses results in blood from NG.

| <b>Gene</b>              | <b>SNP</b> | <b>P_value</b> | <b>FDR</b> |
|--------------------------|------------|----------------|------------|
| <i>AC013264.2</i>        | rs10199410 | 3.27E-310      | 0.00E+00   |
| <i>BAK1</i>              | rs511515   | 3.27E-310      | 0.00E+00   |
| <i>BTN3A2</i>            | rs12176317 | 3.27E-310      | 0.00E+00   |
| <i>C22orf32</i>          | rs12157344 | 3.27E-310      | 0.00E+00   |
| <i>C2</i>                | rs12157344 | 3.27E-310      | 0.00E+00   |
| <i>F2</i>                | rs9274563  | 3.27E-310      | 0.00E+00   |
| <i>HLA-DQB1-AS1</i>      | rs9274563  | 3.27E-310      | 0.00E+00   |
| <i>HLA-DQB1</i>          | rs9274563  | 3.27E-310      | 0.00E+00   |
| <i>HLA-DRB5</i>          | rs9271877  | 3.27E-310      | 0.00E+00   |
| <i>HLA-DRB6</i>          | rs9269874  | 3.27E-310      | 0.00E+00   |
| <i>HLA-DRB9</i>          | rs9269874  | 3.27E-310      | 0.00E+00   |
| <i>ITIH4</i>             | rs4687663  | 3.27E-310      | 0.00E+00   |
| <i>MUSTN1</i>            | rs4687663  | 3.27E-310      | 0.00E+00   |
| <i>SNX19</i>             | rs2276097  | 3.27E-310      | 0.00E+00   |
| <i>XXbac-BPG254F23.6</i> | rs9274563  | 3.27E-310      | 0.00E+00   |
| <i>ZFP57</i>             | rs3117289  | 3.27E-310      | 0.00E+00   |
| <i>HLA-DQA1</i>          | rs9274563  | 3.16E-301      | 0.00E+00   |
| <i>CYP2D6</i>            | rs5751220  | 2.79E-281      | 0.00E+00   |
| <i>GPN3</i>              | rs11065647 | 2.93E-271      | 0.00E+00   |
| <i>ANKRD44</i>           | rs10931779 | 5.89E-255      | 0.00E+00   |
| <i>RP11-890B15.3</i>     | rs2276097  | 6.88E-246      | 0.00E+00   |
| <i>HLA-DQB2</i>          | rs9269874  | 1.28E-225      | 0.00E+00   |
| <i>AS3MT</i>             | rs284863   | 7.23E-223      | 0.00E+00   |
| <i>HLA-F-AS1</i>         | rs3129055  | 3.65E-212      | 0.00E+00   |
| <i>HLA-F</i>             | rs3129055  | 3.65E-212      | 0.00E+00   |
| <i>DUS2L</i>             | rs2418736  | 1.75E-207      | 0.00E+00   |
| <i>ITIH4-AS1</i>         | rs4687663  | 4.14E-204      | 0.00E+00   |
| <i>HLA-S</i>             | rs1005598  | 2.31E-202      | 0.00E+00   |
| <i>HLA-DQA2</i>          | rs9269874  | 1.75E-176      | 0.00E+00   |
| <i>TMTC1</i>             | rs302317   | 3.69E-173      | 0.00E+00   |
| <i>XRCC3</i>             | rs1799796  | 7.99E-168      | 0.00E+00   |
| <i>HLA-C</i>             | rs17197637 | 2.08E-164      | 0.00E+00   |
| <i>KLC1</i>              | rs11846404 | 7.72E-160      | 0.00E+00   |
| <i>HCG4P5</i>            | rs2571385  | 4.46E-155      | 0.00E+00   |
| <i>HCG4</i>              | rs2571385  | 4.46E-155      | 0.00E+00   |
| <i>HLA-A</i>             | rs2571385  | 4.46E-155      | 0.00E+00   |
| <i>NT5DC2</i>            | rs13076193 | 6.79E-155      | 0.00E+00   |
| <i>HLA-DRB1</i>          | rs9275109  | 6.30E-146      | 0.00E+00   |
| <i>PSMB9</i>             | rs9276905  | 7.07E-145      | 0.00E+00   |
| <i>RPL23AP1</i>          | rs885945   | 2.81E-135      | 0.00E+00   |
| <i>FAM109B</i>           | rs133379   | 5.48E-135      | 0.00E+00   |

| <b>Gene</b>          | <b>SNP</b>  | <b>P_value</b> | <b>FDR</b> |
|----------------------|-------------|----------------|------------|
| <i>MAPK3</i>         | rs4424923   | 3.54E-133      | 0.00E+00   |
| <i>ABCB9</i>         | rs883562    | 2.31E-132      | 0.00E+00   |
| <i>SREBF1</i>        | rs11078400  | 7.56E-132      | 0.00E+00   |
| <i>GLYCTK</i>        | rs2276834   | 2.36E-130      | 0.00E+00   |
| <i>LPAR2</i>         | rs7249692   | 9.85E-130      | 0.00E+00   |
| <i>INO80E</i>        | rs4788197   | 7.59E-119      | 0.00E+00   |
| <i>C10orf32</i>      | rs284863    | 9.40E-119      | 0.00E+00   |
| <i>NT5C2</i>         | rs11191560  | 1.57E-117      | 0.00E+00   |
| <i>HLA-J</i>         | rs1655905   | 1.29E-116      | 0.00E+00   |
| <i>ZNRD1-AS1</i>     | rs1655905   | 1.29E-116      | 0.00E+00   |
| <i>ZNRD1</i>         | rs1655905   | 1.29E-116      | 0.00E+00   |
| <i>LINC00243</i>     | rs886424    | 1.85E-115      | 0.00E+00   |
| <i>GLYCTK-AS1</i>    | rs2276834   | 6.68E-114      | 0.00E+00   |
| <i>MIR135A1</i>      | rs2276834   | 6.68E-114      | 0.00E+00   |
| <i>HCG27</i>         | rs4713446   | 4.75E-112      | 0.00E+00   |
| <i>RP11-73M18.10</i> | rs3212090   | 2.93E-110      | 0.00E+00   |
| <i>RP11-73M18.7</i>  | rs3212090   | 2.93E-110      | 0.00E+00   |
| <i>CCDC134</i>       | rs9607850   | 2.49E-108      | 0.00E+00   |
| <i>HMGNA4</i>        | rs2073526   | 9.75E-105      | 0.00E+00   |
| <i>TRIM27</i>        | rs209174    | 2.28E-104      | 0.00E+00   |
| <i>ACTR5</i>         | rs1006945   | 2.45E-104      | 0.00E+00   |
| <i>HLA-U</i>         | rs2571385   | 2.73E-104      | 0.00E+00   |
| <i>NAGA</i>          | rs133379    | 1.12E-102      | 0.00E+00   |
| <i>WBP2NL</i>        | rs133379    | 1.12E-102      | 0.00E+00   |
| <i>RP11-73M18.8</i>  | rs11846404  | 4.19E-101      | 0.00E+00   |
| <i>HLA-G</i>         | rs3132690   | 3.23E-99       | 0.00E+00   |
| <i>LY6G5C</i>        | rs805303    | 2.73E-98       | 0.00E+00   |
| <i>RP11-67A1.2</i>   | rs11864819  | 2.74E-96       | 0.00E+00   |
| <i>FES</i>           | rs35346340  | 7.95E-96       | 0.00E+00   |
| <i>CYP21A2</i>       | rs519417    | 1.61E-89       | 0.00E+00   |
| <i>SETD8</i>         | rs2337631   | 5.47E-86       | 0.00E+00   |
| <i>HLA-K</i>         | rs3132690   | 3.07E-85       | 0.00E+00   |
| <i>ALMS1P</i>        | rs11903916  | 3.53E-82       | 0.00E+00   |
| <i>ALMS1</i>         | rs11903916  | 3.53E-82       | 0.00E+00   |
| <i>PPM1M</i>         | rs11717383  | 8.11E-82       | 0.00E+00   |
| <i>TCF19</i>         | rs114475699 | 4.11E-80       | 0.00E+00   |
| <i>AKAP10</i>        | rs72843506  | 4.78E-79       | 0.00E+00   |
| <i>PLCL1</i>         | rs10207232  | 5.93E-79       | 0.00E+00   |
| <i>GDPD3</i>         | rs4424923   | 6.69E-79       | 0.00E+00   |
| <i>HLA-L</i>         | rs3132619   | 4.99E-77       | 0.00E+00   |
| <i>RP5-874C20.3</i>  | rs1225715   | 1.51E-76       | 0.00E+00   |
| <i>PCCB</i>          | rs7349597   | 2.47E-75       | 0.00E+00   |
| <i>PSORS1C3</i>      | rs9380224   | 1.66E-73       | 0.00E+00   |



| <b>Gene</b>          | <b>SNP</b>  | <b>P_value</b> | <b>FDR</b> |
|----------------------|-------------|----------------|------------|
| <i>RP5-821D11.7</i>  | rs9607850   | 2.45E-73       | 0.00E+00   |
| <i>SREBF2</i>        | rs9607850   | 2.45E-73       | 0.00E+00   |
| <i>FAM216A</i>       | rs11065647  | 1.17E-72       | 0.00E+00   |
| <i>RP11-478C19.5</i> | rs11065647  | 1.17E-72       | 0.00E+00   |
| <i>POU5F1</i>        | rs114475699 | 2.81E-70       | 0.00E+00   |
| <i>IER3</i>          | rs886424    | 2.24E-68       | 0.00E+00   |
| <i>CCHCR1</i>        | rs130076    | 5.46E-68       | 0.00E+00   |
| <i>VARS2</i>         | rs1632855   | 6.28E-68       | 0.00E+00   |
| <i>GATAD2A</i>       | rs2905432   | 1.34E-65       | 0.00E+00   |
| <i>CDK2AP1</i>       | rs12817892  | 1.61E-65       | 0.00E+00   |
| <i>RP11-282O18.3</i> | rs4759415   | 4.04E-65       | 0.00E+00   |
| <i>TMX2</i>          | rs682503    | 2.27E-64       | 0.00E+00   |
| <i>NMB</i>           | rs11636189  | 1.84E-62       | 0.00E+00   |
| <i>PRSS16</i>        | rs61240102  | 3.55E-62       | 0.00E+00   |
| <i>MOG</i>           | rs3117289   | 1.08E-61       | 0.00E+00   |
| <i>TRIM38</i>        | rs34043431  | 3.55E-61       | 0.00E+00   |
| <i>BTN2A2</i>        | rs4711107   | 5.16E-61       | 0.00E+00   |
| <i>PRMT7</i>         | rs1971546   | 1.37E-60       | 0.00E+00   |
| <i>YPEL3</i>         | rs4788198   | 2.86E-60       | 0.00E+00   |
| <i>HLA-DPB2</i>      | rs114132738 | 4.21E-60       | 0.00E+00   |
| <i>GOLGA6L4</i>      | rs220333    | 8.38E-60       | 0.00E+00   |
| <i>ZKSCAN4</i>       | rs735765    | 1.39E-59       | 0.00E+00   |
| <i>LRRFIP2</i>       | rs6769400   | 7.72E-59       | 0.00E+00   |
| <i>ITIH3</i>         | rs2710339   | 1.21E-58       | 0.00E+00   |
| <i>CYP2D8P1</i>      | rs12157344  | 6.24E-58       | 0.00E+00   |
| <i>TMEM180</i>       | rs3934495   | 1.38E-57       | 0.00E+00   |
| <i>RP5-1157M23.2</i> | rs7629072   | 2.19E-57       | 0.00E+00   |
| <i>ANP32E</i>        | rs12124898  | 2.38E-57       | 0.00E+00   |
| <i>FLOT1</i>         | rs886424    | 1.14E-56       | 0.00E+00   |
| <i>IGSF9B</i>        | rs73034295  | 1.81E-55       | 0.00E+00   |
| <i>TBX6</i>          | rs4424923   | 3.20E-55       | 0.00E+00   |
| <i>ZSCAN12P1</i>     | rs2275508   | 1.35E-53       | 0.00E+00   |
| <i>RP11-325F22.2</i> | rs6466030   | 2.80E-52       | 0.00E+00   |
| <i>MED19</i>         | rs682503    | 3.35E-52       | 0.00E+00   |
| <i>MUC22</i>         | rs114475699 | 3.57E-52       | 0.00E+00   |
| <i>HCG4P6</i>        | rs3129012   | 5.92E-52       | 0.00E+00   |
| <i>ARL6IP4</i>       | rs1727295   | 1.86E-51       | 0.00E+00   |
| <i>RP11-197N18.2</i> | rs1727295   | 1.86E-51       | 0.00E+00   |
| <i>TNXB</i>          | rs2280774   | 2.17E-50       | 0.00E+00   |
| <i>TNXA</i>          | rs389883    | 5.71E-50       | 0.00E+00   |
| <i>PSORS1C1</i>      | rs9264587   | 8.60E-50       | 0.00E+00   |
| <i>PSORS1C2</i>      | rs9264587   | 8.60E-50       | 0.00E+00   |
| <i>RP11-458I7.4</i>  | rs72694957  | 2.32E-48       | 0.00E+00   |

| <b>Gene</b>           | <b>SNP</b>  | <b>P_value</b> | <b>FDR</b> |
|-----------------------|-------------|----------------|------------|
| <i>C4B</i>            | rs2280774   | 2.94E-48       | 0.00E+00   |
| <i>MIR1307</i>        | rs113278154 | 1.06E-47       | 0.00E+00   |
| <i>USMG5</i>          | rs113278154 | 1.06E-47       | 0.00E+00   |
| <i>RP11-332O19.3</i>  | rs11191560  | 1.59E-47       | 0.00E+00   |
| <i>DPEP3</i>          | rs7204208   | 2.16E-47       | 0.00E+00   |
| <i>RAD9B</i>          | rs3026445   | 4.35E-47       | 0.00E+00   |
| <i>SRR</i>            | rs216199    | 2.46E-45       | 0.00E+00   |
| <i>HLA-V</i>          | rs2571385   | 3.62E-44       | 0.00E+00   |
| <i>DDHD2</i>          | rs2306899   | 4.14E-44       | 0.00E+00   |
| <i>TMEM110-MUSTN1</i> | rs9836499   | 9.26E-44       | 0.00E+00   |
| <i>TMEM110</i>        | rs9836499   | 9.26E-44       | 0.00E+00   |
| <i>ZDHHC5</i>         | rs682503    | 1.04E-43       | 0.00E+00   |
| <i>FTSJ2</i>          | rs3778996   | 1.83E-43       | 0.00E+00   |
| <i>VPS29</i>          | rs3026445   | 6.75E-43       | 0.00E+00   |
| <i>DAXX</i>           | rs3135406   | 1.67E-42       | 0.00E+00   |
| <i>TSNARE1</i>        | rs72687376  | 4.65E-42       | 0.00E+00   |
| <i>U1</i>             | rs9269874   | 1.20E-41       | 0.00E+00   |
| <i>GOLGA6L5</i>       | rs220333    | 1.20E-41       | 0.00E+00   |
| <i>ZBTB22</i>         | rs3135406   | 1.33E-41       | 0.00E+00   |
| <i>SLC7A6OS</i>       | rs6499160   | 1.75E-41       | 0.00E+00   |
| <i>SLC7A6</i>         | rs6499160   | 1.75E-41       | 0.00E+00   |
| <i>HCG9</i>           | rs1611350   | 2.83E-41       | 0.00E+00   |
| <i>ZSCAN9</i>         | rs1225715   | 3.12E-41       | 0.00E+00   |
| <i>C4A</i>            | rs519417    | 1.82E-40       | 0.00E+00   |
| <i>SPECC1</i>         | rs72843506  | 3.70E-40       | 0.00E+00   |
| <i>ZSCAN2</i>         | rs11631921  | 1.95E-39       | 0.00E+00   |
| <i>TAP2</i>           | rs9271562   | 3.70E-39       | 0.00E+00   |
| <i>DOC2A</i>          | rs4788198   | 8.52E-39       | 0.00E+00   |
| <i>HLA-B</i>          | rs2394885   | 9.79E-39       | 0.00E+00   |
| <i>HLA-DMA</i>        | rs116131925 | 1.01E-38       | 0.00E+00   |
| <i>HLA-DMB</i>        | rs116131925 | 1.01E-38       | 0.00E+00   |
| <i>AL645922.1</i>     | rs389883    | 1.08E-38       | 0.00E+00   |
| <i>CYP21A1P</i>       | rs389883    | 1.08E-38       | 0.00E+00   |
| <i>NDRG4</i>          | rs113571835 | 1.44E-38       | 0.00E+00   |
| <i>BAG5</i>           | rs4906336   | 1.70E-38       | 0.00E+00   |
| <i>NAB2</i>           | rs324017    | 1.87E-38       | 0.00E+00   |
| <i>STAT6</i>          | rs324017    | 1.87E-38       | 0.00E+00   |
| <i>MPHOSPH9</i>       | rs7304782   | 2.27E-38       | 0.00E+00   |
| <i>Z83851.3</i>       | rs134869    | 1.43E-37       | 0.00E+00   |
| <i>DDX39BP2</i>       | rs1632910   | 1.47E-37       | 0.00E+00   |
| <i>DDX39B</i>         | rs1632910   | 1.47E-37       | 0.00E+00   |
| <i>C4B-AS1</i>        | rs2280774   | 1.55E-37       | 0.00E+00   |
| <i>C4A-AS1</i>        | rs2280774   | 2.28E-37       | 0.00E+00   |

| <b>Gene</b>              | <b>SNP</b>  | <b>P_value</b> | <b>FDR</b> |
|--------------------------|-------------|----------------|------------|
| <i>SKIV2L</i>            | rs389883    | 7.54E-37       | 0.00E+00   |
| <i>RERE</i>              | rs301792    | 1.99E-36       | 0.00E+00   |
| <i>MAD1L1</i>            | rs6975354   | 3.43E-36       | 0.00E+00   |
| <i>ATPAF2</i>            | rs7219320   | 4.65E-36       | 0.00E+00   |
| <i>BTN2A1</i>            | rs2273558   | 7.45E-36       | 0.00E+00   |
| <i>NDUFA13</i>           | rs2916068   | 2.15E-35       | 0.00E+00   |
| <i>TSSK6</i>             | rs2916068   | 2.15E-35       | 0.00E+00   |
| <i>YJEFN3</i>            | rs2916068   | 2.15E-35       | 0.00E+00   |
| <i>MEI1</i>              | rs9620001   | 1.39E-34       | 0.00E+00   |
| <i>TOM1L2</i>            | rs11078400  | 5.86E-34       | 0.00E+00   |
| <i>LCAT</i>              | rs56303487  | 1.18E-33       | 0.00E+00   |
| <i>HIST1H4H</i>          | rs9358914   | 2.29E-33       | 0.00E+00   |
| <i>SDAD1P1</i>           | rs3808573   | 2.62E-33       | 0.00E+00   |
| <i>SERBP1P3</i>          | rs7638524   | 2.89E-33       | 0.00E+00   |
| <i>DDAH2</i>             | rs622871    | 3.43E-33       | 0.00E+00   |
| <i>RP1-265C24.5</i>      | rs2275508   | 4.99E-33       | 0.00E+00   |
| <i>MICC</i>              | rs3132619   | 9.00E-33       | 0.00E+00   |
| <i>OR1F12</i>            | rs2275508   | 1.36E-32       | 0.00E+00   |
| <i>C6orf48</i>           | rs805303    | 1.99E-32       | 0.00E+00   |
| <i>SNORD52</i>           | rs805303    | 1.99E-32       | 0.00E+00   |
| <i>DESI1</i>             | rs9607850   | 3.06E-32       | 0.00E+00   |
| <i>TAPBP</i>             | rs3135406   | 8.24E-32       | 0.00E+00   |
| <i>BRD2</i>              | rs209474    | 1.85E-31       | 0.00E+00   |
| <i>XXbac-BPG181M17.6</i> | rs209474    | 1.85E-31       | 0.00E+00   |
| <i>CYP2D7P1</i>          | rs6002597   | 3.19E-31       | 0.00E+00   |
| <i>CSNK2B</i>            | rs805303    | 3.23E-31       | 0.00E+00   |
| <i>LY6G5B</i>            | rs805303    | 3.23E-31       | 0.00E+00   |
| <i>PGBD1</i>             | rs34130214  | 3.47E-31       | 0.00E+00   |
| <i>HLA-H</i>             | rs1655905   | 6.13E-31       | 0.00E+00   |
| <i>SFXN2</i>             | rs4147157   | 6.46E-31       | 0.00E+00   |
| <i>HLA-DPA3</i>          | rs114132738 | 7.18E-31       | 0.00E+00   |
| <i>PRRC2A</i>            | rs2736176   | 1.33E-30       | 0.00E+00   |
| <i>HCG18</i>             | rs3094064   | 2.44E-30       | 0.00E+00   |
| <i>RP11-18I14.7</i>      | rs2031604   | 4.22E-30       | 0.00E+00   |
| <i>BTN3A1</i>            | rs3208733   | 3.36E-29       | 0.00E+00   |
| <i>MARK3</i>             | rs12890820  | 3.52E-29       | 0.00E+00   |
| <i>RP11-259P6.1</i>      | rs73034295  | 3.60E-29       | 0.00E+00   |
| <i>CYP17A1-AS1</i>       | rs284863    | 2.02E-28       | 0.00E+00   |
| <i>CYP17A1</i>           | rs284863    | 2.02E-28       | 0.00E+00   |
| <i>ZKSCAN3</i>           | rs9468368   | 2.82E-28       | 0.00E+00   |
| <i>BTN2A3P</i>           | rs12176317  | 1.02E-27       | 0.00E+00   |
| <i>MAU2</i>              | rs62135552  | 1.12E-27       | 0.00E+00   |
| <i>AGER</i>              | rs204994    | 3.91E-27       | 0.00E+00   |

| <b>Gene</b>               | <b>SNP</b>  | <b>P_value</b> | <b>FDR</b> |
|---------------------------|-------------|----------------|------------|
| <i>NEK1</i>               | rs4434205   | 5.58E-27       | 0.00E+00   |
| <i>HLA-W</i>              | rs1655905   | 6.46E-27       | 0.00E+00   |
| <i>RP11-455F5.4</i>       | rs4424923   | 6.91E-27       | 0.00E+00   |
| <i>MSL2</i>               | rs7349597   | 7.00E-27       | 0.00E+00   |
| <i>TRIM10</i>             | rs3132651   | 8.13E-27       | 0.00E+00   |
| <i>ATF6B</i>              | rs519417    | 9.94E-27       | 0.00E+00   |
| <i>TRIM31</i>             | rs1610752   | 1.50E-26       | 0.00E+00   |
| <i>ITPR3</i>              | rs756139    | 3.43E-26       | 0.00E+00   |
| <i>SF3B1</i>              | rs1560277   | 3.64E-26       | 0.00E+00   |
| <i>HLA-P</i>              | rs3132690   | 4.92E-26       | 0.00E+00   |
| <i>PSMD6</i>              | rs7627690   | 5.63E-26       | 0.00E+00   |
| <i>RP11-245J9.4</i>       | rs7627690   | 5.63E-26       | 0.00E+00   |
| <i>RP1-97J1.2</i>         | rs6921229   | 7.03E-26       | 0.00E+00   |
| <i>GPANK1</i>             | rs805303    | 1.22E-25       | 0.00E+00   |
| <i>ATP6V1G2-DDX39B</i>    | rs1005599   | 1.47E-25       | 0.00E+00   |
| <i>ATP6V1G2</i>           | rs1005599   | 1.47E-25       | 0.00E+00   |
| <i>MICE</i>               | rs1610622   | 2.79E-25       | 0.00E+00   |
| <i>HCG22</i>              | rs2246330   | 4.70E-25       | 0.00E+00   |
| <i>MICA</i>               | rs1005598   | 5.06E-25       | 0.00E+00   |
| <i>AIF1</i>               | rs805302    | 9.56E-25       | 0.00E+00   |
| <i>OGFOD2</i>             | rs11608811  | 3.12E-24       | 0.00E+00   |
| <i>XXbac-BPG248L24.11</i> | rs2905737   | 3.78E-24       | 0.00E+00   |
| <i>MUC21</i>              | rs9263970   | 1.12E-23       | 0.00E+00   |
| <i>HLA-DPA1</i>           | rs114132738 | 1.88E-23       | 0.00E+00   |
| <i>HLA-DPB1</i>           | rs114132738 | 1.88E-23       | 0.00E+00   |
| <i>MCCD1P2</i>            | rs1633086   | 2.77E-23       | 0.00E+00   |
| <i>MCCD1</i>              | rs1633086   | 2.77E-23       | 0.00E+00   |
| <i>TDRD9</i>              | rs10132641  | 5.63E-23       | 0.00E+00   |
| <i>ZSCAN16</i>            | rs35345226  | 8.38E-23       | 0.00E+00   |
| <i>ATG13</i>              | rs55657382  | 1.13E-22       | 0.00E+00   |
| <i>GABBR1</i>             | rs3117289   | 1.54E-22       | 0.00E+00   |
| <i>RP1-265C24.8</i>       | rs9393886   | 1.81E-22       | 0.00E+00   |
| <i>RP1-265C24.9</i>       | rs9393886   | 1.81E-22       | 0.00E+00   |
| <i>ZNF165</i>             | rs9393886   | 3.36E-22       | 0.00E+00   |
| <i>PBX2</i>               | rs204994    | 6.22E-22       | 0.00E+00   |
| <i>VRK2</i>               | rs2465804   | 8.25E-22       | 0.00E+00   |
| <i>MCCD1P1</i>            | rs1610720   | 8.26E-22       | 0.00E+00   |
| <i>HCG11</i>              | rs35942482  | 1.26E-21       | 0.00E+00   |
| <i>AC073043.2</i>         | rs1658810   | 1.99E-21       | 0.00E+00   |
| <i>NOTCH4</i>             | rs389883    | 2.20E-21       | 0.00E+00   |
| <i>ARPC3</i>              | rs11065647  | 2.41E-21       | 0.00E+00   |
| <i>RP11-478C19.2</i>      | rs11065647  | 2.41E-21       | 0.00E+00   |
| <i>CTC-479C5.17</i>       | rs9922594   | 3.09E-21       | 0.00E+00   |

| <b>Gene</b>          | <b>SNP</b> | <b>P_value</b> | <b>FDR</b> |
|----------------------|------------|----------------|------------|
| <i>SLC12A4</i>       | rs9922594  | 3.09E-21       | 0.00E+00   |
| <i>PPP1R16B</i>      | rs12625702 | 5.77E-21       | 0.00E+00   |
| <i>HCG4P8</i>        | rs1655905  | 7.23E-21       | 0.00E+00   |
| <i>DOPEY1</i>        | rs4470825  | 1.02E-20       | 0.00E+00   |
| <i>IRF3</i>          | rs1045567  | 1.27E-20       | 0.00E+00   |
| <i>HIST1H1T</i>      | rs198811   | 1.54E-20       | 0.00E+00   |
| <i>MICD</i>          | rs1611350  | 2.54E-20       | 0.00E+00   |
| <i>ALG1L13P</i>      | rs2945247  | 3.33E-20       | 0.00E+00   |
| <i>AL022393.7</i>    | rs1225715  | 5.63E-20       | 0.00E+00   |
| <i>VSIG2</i>         | rs12293621 | 6.02E-20       | 0.00E+00   |
| <i>DPEP2</i>         | rs56303487 | 8.48E-20       | 0.00E+00   |
| <i>HLA-T</i>         | rs3129012  | 1.07E-19       | 0.00E+00   |
| <i>TRANK1</i>        | rs73068054 | 3.79E-19       | 0.00E+00   |
| <i>PSMA4</i>         | rs905739   | 4.21E-19       | 0.00E+00   |
| <i>CKB</i>           | rs58033365 | 4.36E-19       | 0.00E+00   |
| <i>SLC17A3</i>       | rs1165159  | 5.12E-19       | 0.00E+00   |
| <i>MRPS21</i>        | rs12124898 | 9.73E-19       | 0.00E+00   |
| <i>SGK223</i>        | rs2948293  | 1.18E-18       | 0.00E+00   |
| <i>HIST1H2BD</i>     | rs9358914  | 1.81E-18       | 0.00E+00   |
| <i>PCNXL3</i>        | rs1193851  | 3.81E-18       | 0.00E+00   |
| <i>WHSC1L1</i>       | rs11777811 | 6.27E-18       | 0.00E+00   |
| <i>CHRNA5</i>        | rs905739   | 2.32E-17       | 0.00E+00   |
| <i>RP11-650L12.2</i> | rs905739   | 2.32E-17       | 0.00E+00   |
| <i>ALAS1</i>         | rs352139   | 4.00E-17       | 0.00E+00   |
| <i>RP11-753C18.8</i> | rs284863   | 6.79E-17       | 0.00E+00   |
| <i>ESRP2</i>         | rs9922594  | 7.50E-17       | 0.00E+00   |
| <i>NFATC3</i>        | rs9922594  | 7.50E-17       | 0.00E+00   |
| <i>RP11-96D1.10</i>  | rs9922594  | 7.50E-17       | 0.00E+00   |
| <i>RP11-96D1.11</i>  | rs9922594  | 7.50E-17       | 0.00E+00   |
| <i>HLA-DOB</i>       | rs4947350  | 2.10E-16       | 0.00E+00   |
| <i>BTN3A3</i>        | rs6926677  | 3.82E-16       | 0.00E+00   |
| <i>NEK4</i>          | rs2710323  | 5.34E-16       | 0.00E+00   |
| <i>HSPE1</i>         | rs3792159  | 8.08E-16       | 0.00E+00   |
| <i>SRPK2</i>         | rs6968335  | 1.24E-15       | 0.00E+00   |
| <i>ZNF592</i>        | rs11636499 | 1.36E-15       | 0.00E+00   |
| <i>RP11-455F5.3</i>  | rs4788197  | 1.57E-15       | 0.00E+00   |
| <i>EGFL8</i>         | rs2280774  | 1.59E-15       | 0.00E+00   |
| <i>STAB1</i>         | rs2276834  | 1.73E-15       | 0.00E+00   |
| <i>HLA-DRA</i>       | rs2002777  | 2.36E-15       | 0.00E+00   |
| <i>RP4-669P10.16</i> | rs134885   | 3.09E-15       | 0.00E+00   |
| <i>RP4-669P10.18</i> | rs134885   | 3.09E-15       | 0.00E+00   |
| <i>APOPT1</i>        | rs35498576 | 3.60E-15       | 0.00E+00   |
| <i>LEMD2</i>         | rs756139   | 5.88E-15       | 0.00E+00   |

| <b>Gene</b>               | <b>SNP</b>  | <b>P_value</b> | <b>FDR</b> |
|---------------------------|-------------|----------------|------------|
| <i>HCG4P11</i>            | rs3132690   | 8.49E-15       | 0.00E+00   |
| <i>HCG4P7</i>             | rs1655905   | 1.03E-14       | 0.00E+00   |
| <i>CFB</i>                | rs3134940   | 1.06E-14       | 0.00E+00   |
| <i>ALDH16A1</i>           | rs1045567   | 1.12E-14       | 0.00E+00   |
| <i>ZFYVE21</i>            | rs2368560   | 1.69E-14       | 0.00E+00   |
| <i>GRAP</i>               | rs66885728  | 2.22E-14       | 0.00E+00   |
| <i>SLC5A10</i>            | rs66885728  | 2.22E-14       | 0.00E+00   |
| <i>HIST1H3E</i>           | rs198811    | 2.62E-14       | 0.00E+00   |
| <i>ASPHD1</i>             | rs4424923   | 2.75E-14       | 0.00E+00   |
| <i>CTD-2574D22.4</i>      | rs4424923   | 2.75E-14       | 0.00E+00   |
| <i>KCTD13</i>             | rs4424923   | 2.75E-14       | 0.00E+00   |
| <i>ALKBH5</i>             | rs7207461   | 2.90E-14       | 0.00E+00   |
| <i>RP11-258F1.1</i>       | rs7207461   | 2.90E-14       | 0.00E+00   |
| <i>HCG4P3</i>             | rs3129012   | 3.43E-14       | 0.00E+00   |
| <i>AC092653.5</i>         | rs11903916  | 3.58E-14       | 0.00E+00   |
| <i>ZNF192P1</i>           | rs1225715   | 3.73E-14       | 0.00E+00   |
| <i>EPHX2</i>              | rs111659883 | 4.27E-14       | 0.00E+00   |
| <i>RP11-209D14.2</i>      | rs72843506  | 5.40E-14       | 0.00E+00   |
| <i>NDUFA6</i>             | rs5751241   | 6.09E-14       | 0.00E+00   |
| <i>RCN3</i>               | rs57940349  | 6.69E-14       | 0.00E+00   |
| <i>AC010746.3</i>         | rs10931779  | 7.96E-14       | 0.00E+00   |
| <i>AC103965.1</i>         | rs220333    | 9.28E-14       | 0.00E+00   |
| <i>AC136698.1</i>         | rs220333    | 9.28E-14       | 0.00E+00   |
| <i>ULK2</i>               | rs72843506  | 1.20E-13       | 0.00E+00   |
| <i>CTA-14H9.5</i>         | rs2073526   | 1.74E-13       | 0.00E+00   |
| <i>DHFRP2</i>             | rs2395476   | 2.17E-13       | 0.00E+00   |
| <i>PRRT1</i>              | rs3130281   | 2.19E-13       | 0.00E+00   |
| <i>AL049840.1</i>         | rs10132641  | 2.52E-13       | 0.00E+00   |
| <i>SNORD48</i>            | rs805303    | 2.85E-13       | 0.00E+00   |
| <i>VWA7</i>               | rs805303    | 3.23E-13       | 0.00E+00   |
| <i>ZSCAN23</i>            | rs9885928   | 3.41E-13       | 0.00E+00   |
| <i>RP11-513D5.5</i>       | rs17435276  | 5.96E-13       | 0.00E+00   |
| <i>XXbac-BPG299F13.16</i> | rs2394885   | 7.08E-13       | 0.00E+00   |
| <i>ZNF204P</i>            | rs61240102  | 7.19E-13       | 0.00E+00   |
| <i>MEF2B</i>              | rs2905432   | 9.78E-13       | 0.00E+00   |
| <i>TSR1</i>               | rs2224770   | 1.14E-12       | 0.00E+00   |
| <i>DHX35</i>              | rs208810    | 1.18E-12       | 0.00E+00   |
| <i>APOM</i>               | rs2736425   | 1.36E-12       | 0.00E+00   |
| <i>TRIM8</i>              | rs284862    | 1.37E-12       | 0.00E+00   |
| <i>ATXN7</i>              | rs7615475   | 2.20E-12       | 0.00E+00   |
| <i>DFNA5</i>              | rs79210963  | 3.01E-12       | 0.00E+00   |
| <i>RP11-600F24.7</i>      | rs4906336   | 3.13E-12       | 0.00E+00   |
| <i>PITPNM2</i>            | rs655293    | 3.53E-12       | 0.00E+00   |

| <b>Gene</b>             | <b>SNP</b>  | <b>P_value</b> | <b>FDR</b> |
|-------------------------|-------------|----------------|------------|
| <i>GLT8D1</i>           | rs35249778  | 3.56E-12       | 0.00E+00   |
| <i>LRLE1</i>            | rs1878561   | 4.47E-12       | 0.00E+00   |
| <i>STK19P</i>           | rs389883    | 4.48E-12       | 0.00E+00   |
| <i>STK19</i>            | rs389883    | 4.48E-12       | 0.00E+00   |
| <i>PPT2</i>             | rs3130281   | 4.58E-12       | 0.00E+00   |
| <i>DDX39B-AS1</i>       | rs3130621   | 5.16E-12       | 0.00E+00   |
| <i>SNORD84</i>          | rs3130621   | 5.16E-12       | 0.00E+00   |
| <i>AL021917.1</i>       | rs9358933   | 5.60E-12       | 0.00E+00   |
| <i>GPN1</i>             | rs4632296   | 9.90E-12       | 0.00E+00   |
| <i>SUPT7L</i>           | rs4632296   | 9.90E-12       | 0.00E+00   |
| <i>PLEKHO1</i>          | rs1824850   | 1.33E-11       | 0.00E+00   |
| <i>NEU1</i>             | rs1265947   | 1.46E-11       | 0.00E+00   |
| <i>HIST1H2BC</i>        | rs13196986  | 1.46E-11       | 0.00E+00   |
| <i>U6</i>               | rs284863    | 1.59E-11       | 0.00E+00   |
| <i>HIST1H4K</i>         | rs2056924   | 2.08E-11       | 0.00E+00   |
| <i>FAM86B3P</i>         | rs2948293   | 2.36E-11       | 0.00E+00   |
| <i>AC002306.1</i>       | rs7249692   | 2.66E-11       | 0.00E+00   |
| <i>TRIM26</i>           | rs1117488   | 2.76E-11       | 0.00E+00   |
| <i>HIST1H4J</i>         | rs2056924   | 3.00E-11       | 0.00E+00   |
| <i>EGLN1P1</i>          | rs17598603  | 3.36E-11       | 0.00E+00   |
| <i>RP11-182J1.1</i>     | rs17598603  | 3.36E-11       | 0.00E+00   |
| <i>SCAND2P</i>          | rs17598603  | 3.36E-11       | 0.00E+00   |
| <i>BTNL2</i>            | rs3132931   | 4.45E-11       | 0.00E+00   |
| <i>RBM26-AS1</i>        | rs8002042   | 4.95E-11       | 0.00E+00   |
| <i>RBM26</i>            | rs8002042   | 4.95E-11       | 0.00E+00   |
| <i>OR2B8P</i>           | rs2275508   | 6.05E-11       | 0.00E+00   |
| <i>RP11-196G18.22</i>   | rs10888569  | 6.39E-11       | 0.00E+00   |
| <i>AKT3</i>             | rs3006916   | 6.64E-11       | 0.00E+00   |
| <i>SDCCAG8</i>          | rs3006916   | 6.64E-11       | 0.00E+00   |
| <i>FAM213B</i>          | rs2494631   | 8.63E-11       | 0.00E+00   |
| <i>MMEL1</i>            | rs2494631   | 8.63E-11       | 0.00E+00   |
| <i>PSMD6-AS2</i>        | rs832195    | 8.81E-11       | 0.00E+00   |
| <i>FAM154B</i>          | rs75884951  | 8.91E-11       | 0.00E+00   |
| <i>PLCH2</i>            | rs2494631   | 8.92E-11       | 0.00E+00   |
| <i>CTA-250D10.23</i>    | rs133348    | 8.98E-11       | 0.00E+00   |
| <i>CHRNA2</i>           | rs111659883 | 1.05E-10       | 0.00E+00   |
| <i>RPL13P</i>           | rs3131094   | 1.25E-10       | 0.00E+00   |
| <i>XXbac-BPG308K3.6</i> | rs3131094   | 1.25E-10       | 0.00E+00   |
| <i>CTD-2574D22.2</i>    | rs4424923   | 1.29E-10       | 0.00E+00   |
| <i>ANAPC7</i>           | rs11065647  | 1.36E-10       | 0.00E+00   |
| <i>MICF</i>             | rs3128992   | 1.37E-10       | 0.00E+00   |
| <i>TSNAXIP1</i>         | rs7204208   | 1.41E-10       | 0.00E+00   |
| <i>ITIH1</i>            | rs4687663   | 1.64E-10       | 0.00E+00   |

| <b>Gene</b>              | <b>SNP</b>  | <b>P_value</b> | <b>FDR</b> |
|--------------------------|-------------|----------------|------------|
| <i>FCGRT</i>             | rs10417980  | 1.98E-10       | 0.00E+00   |
| <i>RPL13A</i>            | rs10417980  | 2.32E-10       | 0.00E+00   |
| <i>NRGN</i>              | rs36053597  | 2.63E-10       | 0.00E+00   |
| <i>PRR12</i>             | rs10417980  | 2.74E-10       | 0.00E+00   |
| <i>PPP2R3A</i>           | rs7349597   | 4.02E-10       | 0.00E+00   |
| <i>FANCL</i>             | rs2678904   | 4.98E-10       | 0.00E+00   |
| <i>RP11-457M11.2</i>     | rs13215020  | 5.04E-10       | 0.00E+00   |
| <i>ZNF322</i>            | rs13215020  | 5.04E-10       | 0.00E+00   |
| <i>IFITM4P</i>           | rs1610622   | 5.21E-10       | 0.00E+00   |
| <i>RP11-499P20.2</i>     | rs6482406   | 6.53E-10       | 0.00E+00   |
| <i>RFT1</i>              | rs9836499   | 6.58E-10       | 0.00E+00   |
| <i>ATP13A1</i>           | rs7249692   | 7.19E-10       | 0.00E+00   |
| <i>NELFE</i>             | rs2280774   | 7.92E-10       | 6.21E-06   |
| <i>SUGP1</i>             | rs2916068   | 8.10E-10       | 6.21E-06   |
| <i>FAM83G</i>            | rs66885728  | 9.73E-10       | 6.18E-06   |
| <i>CLU</i>               | rs9331950   | 1.22E-09       | 6.15E-06   |
| <i>DNAH1</i>             | rs7629072   | 1.41E-09       | 6.13E-06   |
| <i>CENPM</i>             | rs9620001   | 1.54E-09       | 6.12E-06   |
| <i>GULOP</i>             | rs111659883 | 1.56E-09       | 6.12E-06   |
| <i>ZNF311</i>            | rs2765218   | 1.60E-09       | 6.11E-06   |
| <i>DDX39BP1</i>          | rs1632910   | 1.65E-09       | 6.11E-06   |
| <i>SLC4A1AP</i>          | rs13001060  | 1.74E-09       | 6.10E-06   |
| <i>SLC44A4</i>           | rs622871    | 2.12E-09       | 6.07E-06   |
| <i>ALPK3</i>             | rs3803405   | 2.61E-09       | 6.05E-06   |
| <i>MICB</i>              | rs2428535   | 2.80E-09       | 6.04E-06   |
| <i>HARBI1</i>            | rs11038906  | 3.17E-09       | 6.02E-06   |
| <i>NHP2L1</i>            | rs9607850   | 3.36E-09       | 6.01E-06   |
| <i>C12orf65</i>          | rs10846491  | 3.54E-09       | 6.01E-06   |
| <i>RFTN2</i>             | rs11900232  | 3.57E-09       | 6.01E-06   |
| <i>ZBTB9</i>             | rs3135406   | 4.53E-09       | 5.97E-06   |
| <i>HCG9P5</i>            | rs1610622   | 4.83E-09       | 5.97E-06   |
| <i>MIR378I</i>           | rs133348    | 5.68E-09       | 1.19E-05   |
| <i>MVP</i>               | rs4788197   | 7.20E-09       | 1.18E-05   |
| <i>HIST1H3B</i>          | rs13196986  | 7.65E-09       | 1.18E-05   |
| <i>BCL2L12</i>           | rs1045567   | 7.88E-09       | 1.77E-05   |
| <i>NCR3</i>              | rs2523598   | 8.81E-09       | 1.77E-05   |
| <i>GIGYF2</i>            | rs2012423   | 1.01E-08       | 1.76E-05   |
| <i>SEC11A</i>            | rs11637728  | 1.18E-08       | 2.34E-05   |
| <i>RPL32P1</i>           | rs114132738 | 1.19E-08       | 2.34E-05   |
| <i>RPL3</i>              | rs114132738 | 1.19E-08       | 2.34E-05   |
| <i>PSMB8</i>             | rs9276915   | 1.20E-08       | 2.34E-05   |
| <i>XXbac-BPG246D15.8</i> | rs9276915   | 1.20E-08       | 2.34E-05   |
| <i>HLA-DOA</i>           | rs209474    | 1.35E-08       | 2.34E-05   |



| <b>Gene</b>              | <b>SNP</b> | <b>P_value</b> | <b>FDR</b> |
|--------------------------|------------|----------------|------------|
| <i>PGM3</i>              | rs4470825  | 1.52E-08       | 2.33E-05   |
| <i>GTF2H4</i>            | rs1110482  | 1.92E-08       | 3.48E-05   |
| <i>BAG4</i>              | rs4537271  | 2.58E-08       | 3.45E-05   |
| <i>LSM1</i>              | rs4537271  | 2.58E-08       | 3.45E-05   |
| <i>LST1</i>              | rs2523554  | 2.80E-08       | 4.02E-05   |
| <i>NFKBIL1</i>           | rs1800629  | 2.92E-08       | 4.02E-05   |
| <i>RP1-59D14.3</i>       | rs12943566 | 3.00E-08       | 4.59E-05   |
| <i>MGAT3</i>             | rs5757717  | 3.09E-08       | 4.59E-05   |
| <i>HIST1H1E</i>          | rs13196986 | 3.45E-08       | 4.57E-05   |
| <i>CTC-228N24.3</i>      | rs2764766  | 4.02E-08       | 4.56E-05   |
| <i>RP11-325F22.5</i>     | rs7807853  | 5.82E-08       | 5.08E-05   |
| <i>TNF</i>               | rs5996116  | 6.58E-08       | 6.20E-05   |
| <i>TNFRSF13C</i>         | rs5996116  | 6.58E-08       | 6.20E-05   |
| <i>CACNB2</i>            | rs6482406  | 6.85E-08       | 6.19E-05   |
| <i>MSH5</i>              | rs805303   | 8.33E-08       | 6.16E-05   |
| <i>MSH5-SAPCD1</i>       | rs805303   | 8.33E-08       | 6.16E-05   |
| <i>SAPCD1</i>            | rs805303   | 8.33E-08       | 6.16E-05   |
| <i>FAM53C</i>            | rs3756766  | 9.28E-08       | 8.37E-05   |
| <i>RP11-256P1.1</i>      | rs3756766  | 9.28E-08       | 8.37E-05   |
| <i>HIST1H2BO</i>         | rs760587   | 9.70E-08       | 8.37E-05   |
| <i>DGKZ</i>              | rs876701   | 1.14E-07       | 8.34E-05   |
| <i>CHRNA3</i>            | rs905739   | 1.25E-07       | 8.32E-05   |
| <i>YPEL4</i>             | rs682503   | 1.44E-07       | 8.84E-05   |
| <i>WDR82</i>             | rs11717383 | 1.52E-07       | 8.83E-05   |
| <i>TOP3A</i>             | rs7207461  | 1.59E-07       | 9.36E-05   |
| <i>HIST2H2AA4</i>        | rs7553622  | 1.73E-07       | 9.89E-05   |
| <i>RP11-73M18.9</i>      | rs10132641 | 2.13E-07       | 1.37E-04   |
| <i>DRG2</i>              | rs9895335  | 2.28E-07       | 1.58E-04   |
| <i>KDM3B</i>             | rs3756766  | 2.35E-07       | 1.69E-04   |
| <i>AC011816.1</i>        | rs73068054 | 2.58E-07       | 1.85E-04   |
| <i>ABT1</i>              | rs13215020 | 2.94E-07       | 2.12E-04   |
| <i>RP11-671M22.5</i>     | rs220333   | 3.31E-07       | 2.43E-04   |
| <i>XXbac-BPG116M5.15</i> | rs389883   | 3.34E-07       | 2.43E-04   |
| <i>CTD-2134A5.4</i>      | rs3212024  | 3.37E-07       | 2.43E-04   |
| <i>STAC3</i>             | rs61937595 | 3.47E-07       | 2.48E-04   |
| <i>CDSN</i>              | rs1005598  | 3.60E-07       | 2.53E-04   |
| <i>HCG20</i>             | rs3131060  | 3.77E-07       | 2.69E-04   |
| <i>DDR1</i>              | rs2246330  | 4.01E-07       | 2.90E-04   |
| <i>HIST1H2AC</i>         | rs198811   | 4.31E-07       | 3.00E-04   |
| <i>RP11-282O18.6</i>     | rs10772999 | 4.34E-07       | 3.06E-04   |
| <i>SBNO1</i>             | rs10772999 | 4.34E-07       | 3.06E-04   |
| <i>RP11-677M14.2</i>     | rs36053597 | 4.57E-07       | 3.32E-04   |
| <i>PPP1R13B</i>          | rs3818085  | 4.86E-07       | 3.74E-04   |

| <b>Gene</b>             | <b>SNP</b> | <b>P_value</b> | <b>FDR</b> |
|-------------------------|------------|----------------|------------|
| <i>ARHGAP1</i>          | rs12574918 | 4.96E-07       | 3.90E-04   |
| <i>GPSM3</i>            | rs204993   | 5.04E-07       | 4.00E-04   |
| <i>RP5-1115A15.1</i>    | rs11121178 | 5.12E-07       | 4.06E-04   |
| <i>RP4-669P10.19</i>    | rs5751220  | 5.34E-07       | 4.32E-04   |
| <i>GID4</i>             | rs8068175  | 5.47E-07       | 4.47E-04   |
| <i>HCP5</i>             | rs3094014  | 5.53E-07       | 4.53E-04   |
| <i>AC027228.1</i>       | rs905739   | 5.94E-07       | 5.10E-04   |
| <i>LRRRC48</i>          | rs4584886  | 6.48E-07       | 5.30E-04   |
| <i>BRD2-IT1</i>         | rs209474   | 6.52E-07       | 5.30E-04   |
| <i>MIR4640</i>          | rs2517472  | 6.80E-07       | 5.67E-04   |
| <i>HIST2H2AA3</i>       | rs10888569 | 7.24E-07       | 6.24E-04   |
| <i>CLCN3</i>            | rs4434205  | 7.29E-07       | 6.24E-04   |
| <i>RP11-196G18.23</i>   | rs10888569 | 7.42E-07       | 6.34E-04   |
| <i>RP11-73M18.6</i>     | rs2295152  | 7.68E-07       | 6.91E-04   |
| <i>SAPCD1-AS1</i>       | rs805303   | 8.97E-07       | 8.04E-04   |
| <i>RP11-269F20.1</i>    | rs3006916  | 9.42E-07       | 8.29E-04   |
| <i>FKBPL</i>            | rs169504   | 1.22E-06       | 1.04E-03   |
| <i>HIST1H4E</i>         | rs9358914  | 1.24E-06       | 1.05E-03   |
| <i>C2orf69</i>          | rs1658810  | 1.25E-06       | 1.06E-03   |
| <i>HSPD1</i>            | rs12693815 | 1.26E-06       | 1.07E-03   |
| <i>CLP1</i>             | rs682503   | 1.31E-06       | 1.11E-03   |
| <i>LTA</i>              | rs2523554  | 1.39E-06       | 1.17E-03   |
| <i>ESAM</i>             | rs12541    | 1.40E-06       | 1.17E-03   |
| <i>PPP1R2P1</i>         | rs9275109  | 1.48E-06       | 1.22E-03   |
| <i>GPM6A</i>            | rs62340589 | 1.62E-06       | 1.33E-03   |
| <i>SLC25A5P1</i>        | rs5751241  | 1.62E-06       | 1.33E-03   |
| <i>GOLGA6L10</i>        | rs75884951 | 1.82E-06       | 1.43E-03   |
| <i>HSPA1L</i>           | rs2075800  | 1.82E-06       | 1.44E-03   |
| <i>OR2H2</i>            | rs3117289  | 1.87E-06       | 1.46E-03   |
| <i>CORO1A</i>           | rs4788198  | 2.03E-06       | 1.59E-03   |
| <i>TAP1</i>             | rs9276905  | 2.05E-06       | 1.59E-03   |
| <i>Y_RNA</i>            | rs1005598  | 2.52E-06       | 1.91E-03   |
| <i>ARL3</i>             | rs284862   | 2.53E-06       | 1.92E-03   |
| <i>RP11-96D1.5</i>      | rs1971546  | 2.69E-06       | 2.05E-03   |
| <i>FYN</i>              | rs1022649  | 2.86E-06       | 2.15E-03   |
| <i>WDR73</i>            | rs220333   | 2.86E-06       | 2.15E-03   |
| <i>HIST1H2AK</i>        | rs35501037 | 2.90E-06       | 2.18E-03   |
| <i>SMIM15</i>           | rs159538   | 3.27E-06       | 2.43E-03   |
| <i>XXbac-BPG16N22.5</i> | rs1005599  | 4.79E-06       | 3.36E-03   |
| <i>SFMBT1</i>           | rs2581819  | 5.39E-06       | 3.82E-03   |
| <i>GNL3</i>             | rs2019065  | 6.26E-06       | 4.40E-03   |
| <i>RP11-600F24.2</i>    | rs35498576 | 6.41E-06       | 4.49E-03   |
| <i>SLC17A1</i>          | rs501220   | 6.83E-06       | 4.77E-03   |

| <b>Gene</b>               | <b>SNP</b>  | <b>P_value</b> | <b>FDR</b> |
|---------------------------|-------------|----------------|------------|
| <i>AL645941.1</i>         | rs209474    | 7.36E-06       | 5.04E-03   |
| <i>XXbac-BPG299F13.15</i> | rs17197637  | 7.51E-06       | 5.18E-03   |
| <i>TYW5</i>               | rs1658810   | 7.61E-06       | 5.24E-03   |
| <i>FGFR1</i>              | rs17435276  | 7.62E-06       | 5.26E-03   |
| <i>RP11-350N15.4</i>      | rs17435276  | 7.62E-06       | 5.26E-03   |
| <i>MEF2BNB-MEF2B</i>      | rs2916068   | 7.93E-06       | 5.47E-03   |
| <i>MEF2BNB</i>            | rs2916068   | 7.93E-06       | 5.47E-03   |
| <i>TCF20</i>              | rs134885    | 8.18E-06       | 5.63E-03   |
| <i>PIH1D1</i>             | rs1045567   | 8.46E-06       | 5.85E-03   |
| <i>SUFU</i>               | rs12573474  | 8.93E-06       | 6.12E-03   |
| <i>HIST1H2BE</i>          | rs66972160  | 9.04E-06       | 6.19E-03   |
| <i>TRIM15</i>             | rs376253    | 9.91E-06       | 6.81E-03   |
| <i>PPP1R11</i>            | rs2571385   | 1.16E-05       | 7.85E-03   |
| <i>RNF39</i>              | rs2571385   | 1.16E-05       | 7.85E-03   |
| <i>CTB-33G10.11</i>       | rs10417980  | 1.23E-05       | 8.32E-03   |
| <i>TLR9</i>               | rs352139    | 1.28E-05       | 8.65E-03   |
| <i>TWF2</i>               | rs352139    | 1.28E-05       | 8.65E-03   |
| <i>SPCS1</i>              | rs35249778  | 1.69E-05       | 1.10E-02   |
| <i>CTD-2589M5.5</i>       | rs11038864  | 1.74E-05       | 1.13E-02   |
| <i>PCGF6</i>              | rs116821290 | 1.74E-05       | 1.13E-02   |
| <i>RP13-942N8.1</i>       | rs10772999  | 2.17E-05       | 1.38E-02   |
| <i>SLX1A-SULT1A3</i>      | rs4788198   | 2.20E-05       | 1.39E-02   |
| <i>SULT1A3</i>            | rs4788198   | 2.20E-05       | 1.39E-02   |
| <i>AC110781.3</i>         | rs7783715   | 2.48E-05       | 1.55E-02   |
| <i>HNRNPA1P16</i>         | rs216199    | 2.71E-05       | 1.68E-02   |
| <i>SMIM4</i>              | rs2276834   | 2.73E-05       | 1.68E-02   |
| <i>CLIC1</i>              | rs805302    | 3.06E-05       | 1.87E-02   |
| <i>SMG6</i>               | rs8076939   | 3.15E-05       | 1.92E-02   |
| <i>MNT</i>                | rs9909895   | 3.18E-05       | 1.94E-02   |
| <i>RP1-59D14.6</i>        | rs9909895   | 3.18E-05       | 1.94E-02   |
| <i>CUTA</i>               | rs210133    | 3.38E-05       | 2.05E-02   |
| <i>PHF1</i>               | rs210133    | 3.38E-05       | 2.05E-02   |
| <i>CTD-3148I10.9</i>      | rs1045567   | 3.45E-05       | 2.08E-02   |
| <i>RPS18</i>              | rs3135406   | 3.63E-05       | 2.19E-02   |
| <i>RP11-457M11.5</i>      | rs13215020  | 3.84E-05       | 2.31E-02   |
| <i>BTN1A1</i>             | rs13215020  | 4.24E-05       | 2.52E-02   |
| <i>NKAPL</i>              | rs1225715   | 4.29E-05       | 2.54E-02   |
| <i>AC073052.1</i>         | rs72974219  | 4.79E-05       | 2.80E-02   |
| <i>OR2W6P</i>             | rs34130214  | 5.13E-05       | 2.98E-02   |
| <i>HCG14</i>              | rs369136    | 5.14E-05       | 2.99E-02   |
| <i>GOLGA6L9</i>           | rs75884951  | 5.23E-05       | 3.03E-02   |
| <i>RP13-608F4.8</i>       | rs75884951  | 5.23E-05       | 3.03E-02   |
| <i>HCG25</i>              | rs3135406   | 6.12E-05       | 3.50E-02   |

| <b>Gene</b>          | <b>SNP</b> | <b>P_value</b> | <b>FDR</b> |
|----------------------|------------|----------------|------------|
| <i>RP4-778K6.3</i>   | rs6968335  | 6.30E-05       | 3.59E-02   |
| <i>RILPL1</i>        | rs10772999 | 6.35E-05       | 3.61E-02   |
| <i>SNRNP35</i>       | rs10772999 | 6.35E-05       | 3.61E-02   |
| <i>RP1-257I20.13</i> | rs2143139  | 6.56E-05       | 3.72E-02   |
| <i>WBP1L</i>         | rs4147157  | 6.86E-05       | 3.85E-02   |
| <i>HIST1H1PS1</i>    | rs198811   | 6.94E-05       | 3.90E-02   |
| <i>HIST2H2BD</i>     | rs7553622  | 7.78E-05       | 4.28E-02   |
| <i>CTC-559E9.6</i>   | rs7252981  | 7.80E-05       | 4.29E-02   |
| <i>GRAPL</i>         | rs66885728 | 7.83E-05       | 4.31E-02   |
| <i>SEMA3G</i>        | rs11717383 | 8.94E-05       | 4.87E-02   |
| <i>APH1A</i>         | rs72694955 | 9.02E-05       | 4.91E-02   |

### 3、pQTL analyses results.

| SNP       | Protein | Adjusted P |
|-----------|---------|------------|
| rs3129887 | B2M     | 1.49E-02   |
| rs2442729 | C2      | 1.87E-02   |
| rs3135394 |         | 5.66E-03   |
| rs3132931 |         | 4.79E-03   |
| rs3096680 |         | 1.42E-03   |
| rs3129887 |         | 1.14E-03   |
| rs9265998 | C4A,C4B | 1.92E-02   |
| rs3134792 |         | 1.92E-02   |
| rs2442729 |         | 1.63E-02   |
| rs1639108 |         | 1.34E-02   |
| rs9268659 |         | 6.65E-03   |
| rs9271333 |         | 5.36E-03   |
| rs2280774 |         | 7.54E-04   |
| rs3094005 |         | 3.01E-04   |
| rs616187  |         | 2.04E-04   |
| rs983561  |         | 1.07E-05   |
| rs3129877 |         | 1.01E-05   |
| rs3135394 |         | 3.48E-06   |
| rs2534679 |         | 1.76E-08   |
| rs3129887 |         | 1.44E-08   |
| rs389883  |         | 3.73E-02   |
| rs9268659 |         | 3.26E-02   |
| rs9263927 |         | 2.33E-02   |
| rs9276351 |         | 1.33E-03   |
| rs2858310 |         | 2.47E-05   |
| rs4248168 |         | 4.28E-08   |
| rs4713580 |         | 1.23E-08   |
| rs2280774 |         | 1.08E-24   |
| rs9271333 | CD70    | 3.26E-02   |
| rs2523554 | EPHA5   | 2.75E-02   |
| rs9263927 | GZMA    | 1.19E-04   |
| rs2523554 |         | 8.61E-05   |
| rs2678905 | GZMB    | 4.28E-02   |
| rs501220  | IFNL2   | 4.02E-02   |
| rs2523886 | LRPAP1  | 6.59E-03   |
| rs9268659 | MICA    | 3.21E-02   |
| rs760587  |         | 2.36E-02   |
| rs3129887 |         | 1.36E-02   |
| rs3129055 |         | 1.24E-02   |
| rs3117289 |         | 7.26E-03   |
| rs2858310 |         | 6.46E-03   |

| SNP       | Protein | Adjusted P |
|-----------|---------|------------|
| rs3132505 |         | 3.35E-03   |
| rs4248168 |         | 1.83E-05   |
| rs3129012 |         | 1.73E-05   |
| rs4713580 |         | 1.34E-05   |
| rs2523886 |         | 7.23E-08   |
| rs3135394 |         | 5.18E-08   |
| rs389883  |         | 8.09E-09   |
| rs9263927 |         | 5.83E-09   |
| rs3094064 |         | 4.72E-10   |
| rs3131060 |         | 2.93E-10   |
| rs886424  |         | 1.96E-10   |
| rs3129984 |         | 1.09E-10   |
| rs3094005 |         | 1.09E-13   |
| rs9265998 |         | 2.15E-14   |
| rs3134792 |         | 2.15E-14   |
| rs1639108 |         | 3.21E-16   |
| rs2523554 |         | 3.96E-21   |
| rs2858310 | MICB    | 4.97E-02   |
| rs2442729 |         | 2.22E-02   |
| rs3129887 |         | 1.99E-02   |
| rs2523554 |         | 1.81E-02   |
| rs3129012 |         | 1.75E-02   |
| rs9271333 |         | 1.32E-02   |
| rs501220  |         | 2.65E-03   |
| rs9276915 |         | 1.56E-05   |
| rs9276351 |         | 1.65E-06   |
| rs4947350 |         | 8.56E-07   |
| rs389883  |         | 4.85E-07   |
| rs3094064 |         | 6.11E-16   |
| rs2534679 |         | 3.09E-17   |
| rs3135394 |         | 4.06E-18   |
| rs3129984 |         | 1.06E-23   |
| rs3131060 |         | 7.09E-24   |
| rs886424  |         | 1.08E-24   |
| rs1639108 |         | 6.39E-25   |
| rs9265998 |         | 4.33E-27   |
| rs3134792 |         | 4.33E-27   |
| rs3094005 |         | 3.05E-33   |
| rs2280774 | MMP8    | 9.02E-04   |
| rs1639108 | MMP9    | 2.36E-02   |
| rs3094005 | PRSS3   | 4.89E-02   |
| rs3132505 |         | 1.73E-02   |
| rs3135394 |         | 6.63E-03   |

| <b>SNP</b> | <b>Protein</b> | <b>Adjusted P</b> |
|------------|----------------|-------------------|
| rs5004276  |                | 4.89E-03          |
| rs2523554  | RB1            | 3.10E-02          |
| rs9276351  | ROBO3          | 7.17E-03          |
| rs4248168  | SERPIND1       | 3.69E-02          |
| rs2056924  | TNFRSF14       | 4.89E-02          |
