# Supplementary material for: Comprehensive functional annotation of susceptibility SNPs prioritized 10 genes for schizophrenia
Source: PubMed Central journal article supplement (PMC6355777; doi:10.1038/s41398-019-0398-5), 2019-01-31
Supplement: 41398_2019_398_MOESM9_ESM.pdf [file 41398_2019_398_MOESM9_ESM.pdf]

Table S7. Differential expression of meta analysis between schizophrenia cases and controls.

| <b>Gene</b>    | <b>N</b> | <b>Zscore</b> | <b>P-value</b> | <b>FDR</b> | <b>Direction</b> |
|----------------|----------|---------------|----------------|------------|------------------|
| <i>VPS29</i>   | 513      | 6.67          | 2.50E-11       | 1.08E-08   | ++               |
| <i>BNIP3L</i>  | 513      | 5.92          | 3.31E-09       | 7.16E-07   | ++               |
| <i>MRPS21</i>  | 513      | 5.64          | 1.67E-08       | 2.40E-06   | ++               |
| <i>HCFC1</i>   | 513      | 5.44          | 5.43E-08       | 5.88E-06   | ++               |
| <i>PSMA4</i>   | 513      | 5.02          | 5.29E-07       | 4.58E-05   | ++               |
| <i>THOC7</i>   | 513      | 4.95          | 7.36E-07       | 5.31E-05   | ++               |
| <i>SF3B1</i>   | 513      | 4.82          | 1.41E-06       | 8.10E-05   | ++               |
| <i>NEK1</i>    | 513      | -4.81         | 1.50E-06       | 8.10E-05   | ---              |
| <i>ACTR1A</i>  | 513      | 4.68          | 2.83E-06       | 1.36E-04   | ++               |
| <i>FAM216A</i> | 513      | -4.60         | 4.22E-06       | 1.83E-04   | ---              |
| <i>BTBD1</i>   | 513      | -4.57         | 4.92E-06       | 1.94E-04   | ---              |
| <i>TCF12</i>   | 513      | -4.50         | 6.87E-06       | 2.48E-04   | ---              |
| <i>FXR1</i>    | 513      | -4.35         | 1.36E-05       | 3.97E-04   | ---              |
| <i>CHRNA2</i>  | 513      | -4.33         | 1.47E-05       | 3.97E-04   | ---              |
| <i>B2M</i>     | 513      | -4.35         | 1.38E-05       | 3.97E-04   | ---              |
| <i>GRIN2A</i>  | 513      | -4.38         | 1.21E-05       | 3.97E-04   | ---              |
| <i>PBX2</i>    | 513      | -4.32         | 1.56E-05       | 3.98E-04   | ---              |
| <i>BTN3A3</i>  | 513      | -4.27         | 1.96E-05       | 4.71E-04   | ---              |
| <i>TAP1</i>    | 513      | -4.17         | 3.03E-05       | 6.91E-04   | ---              |
| <i>TARS2</i>   | 410      | -4.15         | 3.35E-05       | 7.25E-04   | -?-              |
| <i>SOX2</i>    | 513      | -4.13         | 3.63E-05       | 7.49E-04   | ---              |
| <i>ETF1</i>    | 513      | -4.07         | 4.71E-05       | 9.27E-04   | ---              |
| <i>PRRT1</i>   | 410      | -4.00         | 6.34E-05       | 1.19E-03   | -?-              |
| <i>KMT2E</i>   | 513      | -3.98         | 6.84E-05       | 1.23E-03   | ---              |
| <i>MARK3</i>   | 513      | -3.96         | 7.52E-05       | 1.25E-03   | ---              |
| <i>NDUFA6</i>  | 311      | 3.97          | 7.35E-05       | 1.25E-03   | ?+               |
| <i>FGFR1</i>   | 513      | -3.94         | 8.14E-05       | 1.26E-03   | ---              |
| <i>TCF20</i>   | 513      | -3.94         | 8.00E-05       | 1.26E-03   | ---              |
| <i>SRPK2</i>   | 513      | -3.93         | 8.52E-05       | 1.27E-03   | ---              |
| <i>HLA-E</i>   | 513      | -3.89         | 9.98E-05       | 1.44E-03   | ---              |
| <i>BAG4</i>    | 513      | -3.83         | 1.30E-04       | 1.81E-03   | ---              |
| <i>CLU</i>     | 513      | -3.75         | 1.74E-04       | 2.35E-03   | ---              |
| <i>PPP1R11</i> | 513      | -3.64         | 2.78E-04       | 3.65E-03   | ---              |
| <i>PHF1</i>    | 513      | -3.58         | 3.47E-04       | 4.42E-03   | ---              |
| <i>CCDC134</i> | 513      | -3.53         | 4.11E-04       | 5.08E-03   | ---              |
| <i>PLCL1</i>   | 513      | -3.52         | 4.38E-04       | 5.27E-03   | ---              |
| <i>GIGYF2</i>  | 513      | -3.51         | 4.55E-04       | 5.33E-03   | ---              |
| <i>DPYD</i>    | 513      | -3.47         | 5.16E-04       | 5.88E-03   | ---              |
| <i>SKIV2L</i>  | 513      | -3.46         | 5.49E-04       | 6.09E-03   | ---              |
| <i>HLA-G</i>   | 513      | -3.45         | 5.63E-04       | 6.09E-03   | ---              |

| <b>Gene</b>     | <b>N</b> | <b>Zscore</b> | <b>P-value</b> | <b>FDR</b> | <b>Direction</b> |
|-----------------|----------|---------------|----------------|------------|------------------|
| <i>LRRFIP2</i>  | 513      | -3.44         | 5.89E-04       | 6.22E-03   | ---              |
| <i>ANKRD44</i>  | 513      | -3.39         | 6.96E-04       | 7.18E-03   | ---              |
| <i>DDX39B</i>   | 410      | -3.38         | 7.24E-04       | 7.29E-03   | -?-              |
| <i>PLA2G15</i>  | 513      | -3.33         | 8.75E-04       | 8.61E-03   | ---              |
| <i>STK19</i>    | 513      | -3.29         | 9.92E-04       | 9.54E-03   | ---              |
| <i>PITPNM2</i>  | 513      | -3.27         | 1.09E-03       | 1.01E-02   | ---              |
| <i>GATAD2A</i>  | 513      | -3.27         | 1.09E-03       | 1.01E-02   | ---              |
| <i>TMTC1</i>    | 513      | -3.24         | 1.22E-03       | 1.10E-02   | ---              |
| <i>NAA10</i>    | 513      | -3.23         | 1.25E-03       | 1.10E-02   | ---              |
| <i>TRIM35</i>   | 513      | -3.22         | 1.30E-03       | 1.10E-02   | ---              |
| <i>MICB</i>     | 513      | -3.22         | 1.30E-03       | 1.10E-02   | ---              |
| <i>TRIM8</i>    | 513      | -3.20         | 1.38E-03       | 1.15E-02   | ---              |
| <i>ZNF592</i>   | 513      | -3.17         | 1.54E-03       | 1.26E-02   | ---              |
| <i>SLC7A6</i>   | 513      | -3.15         | 1.63E-03       | 1.29E-02   | ---              |
| <i>ABCB9</i>    | 513      | -3.15         | 1.63E-03       | 1.29E-02   | ---              |
| <i>DOPEY1</i>   | 513      | -3.14         | 1.68E-03       | 1.30E-02   | ---              |
| <i>HLA-B</i>    | 513      | -3.13         | 1.77E-03       | 1.35E-02   | ---              |
| <i>HLA-C</i>    | 513      | -3.11         | 1.89E-03       | 1.41E-02   | ---              |
| <i>TWF2</i>     | 513      | -3.08         | 2.06E-03       | 1.49E-02   | ---              |
| <i>STAB1</i>    | 513      | -3.08         | 2.05E-03       | 1.49E-02   | ---              |
| <i>RB1</i>      | 513      | -3.07         | 2.14E-03       | 1.52E-02   | ---              |
| <i>ANP32E</i>   | 513      | -3.05         | 2.31E-03       | 1.61E-02   | ---              |
| <i>AS3MT</i>    | 513      | -3.03         | 2.42E-03       | 1.63E-02   | ---              |
| <i>PRMT7</i>    | 513      | -3.04         | 2.40E-03       | 1.63E-02   | ---              |
| <i>HLA-DOA</i>  | 513      | -3.00         | 2.69E-03       | 1.79E-02   | ---              |
| <i>SPATS2L</i>  | 513      | -2.99         | 2.76E-03       | 1.81E-02   | ---              |
| <i>AGPAT1</i>   | 513      | -2.98         | 2.84E-03       | 1.84E-02   | ---              |
| <i>OR2H2</i>    | 513      | -2.98         | 2.93E-03       | 1.87E-02   | ---              |
| <i>FANCL</i>    | 513      | -2.97         | 3.00E-03       | 1.88E-02   | ---              |
| <i>TOM1L2</i>   | 513      | -2.95         | 3.17E-03       | 1.96E-02   | ---              |
| <i>TNF</i>      | 513      | -2.93         | 3.43E-03       | 2.03E-02   | ---              |
| <i>MSH5</i>     | 202      | -2.93         | 3.38E-03       | 2.03E-02   | -??              |
| <i>GPM6A</i>    | 513      | -2.93         | 3.39E-03       | 2.03E-02   | ---              |
| <i>TNFRSF14</i> | 513      | -2.91         | 3.57E-03       | 2.09E-02   | ---              |
| <i>NAGA</i>     | 513      | -2.88         | 3.95E-03       | 2.28E-02   | ---              |
| <i>MMP8</i>     | 513      | -2.88         | 4.03E-03       | 2.30E-02   | ---              |
| <i>GABBR1</i>   | 513      | -2.86         | 4.22E-03       | 2.35E-02   | ---              |
| <i>MED19</i>    | 513      | -2.85         | 4.32E-03       | 2.35E-02   | ---              |
| <i>CD46</i>     | 311      | -2.85         | 4.34E-03       | 2.35E-02   | ?--              |
| <i>CTSS</i>     | 513      | -2.86         | 4.30E-03       | 2.35E-02   | ---              |
| <i>ANAPC7</i>   | 513      | -2.85         | 4.39E-03       | 2.35E-02   | ---              |
| <i>BTN2A2</i>   | 513      | -2.81         | 4.97E-03       | 2.59E-02   | ---              |
| <i>PPP1R18</i>  | 513      | -2.81         | 4.95E-03       | 2.59E-02   | ---              |

| <b>Gene</b>      | <b>N</b> | <b>Zscore</b> | <b>P-value</b> | <b>FDR</b> | <b>Direction</b> |
|------------------|----------|---------------|----------------|------------|------------------|
| <i>NISCH</i>     | 513      | -2.80         | 5.04E-03       | 2.60E-02   | ---              |
| <i>AKAP10</i>    | 513      | -2.79         | 5.23E-03       | 2.67E-02   | ---              |
| <i>ARL3</i>      | 513      | -2.75         | 5.90E-03       | 2.78E-02   | ---              |
| <i>DDHD2</i>     | 513      | -2.75         | 5.95E-03       | 2.78E-02   | ---              |
| <i>SYNGAP1</i>   | 513      | -2.76         | 5.71E-03       | 2.78E-02   | ---              |
| <i>SPCS1</i>     | 513      | -2.75         | 5.97E-03       | 2.78E-02   | ---              |
| <i>CACNA1C</i>   | 513      | -2.77         | 5.58E-03       | 2.78E-02   | ---              |
| <i>AIF1</i>      | 513      | -2.77         | 5.68E-03       | 2.78E-02   | ---              |
| <i>MPHOSPH9</i>  | 513      | -2.76         | 5.86E-03       | 2.78E-02   | ---              |
| <i>MAU2</i>      | 513      | -2.76         | 5.82E-03       | 2.78E-02   | ---              |
| <i>ZSCAN16</i>   | 513      | -2.74         | 6.10E-03       | 2.81E-02   | ---              |
| <i>LRPAP1</i>    | 513      | -2.72         | 6.62E-03       | 2.84E-02   | ---              |
| <i>APH1A</i>     | 513      | -2.72         | 6.61E-03       | 2.84E-02   | ---              |
| <i>TMX2</i>      | 513      | -2.72         | 6.45E-03       | 2.84E-02   | ---              |
| <i>HIST1H2AC</i> | 513      | -2.73         | 6.32E-03       | 2.84E-02   | ---              |
| <i>ARHGAP1</i>   | 513      | 2.72          | 6.51E-03       | 2.84E-02   | +--              |
| <i>YPEL3</i>     | 513      | -2.73         | 6.36E-03       | 2.84E-02   | ---              |
| <i>TRIM26</i>    | 513      | 2.73          | 6.36E-03       | 2.84E-02   | +--              |
| <i>NAB2</i>      | 513      | -2.71         | 6.79E-03       | 2.88E-02   | ---              |
| <i>SGK223</i>    | 513      | 2.70          | 6.91E-03       | 2.91E-02   | +--              |
| <i>MGAT3</i>     | 513      | -2.69         | 7.08E-03       | 2.95E-02   | ---              |
| <i>PLEKHO1</i>   | 513      | -2.69         | 7.23E-03       | 2.98E-02   | ---              |
| <i>ESR2</i>      | 513      | -2.68         | 7.48E-03       | 3.06E-02   | ---              |
| <i>TOP3A</i>     | 513      | -2.66         | 7.92E-03       | 3.09E-02   | ---              |
| <i>IGSF9B</i>    | 311      | 2.66          | 7.87E-03       | 3.09E-02   | ?-+              |
| <i>NELFE</i>     | 410      | -2.66         | 7.72E-03       | 3.09E-02   | -?-              |
| <i>HSPA1A</i>    | 410      | 2.66          | 7.81E-03       | 3.09E-02   | -?+              |
| <i>PLAG1</i>     | 513      | -2.66         | 7.82E-03       | 3.09E-02   | ---              |
| <i>BTN2A1</i>    | 513      | -2.62         | 8.78E-03       | 3.39E-02   | ---              |
| <i>ZSCAN2</i>    | 513      | -2.61         | 9.04E-03       | 3.46E-02   | ---              |
| <i>RCN3</i>      | 513      | -2.61         | 9.17E-03       | 3.48E-02   | ---              |
| <i>CSNK2B</i>    | 513      | -2.60         | 9.42E-03       | 3.53E-02   | ---              |
| <i>HLA-DRB1</i>  | 513      | -2.59         | 9.62E-03       | 3.53E-02   | ---              |
| <i>TNXB</i>      | 513      | -2.59         | 9.59E-03       | 3.53E-02   | ---              |
| <i>ROBO3</i>     | 513      | -2.59         | 9.55E-03       | 3.53E-02   | ---              |
| <i>RNF5</i>      | 513      | 2.59          | 9.73E-03       | 3.54E-02   | +--              |
| <i>C12orf65</i>  | 513      | -2.58         | 9.88E-03       | 3.56E-02   | ---              |
| <i>HIST1H1A</i>  | 513      | -2.57         | 1.02E-02       | 3.65E-02   | ---              |
| <i>GPN3</i>      | 513      | -2.56         | 1.03E-02       | 3.67E-02   | ---              |
| <i>MEI1</i>      | 513      | -2.56         | 1.05E-02       | 3.71E-02   | ---              |
| <i>HIST1H2AK</i> | 513      | -2.55         | 1.09E-02       | 3.82E-02   | ---              |
| <i>FURIN</i>     | 513      | -2.53         | 1.15E-02       | 3.93E-02   | ---              |
| <i>SNRNP35</i>   | 513      | -2.53         | 1.15E-02       | 3.93E-02   | ---              |

| <b>Gene</b>      | <b>N</b> | <b>Zscore</b> | <b>P-value</b> | <b>FDR</b> | <b>Direction</b> |
|------------------|----------|---------------|----------------|------------|------------------|
| <i>LY6G5C</i>    | 513      | -2.53         | 1.14E-02       | 3.93E-02   | ---              |
| <i>STAT6</i>     | 513      | -2.52         | 1.17E-02       | 3.96E-02   | ---              |
| <i>TSSK6</i>     | 513      | -2.52         | 1.18E-02       | 3.97E-02   | ---              |
| <i>SEPT3</i>     | 513      | -2.51         | 1.22E-02       | 4.04E-02   | ---              |
| <i>ZSCAN23</i>   | 311      | -2.51         | 1.22E-02       | 4.04E-02   | ?--              |
| <i>ALAS1</i>     | 513      | -2.50         | 1.24E-02       | 4.06E-02   | ---              |
| <i>TYW5</i>      | 513      | -2.50         | 1.25E-02       | 4.08E-02   | ---              |
| <i>HIST1H2BD</i> | 513      | -2.49         | 1.27E-02       | 4.10E-02   | ---              |
| <i>HSPA1L</i>    | 513      | -2.49         | 1.29E-02       | 4.15E-02   | ---              |
| <i>CTNNA1</i>    | 513      | -2.48         | 1.33E-02       | 4.21E-02   | ---              |
| <i>PLCH2</i>     | 513      | -2.48         | 1.33E-02       | 4.21E-02   | ---              |
| <i>VWA7</i>      | 513      | -2.47         | 1.35E-02       | 4.23E-02   | ---              |
| <i>ARL6IP4</i>   | 513      | -2.46         | 1.37E-02       | 4.28E-02   | ---              |
| <i>ZDHHC5</i>    | 513      | -2.46         | 1.39E-02       | 4.29E-02   | ---              |
| <i>BRD2</i>      | 513      | -2.45         | 1.44E-02       | 4.42E-02   | ---              |
| <i>MOG</i>       | 513      | -2.44         | 1.46E-02       | 4.44E-02   | ---              |
| <i>TMEM219</i>   | 513      | -2.44         | 1.47E-02       | 4.46E-02   | ---              |
| <i>PPP1R13B</i>  | 513      | -2.44         | 1.48E-02       | 4.46E-02   | ---              |
| <i>PRR12</i>     | 513      | -2.43         | 1.51E-02       | 4.49E-02   | ---              |
| <i>HLA-DQB1</i>  | 513      | -2.42         | 1.55E-02       | 4.57E-02   | ---              |
| <i>AGER</i>      | 513      | -2.42         | 1.55E-02       | 4.57E-02   | ---              |
| <i>TAP2</i>      | 513      | -2.40         | 1.63E-02       | 4.63E-02   | ---              |
| <i>HIST1H4J</i>  | 513      | -2.40         | 1.64E-02       | 4.63E-02   | ---              |
| <i>PPP1CC</i>    | 513      | 2.40          | 1.63E-02       | 4.63E-02   | +--              |
| <i>MAFG</i>      | 513      | -2.41         | 1.59E-02       | 4.63E-02   | ---              |
| <i>MYC</i>       | 513      | -2.41         | 1.60E-02       | 4.63E-02   | ---              |
| <i>NOTCH4</i>    | 513      | -2.40         | 1.62E-02       | 4.63E-02   | ---              |
| <i>L3MBTL2</i>   | 513      | 2.39          | 1.67E-02       | 4.71E-02   | +--              |
| <i>MAPK3</i>     | 513      | 2.38          | 1.75E-02       | 4.75E-02   | +--              |
| <i>NKAPL</i>     | 513      | -2.38         | 1.71E-02       | 4.75E-02   | ---              |
| <i>MZF1</i>      | 513      | -2.38         | 1.74E-02       | 4.75E-02   | ---              |
| <i>SRR</i>       | 513      | -2.38         | 1.74E-02       | 4.75E-02   | ---              |
| <i>TBX6</i>      | 513      | -2.38         | 1.75E-02       | 4.75E-02   | ---              |
| <i>ZFX</i>       | 513      | -2.38         | 1.74E-02       | 4.75E-02   | ---              |
| <i>C6orf47</i>   | 513      | -2.37         | 1.78E-02       | 4.79E-02   | ---              |
| <i>SMG6</i>      | 513      | -2.36         | 1.85E-02       | 4.85E-02   | ---              |
| <i>GLYCTK</i>    | 513      | -2.36         | 1.85E-02       | 4.85E-02   | ---              |
| <i>SLC12A4</i>   | 513      | -2.36         | 1.85E-02       | 4.85E-02   | ---              |
| <i>FAM213B</i>   | 311      | -2.36         | 1.85E-02       | 4.85E-02   | ?--              |
| <i>BACH1</i>     | 513      | -2.35         | 1.88E-02       | 4.90E-02   | ---              |
| <i>HSPA9</i>     | 513      | 2.35          | 1.90E-02       | 4.92E-02   | --+              |
| <i>ALPK3</i>     | 513      | -2.34         | 1.92E-02       | 4.94E-02   | ---              |
| <i>ATP6V1G2</i>  | 513      | -2.33         | 1.96E-02       | 5.02E-02   | ---              |

| <b>Gene</b>      | <b>N</b> | <b>Zscore</b> | <b>P-value</b> | <b>FDR</b> | <b>Direction</b> |
|------------------|----------|---------------|----------------|------------|------------------|
| <i>APOM</i>      | 513      | -2.33         | 2.00E-02       | 5.09E-02   | ---              |
| <i>ITPR3</i>     | 513      | -2.32         | 2.05E-02       | 5.20E-02   | ---              |
| <i>HSPA1B</i>    | 202      | -2.31         | 2.07E-02       | 5.21E-02   | -??              |
| <i>PAX5</i>      | 513      | -2.31         | 2.11E-02       | 5.27E-02   | ---              |
| <i>HLA-DPA1</i>  | 513      | -2.29         | 2.19E-02       | 5.44E-02   | ---              |
| <i>GLT8D1</i>    | 513      | -2.29         | 2.21E-02       | 5.46E-02   | ---              |
| <i>TRMT61A</i>   | 513      | -2.28         | 2.24E-02       | 5.47E-02   | ---              |
| <i>SDCCAG8</i>   | 513      | -2.29         | 2.23E-02       | 5.47E-02   | ---              |
| <i>MAN2A1</i>    | 513      | -2.28         | 2.25E-02       | 5.48E-02   | ---              |
| <i>KDM3B</i>     | 513      | -2.27         | 2.32E-02       | 5.58E-02   | ---              |
| <i>VAR52</i>     | 513      | -2.27         | 2.31E-02       | 5.58E-02   | ---              |
| <i>EPHA5</i>     | 513      | -2.26         | 2.41E-02       | 5.76E-02   | ---              |
| <i>C2</i>        | 513      | -2.25         | 2.48E-02       | 5.86E-02   | ---              |
| <i>DRD2</i>      | 513      | -2.25         | 2.47E-02       | 5.86E-02   | ---              |
| <i>KLF5</i>      | 513      | -2.23         | 2.56E-02       | 5.93E-02   | ---              |
| <i>BAK1</i>      | 513      | -2.24         | 2.53E-02       | 5.93E-02   | ---              |
| <i>SP2</i>       | 513      | 2.23          | 2.58E-02       | 5.93E-02   | +--              |
| <i>TNFRSF13C</i> | 513      | -2.23         | 2.55E-02       | 5.93E-02   | ---              |
| <i>CYP2D6</i>    | 513      | -2.24         | 2.53E-02       | 5.93E-02   | ---              |
| <i>WHSC1L1</i>   | 513      | -2.23         | 2.59E-02       | 5.93E-02   | ---              |
| <i>CYP17A1</i>   | 513      | -2.22         | 2.68E-02       | 6.03E-02   | ---              |
| <i>ZNF354C</i>   | 513      | -2.22         | 2.66E-02       | 6.03E-02   | ---              |
| <i>CLP1</i>      | 513      | -2.22         | 2.66E-02       | 6.03E-02   | ---              |
| <i>C2orf69</i>   | 513      | -2.20         | 2.79E-02       | 6.27E-02   | ---              |
| <i>ATXN7</i>     | 513      | -2.18         | 2.90E-02       | 6.47E-02   | ---              |
| <i>BTN3A2</i>    | 513      | -2.18         | 2.97E-02       | 6.58E-02   | ---              |
| <i>SUGP1</i>     | 311      | -2.17         | 3.01E-02       | 6.58E-02   | ?--              |
| <i>LCAT</i>      | 513      | -2.17         | 3.01E-02       | 6.58E-02   | ---              |
| <i>FCGRT</i>     | 513      | -2.17         | 2.98E-02       | 6.58E-02   | ---              |
| <i>TRANK1</i>    | 513      | 2.16          | 3.11E-02       | 6.76E-02   | +--              |
| <i>ZNRD1</i>     | 513      | -2.14         | 3.21E-02       | 6.94E-02   | ---              |
| <i>ALDH16A1</i>  | 513      | -2.12         | 3.41E-02       | 7.30E-02   | ---              |
| <i>DNAH1</i>     | 513      | -2.12         | 3.39E-02       | 7.30E-02   | ---              |
| <i>TDRD9</i>     | 513      | -2.12         | 3.44E-02       | 7.33E-02   | ---              |
| <i>EHF</i>       | 513      | -2.11         | 3.51E-02       | 7.46E-02   | ---              |
| <i>PACSIN3</i>   | 513      | -2.10         | 3.54E-02       | 7.48E-02   | ---              |
| <i>RENBP</i>     | 513      | 2.10          | 3.57E-02       | 7.49E-02   | +--              |
| <i>SCGN</i>      | 513      | -2.08         | 3.72E-02       | 7.76E-02   | ---              |
| <i>NT5DC2</i>    | 513      | -2.08         | 3.76E-02       | 7.76E-02   | ---              |
| <i>IMMP2L</i>    | 513      | -2.08         | 3.74E-02       | 7.76E-02   | ---              |
| <i>GZMB</i>      | 513      | -2.08         | 3.76E-02       | 7.76E-02   | ---              |
| <i>HLA-DRA</i>   | 513      | -2.08         | 3.80E-02       | 7.80E-02   | ---              |
| <i>SREBF2</i>    | 513      | -2.05         | 4.08E-02       | 8.33E-02   | ---              |

| Gene             | N   | Zscore | P-value  | FDR      | Direction |
|------------------|-----|--------|----------|----------|-----------|
| <i>IRF3</i>      | 513 | 2.03   | 4.19E-02 | 8.52E-02 | +--       |
| <i>RPS18</i>     | 513 | 2.03   | 4.26E-02 | 8.62E-02 | +--       |
| <i>C16orf92</i>  | 513 | -2.02  | 4.39E-02 | 8.72E-02 | ---       |
| <i>ATP13A1</i>   | 513 | -2.02  | 4.37E-02 | 8.72E-02 | ---       |
| <i>C6orf10</i>   | 513 | -2.02  | 4.34E-02 | 8.72E-02 | ---       |
| <i>USF2</i>      | 513 | 2.02   | 4.38E-02 | 8.72E-02 | --+       |
| <i>RFT1</i>      | 513 | 2.00   | 4.54E-02 | 8.97E-02 | --+       |
| <i>PRRC2A</i>    | 513 | 2.00   | 4.56E-02 | 8.97E-02 | +--       |
| <i>NT5C2</i>     | 513 | -1.99  | 4.62E-02 | 9.05E-02 | ---       |
| <i>HCG27</i>     | 513 | -1.99  | 4.70E-02 | 9.17E-02 | ---       |
| <i>RXRA</i>      | 513 | -1.96  | 4.96E-02 | 9.63E-02 | ---       |
| <i>RNF39</i>     | 513 | -1.96  | 4.98E-02 | 9.63E-02 | ---       |
| <i>CDC25C</i>    | 513 | -1.95  | 5.08E-02 | 9.77E-02 | ---       |
| <i>BAG5</i>      | 513 | -1.95  | 5.18E-02 | 9.91E-02 | ---       |
| <i>TRIM27</i>    | 513 | -1.94  | 5.27E-02 | 1.00E-01 | ---       |
| <i>WDR73</i>     | 513 | -1.93  | 5.33E-02 | 1.01E-01 | ---       |
| <i>HIST1H2BL</i> | 513 | -1.93  | 5.37E-02 | 1.02E-01 | ---       |
| <i>EMX1</i>      | 513 | -1.93  | 5.42E-02 | 1.02E-01 | ---       |
| <i>STAR</i>      | 513 | -1.93  | 5.40E-02 | 1.02E-01 | ---       |
| <i>TRIM10</i>    | 513 | -1.92  | 5.54E-02 | 1.03E-01 | ---       |
| <i>CACNA2D2</i>  | 513 | 1.91   | 5.56E-02 | 1.03E-01 | +--       |
| <i>ZSCAN31</i>   | 513 | -1.92  | 5.55E-02 | 1.03E-01 | ---       |
| <i>BCL11B</i>    | 513 | -1.91  | 5.61E-02 | 1.03E-01 | ---       |
| <i>DGKZ</i>      | 513 | -1.91  | 5.66E-02 | 1.04E-01 | ---       |
| <i>INO80E</i>    | 513 | -1.90  | 5.78E-02 | 1.05E-01 | ---       |
| <i>NEU1</i>      | 513 | -1.90  | 5.80E-02 | 1.05E-01 | ---       |
| <i>ATF6B</i>     | 513 | -1.89  | 5.82E-02 | 1.05E-01 | ---       |
| <i>PBRM1</i>     | 311 | -1.89  | 5.86E-02 | 1.06E-01 | ?--       |
| <i>HIST1H4H</i>  | 513 | 1.89   | 5.91E-02 | 1.06E-01 | --+       |
| <i>CFB</i>       | 513 | -1.88  | 5.96E-02 | 1.07E-01 | ---       |
| <i>NFKBIL1</i>   | 513 | -1.88  | 6.01E-02 | 1.07E-01 | ---       |
| <i>SFXN2</i>     | 513 | -1.88  | 6.08E-02 | 1.08E-01 | ---       |
| <i>ITIH1</i>     | 513 | -1.87  | 6.09E-02 | 1.08E-01 | ---       |
| <i>PPT2</i>      | 410 | -1.85  | 6.38E-02 | 1.12E-01 | -?-       |
| <i>CCHCR1</i>    | 513 | -1.83  | 6.78E-02 | 1.19E-01 | ---       |
| <i>RAD9B</i>     | 513 | -1.82  | 6.86E-02 | 1.20E-01 | ---       |
| <i>NFE2L1</i>    | 513 | 1.81   | 7.00E-02 | 1.22E-01 | +--       |
| <i>CNNM2</i>     | 513 | -1.80  | 7.19E-02 | 1.25E-01 | ---       |
| <i>LTA</i>       | 513 | -1.79  | 7.31E-02 | 1.25E-01 | ---       |
| <i>HLA-DMB</i>   | 513 | -1.80  | 7.26E-02 | 1.25E-01 | ---       |
| <i>HLA-DPB1</i>  | 513 | -1.79  | 7.29E-02 | 1.25E-01 | ---       |
| <i>DPEP2</i>     | 513 | -1.78  | 7.46E-02 | 1.27E-01 | ---       |
| <i>PSMB8</i>     | 513 | -1.78  | 7.47E-02 | 1.27E-01 | ---       |

| <b>Gene</b>      | <b>N</b> | <b>Zscore</b> | <b>P-value</b> | <b>FDR</b> | <b>Direction</b> |
|------------------|----------|---------------|----------------|------------|------------------|
| <i>DRG2</i>      | 513      | 1.78          | 7.51E-02       | 1.27E-01   | +--              |
| <i>ESR1</i>      | 513      | -1.77         | 7.65E-02       | 1.28E-01   | ---              |
| <i>HLA-F</i>     | 513      | -1.77         | 7.64E-02       | 1.28E-01   | ---              |
| <i>NFKB1</i>     | 513      | -1.76         | 7.78E-02       | 1.30E-01   | ---              |
| <i>YJEFN3</i>    | 513      | -1.75         | 8.00E-02       | 1.33E-01   | ---              |
| <i>CUTA</i>      | 513      | 1.75          | 8.04E-02       | 1.33E-01   | --+              |
| <i>LHFPL3</i>    | 513      | -1.73         | 8.32E-02       | 1.36E-01   | ---              |
| <i>IP6K3</i>     | 513      | -1.73         | 8.31E-02       | 1.36E-01   | ---              |
| <i>POLR3H</i>    | 513      | 1.73          | 8.37E-02       | 1.36E-01   | +--              |
| <i>FAM83G</i>    | 513      | -1.73         | 8.36E-02       | 1.36E-01   | ---              |
| <i>TCF19</i>     | 513      | -1.73         | 8.37E-02       | 1.36E-01   | ---              |
| <i>FAM53C</i>    | 513      | -1.73         | 8.45E-02       | 1.37E-01   | ---              |
| <i>OR2J2</i>     | 513      | -1.72         | 8.59E-02       | 1.39E-01   | ---              |
| <i>ZBTB9</i>     | 513      | -1.72         | 8.64E-02       | 1.39E-01   | ---              |
| <i>GPSM3</i>     | 513      | 1.71          | 8.75E-02       | 1.40E-01   | +--              |
| <i>POU5F1</i>    | 202      | -1.69         | 9.16E-02       | 1.45E-01   | -??              |
| <i>HARBI1</i>    | 513      | -1.69         | 9.15E-02       | 1.45E-01   | ---              |
| <i>SAPCD1</i>    | 410      | -1.69         | 9.12E-02       | 1.45E-01   | -?-              |
| <i>DOC2A</i>     | 513      | -1.68         | 9.31E-02       | 1.47E-01   | ---              |
| <i>FLI1</i>      | 513      | -1.68         | 9.34E-02       | 1.47E-01   | ---              |
| <i>ATPAF2</i>    | 513      | -1.67         | 9.51E-02       | 1.49E-01   | ---              |
| <i>TFAP2C</i>    | 513      | -1.67         | 9.53E-02       | 1.49E-01   | ---              |
| <i>TMEM110</i>   | 513      | -1.66         | 9.72E-02       | 1.51E-01   | ---              |
| <i>SATB2</i>     | 513      | 1.65          | 9.91E-02       | 1.54E-01   | --+              |
| <i>ZSCAN9</i>    | 513      | -1.64         | 1.01E-01       | 1.54E-01   | ---              |
| <i>OGFOD2</i>    | 513      | -1.64         | 1.02E-01       | 1.54E-01   | ---              |
| <i>CLIC1</i>     | 513      | 1.64          | 1.01E-01       | 1.54E-01   | +--              |
| <i>DPCR1</i>     | 513      | -1.65         | 1.00E-01       | 1.54E-01   | ---              |
| <i>HIST1H2AJ</i> | 513      | -1.64         | 1.00E-01       | 1.54E-01   | ---              |
| <i>SREBF1</i>    | 513      | 1.64          | 1.01E-01       | 1.54E-01   | +--              |
| <i>HLA-DQA2</i>  | 202      | -1.63         | 1.03E-01       | 1.56E-01   | -??              |
| <i>HIST1H2BJ</i> | 513      | -1.63         | 1.04E-01       | 1.57E-01   | ---              |
| <i>CILP2</i>     | 513      | -1.62         | 1.04E-01       | 1.57E-01   | ---              |
| <i>PSORS1C1</i>  | 513      | -1.62         | 1.06E-01       | 1.59E-01   | ---              |
| <i>GZMA</i>      | 513      | -1.60         | 1.09E-01       | 1.62E-01   | ---              |
| <i>DUS2</i>      | 513      | -1.60         | 1.09E-01       | 1.62E-01   | ---              |
| <i>PEX10</i>     | 513      | -1.60         | 1.09E-01       | 1.62E-01   | ---              |
| <i>ZNF263</i>    | 410      | -1.60         | 1.10E-01       | 1.62E-01   | -?-              |
| <i>CNTN4</i>     | 513      | -1.60         | 1.10E-01       | 1.62E-01   | ---              |
| <i>BTN1A1</i>    | 513      | -1.60         | 1.10E-01       | 1.62E-01   | ---              |
| <i>FLOT1</i>     | 513      | 1.59          | 1.13E-01       | 1.64E-01   | --+              |
| <i>WBP1L</i>     | 513      | 1.59          | 1.13E-01       | 1.64E-01   | +--              |
| <i>DDAH2</i>     | 513      | -1.56         | 1.18E-01       | 1.72E-01   | ---              |

| <b>Gene</b>     | <b>N</b> | <b>Zscore</b> | <b>P-value</b> | <b>FDR</b> | <b>Direction</b> |
|-----------------|----------|---------------|----------------|------------|------------------|
| <i>C2orf82</i>  | 513      | -1.56         | 1.19E-01       | 1.73E-01   | ---              |
| <i>GDPD3</i>    | 513      | -1.54         | 1.23E-01       | 1.78E-01   | ---              |
| <i>ZKSCAN8</i>  | 513      | -1.54         | 1.25E-01       | 1.79E-01   | ---              |
| <i>CPT1C</i>    | 513      | -1.52         | 1.28E-01       | 1.84E-01   | ---              |
| <i>TAPBP</i>    | 513      | 1.52          | 1.29E-01       | 1.84E-01   | +--              |
| <i>SLCO4C1</i>  | 513      | -1.52         | 1.29E-01       | 1.84E-01   | ---              |
| <i>TSNARE1</i>  | 513      | -1.52         | 1.29E-01       | 1.84E-01   | ---              |
| <i>HIST1H4E</i> | 513      | 1.51          | 1.31E-01       | 1.85E-01   | --+              |
| <i>GNL3</i>     | 513      | 1.49          | 1.36E-01       | 1.92E-01   | +--              |
| <i>NEK4</i>     | 513      | -1.48         | 1.39E-01       | 1.95E-01   | ---              |
| <i>HAPLN4</i>   | 513      | -1.47         | 1.41E-01       | 1.97E-01   | ---              |
| <i>ZFYVE21</i>  | 513      | -1.47         | 1.42E-01       | 1.98E-01   | ---              |
| <i>NMUR2</i>    | 513      | -1.47         | 1.43E-01       | 1.99E-01   | ---              |
| <i>ACTR5</i>    | 513      | -1.46         | 1.44E-01       | 1.99E-01   | ---              |
| <i>GPANK1</i>   | 513      | -1.46         | 1.45E-01       | 2.00E-01   | ---              |
| <i>LST1</i>     | 513      | -1.45         | 1.47E-01       | 2.01E-01   | ---              |
| <i>CENPM</i>    | 513      | -1.45         | 1.46E-01       | 2.01E-01   | ---              |
| <i>HIST1H3I</i> | 513      | -1.45         | 1.47E-01       | 2.01E-01   | ---              |
| <i>MAFK</i>     | 513      | -1.45         | 1.48E-01       | 2.02E-01   | ---              |
| <i>HIST1H1T</i> | 513      | -1.45         | 1.48E-01       | 2.02E-01   | ---              |
| <i>HIST1H1B</i> | 513      | -1.44         | 1.49E-01       | 2.02E-01   | ---              |
| <i>KLF1</i>     | 513      | -1.44         | 1.50E-01       | 2.02E-01   | ---              |
| <i>CLCN3</i>    | 513      | 1.44          | 1.50E-01       | 2.03E-01   | --+              |
| <i>DAXX</i>     | 513      | 1.44          | 1.51E-01       | 2.03E-01   | +--              |
| <i>CD70</i>     | 513      | -1.43         | 1.51E-01       | 2.03E-01   | ---              |
| <i>DESI1</i>    | 513      | -1.42         | 1.55E-01       | 2.06E-01   | ---              |
| <i>IER3</i>     | 513      | -1.42         | 1.56E-01       | 2.07E-01   | ---              |
| <i>GALNT10</i>  | 513      | -1.42         | 1.55E-01       | 2.07E-01   | ---              |
| <i>NCR3</i>     | 513      | 1.42          | 1.56E-01       | 2.07E-01   | +--              |
| <i>HLA-DOB</i>  | 513      | -1.42         | 1.57E-01       | 2.07E-01   | ---              |
| <i>FTCDNL1</i>  | 311      | -1.40         | 1.61E-01       | 2.12E-01   | ?--              |
| <i>ATG13</i>    | 513      | -1.40         | 1.62E-01       | 2.13E-01   | ---              |
| <i>CPEB1</i>    | 513      | -1.40         | 1.63E-01       | 2.13E-01   | ---              |
| <i>DPEP3</i>    | 513      | -1.39         | 1.65E-01       | 2.15E-01   | ---              |
| <i>MNT</i>      | 513      | 1.37          | 1.71E-01       | 2.22E-01   | +--              |
| <i>SFMBT1</i>   | 513      | -1.36         | 1.73E-01       | 2.24E-01   | ---              |
| <i>LSM1</i>     | 513      | 1.35          | 1.77E-01       | 2.29E-01   | +--              |
| <i>IFNL2</i>    | 513      | -1.32         | 1.85E-01       | 2.38E-01   | ---              |
| <i>HHAT</i>     | 513      | -1.33         | 1.85E-01       | 2.38E-01   | ---              |
| <i>MDK</i>      | 513      | 1.31          | 1.89E-01       | 2.42E-01   | +--              |
| <i>SNX19</i>    | 513      | -1.31         | 1.91E-01       | 2.43E-01   | ---              |
| <i>TMEM243</i>  | 513      | 1.31          | 1.91E-01       | 2.43E-01   | +--              |
| <i>FKBPL</i>    | 513      | -1.30         | 1.93E-01       | 2.45E-01   | ---              |



| <b>Gene</b>      | <b>N</b> | <b>Zscore</b> | <b>P-value</b> | <b>FDR</b> | <b>Direction</b> |
|------------------|----------|---------------|----------------|------------|------------------|
| <i>ETS1</i>      | 513      | -1.30         | 1.95E-01       | 2.47E-01   | ---              |
| <i>HIST1H1E</i>  | 513      | -1.28         | 2.00E-01       | 2.53E-01   | ---              |
| <i>SLC44A4</i>   | 513      | 1.27          | 2.04E-01       | 2.57E-01   | +--              |
| <i>HIST1H3E</i>  | 311      | -1.25         | 2.10E-01       | 2.64E-01   | ?--              |
| <i>PGBD1</i>     | 513      | -1.24         | 2.14E-01       | 2.68E-01   | ---              |
| <i>GTF2H4</i>    | 513      | -1.24         | 2.16E-01       | 2.69E-01   | ---              |
| <i>ZKSCAN4</i>   | 513      | -1.22         | 2.23E-01       | 2.78E-01   | ---              |
| <i>AP3B2</i>     | 513      | -1.21         | 2.26E-01       | 2.80E-01   | ---              |
| <i>HLA-DMA</i>   | 513      | -1.21         | 2.26E-01       | 2.80E-01   | ---              |
| <i>ZNF165</i>    | 513      | -1.19         | 2.34E-01       | 2.89E-01   | ---              |
| <i>ITIH4</i>     | 513      | -1.18         | 2.38E-01       | 2.93E-01   | ---              |
| <i>SPECC1</i>    | 513      | -1.18         | 2.40E-01       | 2.94E-01   | ---              |
| <i>NR1H3</i>     | 513      | -1.17         | 2.43E-01       | 2.97E-01   | ---              |
| <i>USF1</i>      | 513      | -1.16         | 2.47E-01       | 3.00E-01   | ---              |
| <i>BTN3A1</i>    | 513      | 1.16          | 2.46E-01       | 3.00E-01   | +--              |
| <i>MAD1L1</i>    | 513      | -1.15         | 2.50E-01       | 3.03E-01   | ---              |
| <i>ABT1</i>      | 513      | -1.15         | 2.52E-01       | 3.03E-01   | ---              |
| <i>FAM109B</i>   | 513      | -1.15         | 2.52E-01       | 3.03E-01   | ---              |
| <i>PPP1R16B</i>  | 513      | 1.14          | 2.54E-01       | 3.05E-01   | +--              |
| <i>ERCC8</i>     | 513      | 1.12          | 2.63E-01       | 3.16E-01   | +--              |
| <i>KCTD13</i>    | 513      | 1.11          | 2.65E-01       | 3.17E-01   | +--              |
| <i>PCCB</i>      | 513      | 1.09          | 2.77E-01       | 3.30E-01   | --+              |
| <i>PRSS3</i>     | 513      | 1.08          | 2.82E-01       | 3.36E-01   | --+              |
| <i>MICA</i>      | 305      | -1.07         | 2.83E-01       | 3.36E-01   | --?              |
| <i>PPP4C</i>     | 311      | -1.07         | 2.86E-01       | 3.38E-01   | ?--              |
| <i>HIST1H3B</i>  | 513      | -1.05         | 2.93E-01       | 3.45E-01   | ---              |
| <i>SLC45A1</i>   | 513      | -1.03         | 3.01E-01       | 3.54E-01   | ---              |
| <i>OR12D2</i>    | 513      | -1.01         | 3.14E-01       | 3.68E-01   | ---              |
| <i>MLN</i>       | 513      | -0.99         | 3.21E-01       | 3.76E-01   | ---              |
| <i>ZSCAN12</i>   | 311      | -0.96         | 3.37E-01       | 3.93E-01   | ?--              |
| <i>FES</i>       | 513      | -0.95         | 3.40E-01       | 3.96E-01   | ---              |
| <i>C4B</i>       | 202      | -0.94         | 3.45E-01       | 3.99E-01   | -??              |
| <i>ZBTB22</i>    | 311      | -0.95         | 3.44E-01       | 3.99E-01   | ?--              |
| <i>HIST1H2BC</i> | 513      | -0.94         | 3.46E-01       | 4.00E-01   | ---              |
| <i>PRRG2</i>     | 513      | -0.92         | 3.58E-01       | 4.12E-01   | ---              |
| <i>SHISA8</i>    | 513      | -0.90         | 3.69E-01       | 4.23E-01   | ---              |
| <i>CACNB2</i>    | 513      | 0.90          | 3.71E-01       | 4.25E-01   | --+              |
| <i>LEMD2</i>     | 513      | -0.89         | 3.75E-01       | 4.28E-01   | ---              |
| <i>HLA-A</i>     | 513      | 0.88          | 3.81E-01       | 4.34E-01   | +--              |
| <i>NGEF</i>      | 513      | -0.87         | 3.84E-01       | 4.37E-01   | ---              |
| <i>ZKSCAN3</i>   | 513      | -0.87         | 3.86E-01       | 4.37E-01   | ---              |
| <i>ARPC3</i>     | 513      | 0.85          | 3.93E-01       | 4.44E-01   | --+              |
| <i>UBD</i>       | 202      | -0.83         | 4.05E-01       | 4.57E-01   | -??              |

| <b>Gene</b>     | <b>N</b> | <b>Zscore</b> | <b>P-value</b> | <b>FDR</b> | <b>Direction</b> |
|-----------------|----------|---------------|----------------|------------|------------------|
| <i>MYO15A</i>   | 513      | -0.83         | 4.07E-01       | 4.58E-01   | ---              |
| <i>CYP21A2</i>  | 410      | -0.81         | 4.16E-01       | 4.66E-01   | -?-              |
| <i>TRIM38</i>   | 513      | 0.80          | 4.21E-01       | 4.71E-01   | +--              |
| <i>HLA-DQA1</i> | 311      | -0.79         | 4.30E-01       | 4.80E-01   | ?--              |
| <i>KLF4</i>     | 513      | -0.78         | 4.34E-01       | 4.83E-01   | ---              |
| <i>RAB27B</i>   | 513      | 0.76          | 4.46E-01       | 4.95E-01   | +--              |
| <i>INA</i>      | 513      | -0.76         | 4.47E-01       | 4.95E-01   | ---              |
| <i>XPNPEP3</i>  | 513      | 0.75          | 4.55E-01       | 5.02E-01   | +--              |
| <i>C6orf15</i>  | 513      | -0.75         | 4.55E-01       | 5.02E-01   | ---              |
| <i>SLC4A1AP</i> | 513      | 0.74          | 4.59E-01       | 5.05E-01   | --+              |
| <i>PRSS16</i>   | 513      | -0.73         | 4.65E-01       | 5.09E-01   | ---              |
| <i>SLC17A2</i>  | 513      | -0.72         | 4.73E-01       | 5.18E-01   | ---              |
| <i>CSDC2</i>    | 513      | -0.71         | 4.77E-01       | 5.20E-01   | ---              |
| <i>NFATC3</i>   | 513      | 0.69          | 4.90E-01       | 5.33E-01   | +--              |
| <i>NDUFA13</i>  | 305      | -0.68         | 4.95E-01       | 5.38E-01   | --?              |
| <i>BTNL2</i>    | 311      | -0.68         | 4.98E-01       | 5.39E-01   | ?--              |
| <i>SERPIND1</i> | 513      | -0.67         | 5.05E-01       | 5.44E-01   | ---              |
| <i>ITIH3</i>    | 513      | -0.67         | 5.05E-01       | 5.44E-01   | ---              |
| <i>DFNA5</i>    | 513      | -0.66         | 5.11E-01       | 5.49E-01   | ---              |
| <i>AKT3</i>     | 513      | 0.65          | 5.16E-01       | 5.51E-01   | --+              |
| <i>MMP9</i>     | 513      | -0.65         | 5.16E-01       | 5.51E-01   | ---              |
| <i>SFTA2</i>    | 513      | -0.64         | 5.20E-01       | 5.55E-01   | ---              |
| <i>WBP2NL</i>   | 513      | -0.62         | 5.33E-01       | 5.67E-01   | ---              |
| <i>MYOG</i>     | 513      | -0.60         | 5.48E-01       | 5.81E-01   | ---              |
| <i>VSTM2L</i>   | 513      | -0.59         | 5.53E-01       | 5.85E-01   | ---              |
| <i>KLC1</i>     | 513      | 0.53          | 5.93E-01       | 6.26E-01   | --+              |
| <i>HIST1H4K</i> | 202      | -0.53         | 5.97E-01       | 6.29E-01   | -??              |
| <i>NMB</i>      | 513      | -0.52         | 6.00E-01       | 6.31E-01   | ---              |
| <i>JUND</i>     | 513      | 0.51          | 6.14E-01       | 6.43E-01   | +--              |
| <i>PPM1M</i>    | 513      | -0.50         | 6.15E-01       | 6.43E-01   | ---              |
| <i>ZFP57</i>    | 513      | -0.49         | 6.28E-01       | 6.55E-01   | ---              |
| <i>REEP2</i>    | 513      | -0.44         | 6.58E-01       | 6.84E-01   | ---              |
| <i>POM121L2</i> | 311      | -0.44         | 6.61E-01       | 6.86E-01   | ?--              |
| <i>C6orf48</i>  | 513      | 0.43          | 6.67E-01       | 6.91E-01   | +--              |
| <i>C4A</i>      | 202      | -0.39         | 6.97E-01       | 7.20E-01   | -??              |
| <i>EGFL8</i>    | 202      | -0.34         | 7.35E-01       | 7.58E-01   | -??              |
| <i>HIST1H3C</i> | 513      | -0.33         | 7.41E-01       | 7.61E-01   | ---              |
| <i>RERE</i>     | 513      | 0.33          | 7.41E-01       | 7.61E-01   | +--              |
| <i>APOPT1</i>   | 513      | -0.21         | 8.34E-01       | 8.54E-01   | --+              |
| <i>ALMS1</i>    | 513      | 0.20          | 8.39E-01       | 8.57E-01   | --+              |
| <i>EGR1</i>     | 513      | -0.20         | 8.41E-01       | 8.57E-01   | --+              |
| <i>DDR1</i>     | 410      | 0.17          | 8.63E-01       | 8.77E-01   | +?-              |
| <i>C2orf47</i>  | 513      | 0.14          | 8.85E-01       | 8.98E-01   | +--              |

| <b>Gene</b>    | <b>N</b> | <b>Zscore</b> | <b>P-value</b> | <b>FDR</b> | <b>Direction</b> |
|----------------|----------|---------------|----------------|------------|------------------|
| <i>FOXP1</i>   | 513      | -0.13         | 8.94E-01       | 9.04E-01   | +--              |
| <i>LY6G5B</i>  | 202      | -0.11         | 9.11E-01       | 9.19E-01   | -??              |
| <i>CDK2AP1</i> | 311      | -0.10         | 9.22E-01       | 9.28E-01   | ?--              |
| <i>CUL3</i>    | 513      | 0.08          | 9.40E-01       | 9.42E-01   | --+              |
| <i>PSMG3</i>   | 513      | 0.08          | 9.39E-01       | 9.42E-01   | --+              |
| <i>BAG6</i>    | 513      | -0.04         | 9.72E-01       | 9.72E-01   | +--              |

NOTE: N means the number of subjects in meta analyses.
